# Supplementary material
Source: publisher figshare collection journal article supplement (https://gsapubs.figshare.com/ndownloader/files/23305853)
Supplement: Supplementary file 1 [file 23305853]

## Sheet: Table DR1
Link, P.K., Todt, M.K., Pearson, D.M., and Thomas, R.C., 2017, 500–490 Ma detrital zircons in Upper Cambrian Worm Creek and correlative sandstones, Idaho, Montana, and Wyoming: Magmatism and tectonism within the passive margin: Lithosphere, doi:10.1130/L671.1
GSA Data Repository Item 2017339
Table DR1. Locations and description of samples
Sample Name	Site	Type	Cycle	Instrument	Analysis	Zone	Easting	Northing	Elev. (ft)	Elev. (m)	Projection
Worm Creek Sandstone, Nounan Dolomite, and stratigraphic column locations
01MKT12	Midnight Creek, ID	Worm Creek quartzite - lower	2	LA-MC-ICP-MS	U-Pb, Lu-Hf	12	376234	4731387	6285	1916	WGS84
02MKT12	Midnight Creek, ID	Worm Creek quartzite - middle	3	LA-MC-ICP-MS	U-Pb, Lu-Hf	12	376385	4731422	6344	1934	WGS84
03MKT12	Midnight Creek, ID	Worm Creek quartzite - upper	4	LA-MC-ICP-MS	U-Pb, Lu-Hf	12	376531	4731491	6307	1922	WGS84
07MKT12	McPherson Canyon Rd, ID	Worm Creek quartzite - lower	2	LA-MC-ICP-MS	U-Pb, Lu-Hf	12	443855	4712685	5852	1784	WGS84
08MKT12	McPherson Canyon Rd, ID	Worm Creek quartzite - middle	3	LA-MC-ICP-MS	U-Pb, Lu-Hf	12	443900	4712733	5915	1803	WGS84
09MKT12	McPherson Canyon Rd, ID	Worm Creek quartzite - upper	4	LA-MC-ICP-MS	U-Pb, Lu-Hf	12	444025	4712786	6005	1830	WGS84
01MKT13	Weston Canyon, ID	Nounan Dolomite	1	LA-MC-ICP-MS	U-Pb	12	408301	4663365	5512	1938	WGS84
07MKT13	Secret Canyon, ID	Nounan Dolomite	1	LA-MC-ICP-MS	U-Pb	12	393521	4681064	6359	1680	WGS84
Eastern Idaho, Western Wyoming, and Western Montana sedimentary samples
11PL03	Melrose, MT	White sand in upper Pilgrim Fm.		LA-MC-ICP-MS	U-Pb	12	373250	5056777	5531	1686	WGS84
12PL03	Wind River Canyon, WY	Du Noir Member Gallatin Ls.		LA-MC-ICP-MS	U-Pb	12	729039	4813897	5081	1549	WGS84
151PL02	Leaton Gulch, ID	Wilbert Fm., Leaton Gulch, Skolithos		LA-MC-ICP-MS	U-Pb	11	731909	4935574	7918	2413	WGS84
1PL13	Teton Pass, WY	Flathead Sandstone		LA-MC-ICP-MS	U-Pb	12	503752	4816270	8419	2566	WGS84
Central Idaho Plutons		Age (Ma); MSWD; n
05MKT12	Eighteen Mile creek, ID - Beaverhead pluton	496.2 ± 2.3; 0.6; 35		LA-MC-ICP-MS	U-Pb, Lu-Hf	12	337841	4924094	9595	2925	WGS84
06MKT12	Eighteen Mile creek, ID - Beaverhead pluton	500.8 ± 2.8; 0.4; 30		LA-MC-ICP-MS	U-Pb, Lu-Hf	12	338021	4923613	9983	3043	WGS84
01LKB12	Deep Creek, ID - Deep Creek pluton	492.1 ± 4.2; 0.2; 43		LA-MC-ICP-MS	U-Pb, Lu-Hf	11	719077	5000741	4917	1499	WGS84
02LKB12	Deep Creek, ID - Deep Creek pluton	491.5 ± 2.4; 0.4; 41		LA-MC-ICP-MS	U-Pb, Lu-Hf	11	718789	5002076	4975	1516	WGS84

## Sheet: Table DR2
Link, P.K., Todt, M.K., Pearson, D.M., and Thomas, R.C., 2017, 500–490 Ma detrital zircons in Upper Cambrian Worm Creek and correlative sandstones, Idaho, Montana, and Wyoming: Magmatism and tectonism within the passive margin: Lithosphere, doi:10.1130/L671.1
GSA Data Repository Item 2017339
Table DR2. U-Pb zircon data
							Isotope ratios						Apparent ages (Ma)
Analysis	U	206Pb	U/Th	206Pb*	±	207Pb*	±	206Pb*	±	error	206Pb*	±	207Pb*	±	206Pb*	±	Best age	±	Conc
	(ppm)	204Pb		207Pb*	(%)	235U*	(%)	238U	(%)	corr.	238U*	(Ma)	235U	(Ma)	207Pb*	(Ma)	(Ma)	(Ma)	(%)
01MKT12-001	76.2543	74238.6	1.55005	17.5074	9.27989	0.638829	9.49158	0.0811159	1.99344	0.210022	502.78	9.64176	501.581	37.5853	496.131	204.891	502.78	9.64176	101.34
01MKT12-002	19.6364	17614.9	0.758924	19.8087	16.3516	0.554751	17.2341	0.0796991	5.44437	0.315906	494.326	25.9071	448.104	62.518	217.294	380.717	494.326	25.9071	227.492
01MKT12-003	44.7783	11225.9	1.24673	19.2185	8.27851	0.5721	9.00929	0.0797424	3.55437	0.394523	494.585	16.922	459.372	33.3018	286.894	189.517	494.585	16.922	172.393
01MKT12-004	259.516	150335	0.67765	17.5056	1.64357	0.641283	1.71305	0.0814187	0.482915	0.281904	504.585	2.34379	503.1	6.79628	496.348	36.2239	504.585	2.34379	101.66
01MKT12-005	213.428	243818	2.92538	8.50133	0.574197	5.18994	1.56515	0.319999	1.45602	0.930275	1789.72	22.7543	1850.97	13.3256	1920.49	10.2947	1920.49	10.2947	93.1908
01MKT12-006	464.862	206241	4.49318	16.9925	0.567953	0.743599	0.850349	0.0916419	0.632869	0.744246	565.24	3.42488	564.504	3.68232	561.536	12.3624	565.24	3.42488	100.66
01MKT12-006	69.1245	19909.5	0.414948	16.5164	3.58737	0.668045	3.83703	0.0800238	1.36147	0.354823	496.265	6.50296	519.523	15.6048	623.123	77.4124	496.265	6.50296	79.6415
01MKT12-007	146.117	136353	2.07181	9.55081	0.41576	4.44212	1.09622	0.307701	1.01432	0.925288	1729.38	15.3856	1720.23	9.08579	1709.09	7.64913	1709.09	7.64913	101.187
01MKT12-008	28.5938	10069.6	1.4537	19.3767	8.27625	0.570349	9.15484	0.0801531	3.91342	0.42747	497.036	18.7202	458.24	33.7742	268.07	190.14	497.036	18.7202	185.413
01MKT12-009	205.644	340871	1.5878	9.32034	0.520856	4.74441	1.75022	0.320711	1.67092	0.954692	1793.2	26.1567	1775.12	14.6788	1753.91	9.53124	1753.91	9.53124	102.24
01MKT12-011	30.8874	14393.7	0.496061	18.4994	16.1781	0.600437	16.5151	0.080561	3.31934	0.200989	499.47	15.9532	477.511	62.9935	373.349	366.299	499.47	15.9532	133.781
01MKT12-012	48.4837	21976.7	0.879535	17.5604	11.5151	0.631219	11.6362	0.0803919	1.67464	0.143916	498.461	8.03286	496.855	45.7514	489.445	254.777	498.461	8.03286	101.842
01MKT12-013	26.1127	9973.32	1.22618	18.1904	18.803	0.599242	19.4177	0.0790577	4.84701	0.249618	490.496	22.8925	476.753	74.0089	411.143	423.805	490.496	22.8925	119.301
01MKT12-014	28.4643	18752.4	0.428322	17.0217	10.7303	0.65358	11.1685	0.0806865	3.09784	0.277373	500.219	14.91	510.68	44.8519	557.803	234.564	500.219	14.91	89.6766
01MKT12-015	185.53	29848.6	1.30121	17.2517	2.65429	0.640907	3.03804	0.0801911	1.47798	0.486492	497.263	7.07315	502.868	12.0491	528.469	58.1726	497.263	7.07315	94.0951
01MKT12-016	80.8691	35614.3	1.15364	17.2657	5.93869	0.641967	6.03357	0.0803887	1.06581	0.176647	498.443	5.11227	503.523	23.957	526.696	130.294	498.443	5.11227	94.6358
01MKT12-017	101.649	51134.2	1.70968	16.8112	2.4294	0.661237	2.83881	0.0806223	1.46862	0.517336	499.836	7.06331	515.37	11.4739	584.877	52.7396	499.836	7.06331	85.4602
01MKT12-018	79.2399	15583.5	0.926237	17.6356	5.16619	0.626921	5.54416	0.0801867	2.01201	0.362905	497.237	9.62833	494.176	21.6959	479.994	114.225	497.237	9.62833	103.592
01MKT12-019	54.4779	25682.3	0.48159	17.0095	8.27812	0.662613	8.54968	0.0817431	2.13771	0.250033	506.518	10.4134	516.211	34.6112	559.351	180.738	506.518	10.4134	90.5547
01MKT12-020	47.7675	20971.5	0.51351	16.9333	8.1306	0.648524	8.66192	0.0796464	2.98698	0.344841	494.012	14.2048	507.57	34.6133	569.153	177.215	494.012	14.2048	86.7977
01MKT12-021	137.251	101385	1.45331	17.591	4.63799	0.636148	4.88968	0.0811609	1.54853	0.316694	503.048	7.49368	499.919	19.3063	485.622	102.456	503.048	7.49368	103.588
01MKT12-022	30.631	9871.37	1.08826	19.5407	13.7586	0.566915	14.0512	0.0803444	2.85248	0.203006	498.178	13.6752	456.017	51.6643	248.734	317.984	498.178	13.6752	200.286
01MKT12-023	60.7839	8653.97	1.28479	16.5365	7.72928	0.675458	7.9481	0.0810103	1.8522	0.233037	502.15	8.94782	524.026	32.5467	620.499	166.978	502.15	8.94782	80.9268
01MKT12-024	136.089	71877.5	1.26014	17.477	2.9651	0.641842	5.37281	0.081357	4.48054	0.833929	504.217	21.7308	503.446	21.33	499.964	65.3288	504.217	21.7308	100.851
01MKT12-025	25.5012	18467	0.552167	17.594	12.7301	0.628899	13.4045	0.0802498	4.19828	0.313198	497.614	20.1053	495.409	52.5965	485.237	282.042	497.614	20.1053	102.551
01MKT12-026	161.091	315447	1.12137	11.0209	0.524747	3.1877	1.11334	0.254796	0.981921	0.881959	1463.16	12.8533	1454.18	8.60539	1441.06	10.0007	1441.06	10.0007	101.534
01MKT12-027	70.0375	20412.9	0.81202	18.6117	4.18131	0.587224	5.22587	0.0792663	3.13469	0.599842	491.742	14.8414	469.093	19.634	359.713	94.3889	491.742	14.8414	136.704
01MKT12-028	213.241	91544.9	0.47347	17.5346	2.6263	0.622554	2.76275	0.0791719	0.857508	0.310383	491.178	4.05543	491.447	10.7638	492.703	57.9185	491.178	4.05543	99.6904
01MKT12-029	35.7345	32760.9	0.674011	18.1037	7.26747	0.607381	7.65228	0.0797496	2.39609	0.313121	494.628	11.4085	481.907	29.3687	421.814	162.385	494.628	11.4085	117.262
01MKT12-030	175.37	160975	1.73724	17.3594	2.66983	0.638634	2.78136	0.0804054	0.779733	0.280342	498.542	3.74079	501.46	11.0072	514.778	58.65	498.542	3.74079	96.846
01MKT12-032	179.467	117414	0.664453	17.1362	1.4303	0.645032	1.93737	0.080167	1.30676	0.674505	497.119	6.25201	505.417	7.7136	543.171	31.2649	497.119	6.25201	91.5217
01MKT12-033	73.6364	127534	2.08508	9.50404	0.943585	4.43716	1.20675	0.305852	0.752255	0.623374	1720.26	11.358	1719.3	9.99984	1718.12	17.3428	1718.12	17.3428	100.125
01MKT12-034	50.0162	22423.5	1.20768	18.0565	12.2813	0.615	12.3601	0.0805392	1.39289	0.112692	499.34	6.69268	486.709	47.8271	427.648	274.772	499.34	6.69268	116.764
01MKT12-035	114.648	26293.3	0.853667	17.2863	4.80369	0.630732	5.00155	0.0790763	1.39285	0.278485	490.607	6.57989	496.552	19.6449	524.034	105.423	490.607	6.57989	93.6212
01MKT12-036	214.133	60470.6	1.48249	17.2617	2.07992	0.635707	2.44922	0.0795863	1.2933	0.528046	493.653	6.14609	499.645	9.66546	527.207	45.5731	493.653	6.14609	93.6354
01MKT12-037	29.9802	21909.3	0.546329	16.7355	11.3205	0.652254	11.6375	0.0791691	2.69782	0.231821	491.161	12.7584	509.865	46.6805	594.63	246.053	491.161	12.7584	82.5995
01MKT12-038	105.465	32723.3	1.23414	17.2312	2.55238	0.641743	2.86417	0.0802002	1.29954	0.453724	497.318	6.21984	503.385	11.3685	531.077	55.9381	497.318	6.21984	93.6431
01MKT12-039	244.346	35128.5	1.96954	6.05525	0.369382	10.5228	1.08102	0.462129	1.01595	0.93981	2448.95	20.7001	2481.93	10.0242	2509.03	6.21016	2509.03	6.21016	97.6056
01MKT12-040	85.8393	65264.7	0.927235	10.119	1.03483	3.28369	2.27131	0.24099	2.02188	0.890181	1391.84	25.3109	1477.19	17.6805	1602.03	19.3043	1602.03	19.3043	86.8802
01MKT12-041	153.938	79701.6	0.970233	9.47316	0.287378	4.43703	1.94995	0.30485	1.92865	0.98908	1715.31	29.047	1719.28	16.1592	1724.1	5.27837	1724.1	5.27837	99.4904
01MKT12-042	79.3282	36577.4	0.861989	17.1129	4.71513	0.642156	5.75335	0.0797006	3.29675	0.573014	494.335	15.6879	503.64	22.8481	546.112	103.07	494.335	15.6879	90.519
01MKT12-043	230.454	741092	1.74481	9.32872	0.267137	4.6624	1.09415	0.31545	1.06104	0.969737	1767.47	16.4023	1760.52	9.14802	1752.26	4.88937	1752.26	4.88937	100.868
01MKT12-044	21.8387	6190.72	1.166	19.4494	18.4004	0.560525	18.6939	0.0790678	3.30001	0.176528	490.556	15.5878	451.868	68.2825	259.482	425.842	490.556	15.5878	189.052
01MKT12-045	39.0284	19584.7	0.787708	19.1914	14.2327	0.575162	14.5328	0.0800564	2.93809	0.20217	496.459	14.0389	461.347	53.9326	290.098	326.617	496.459	14.0389	171.135
01MKT12-046	27.2682	6886.69	0.455144	18.6827	12.9564	0.577809	14.8683	0.0782927	7.29372	0.490554	485.924	34.1394	463.052	55.3416	351.147	293.893	485.924	34.1394	138.382
01MKT12-047	177.39	58587.1	0.675748	17.6532	2.79612	0.62659	3.03907	0.0802243	1.19065	0.391782	497.462	5.70026	493.969	11.8876	477.793	61.8402	497.462	5.70026	104.117
01MKT12-048	58.6954	24278.3	0.945654	17.1591	7.17412	0.644365	7.64534	0.0801907	2.64257	0.345645	497.261	12.6465	505.005	30.4292	540.26	157.082	497.261	12.6465	92.0411
01MKT12-049	164.261	484904	2.17049	6.37936	0.343688	9.69078	0.953381	0.448368	0.889277	0.932761	2387.99	17.7465	2405.83	8.77519	2420.95	5.82958	2420.95	5.82958	98.6387
01MKT12-050	199.948	76054.4	0.568074	17.5921	1.73591	0.63	2.20536	0.0803818	1.36023	0.616784	498.401	6.52395	496.096	8.65511	485.451	38.3245	498.401	6.52395	102.668
01MKT12-60	47.2183	6125.09	1.077	16.3936	12.4354	0.666014	12.6559	0.0791875	2.3521	0.185851	491.271	11.1259	518.286	51.416	639.235	268.447	491.271	11.1259	76.853
01MKT12-052	189.924	195552	0.665566	17.46	1.44585	0.637407	1.67918	0.0807162	0.853918	0.508533	500.396	4.11134	500.7	6.63733	502.088	31.818	500.396	4.11134	99.663
01MKT12-053	127.018	73870.5	1.71594	17.3932	2.33764	0.634121	2.83792	0.0799929	1.60911	0.567002	496.08	7.68305	498.66	11.1824	510.511	51.3908	496.08	7.68305	97.1732
01MKT12-054	203.626	79023.1	0.912393	17.434	1.80856	0.633954	4.44554	0.0801594	4.06103	0.913506	497.074	19.4277	498.556	17.5152	505.362	39.7898	497.074	19.4277	98.3601
01MKT12-055	40.4377	12320.1	1.43157	18.4702	12.905	0.595026	13.1589	0.0797087	2.57229	0.195479	494.384	12.2416	474.072	49.8846	376.91	291.396	494.384	12.2416	131.168
01MKT12-056	24.7197	7409.91	0.971722	17.0574	12.8153	0.646637	13.86	0.0799965	5.27904	0.380882	496.102	25.2072	506.407	55.3205	553.22	280.681	496.102	25.2072	89.6753
01MKT12-057	103.275	53876.7	0.637318	17.7646	2.26432	0.626176	2.81811	0.0806771	1.67769	0.595322	500.163	8.0739	493.711	11.0188	463.911	50.1797	500.163	8.0739	107.814
01MKT12-058	57.8663	12787.7	1.42174	17.658	4.29269	0.62571	4.64302	0.0801335	1.76931	0.381069	496.919	8.46173	493.42	18.1471	477.189	94.9589	496.919	8.46173	104.135
01MKT12-059	201.384	68925.1	1.75661	17.4744	2.31713	0.639073	2.64948	0.0809938	1.28476	0.484912	502.052	6.2054	501.732	10.4896	500.296	51.0297	502.052	6.2054	100.351
01MKT12-060	155.892	65326.9	0.925737	17.4714	1.66192	0.627567	2.06007	0.0795219	1.21733	0.59092	493.268	5.78074	494.579	8.06569	500.675	36.6011	493.268	5.78074	98.5206
01MKT12-061	98.6157	45859.5	0.608059	17.6688	4.40136	0.629442	4.56397	0.0806608	1.20744	0.264558	500.066	5.80972	495.748	17.9034	475.852	97.3673	500.066	5.80972	105.088
01MKT12-062	49.6399	26008	0.607508	18.4304	2.85562	0.597299	4.07948	0.0798408	2.91334	0.714145	495.173	13.8859	475.518	15.4908	381.762	64.2	495.173	13.8859	129.707
01MKT12-063	197.832	446667	0.981974	9.51175	0.40678	4.42438	0.602982	0.305219	0.445103	0.73817	1717.14	6.70977	1716.92	4.9939	1716.63	7.47852	1716.63	7.47852	100.03
01MKT12-064	105.466	36448.2	1.26894	18.0497	3.66299	0.611465	3.9939	0.0800461	1.5918	0.398556	496.398	7.60507	484.484	15.389	428.488	81.6823	496.398	7.60507	115.849
01MKT12-065	140.652	39544.2	1.20016	17.3009	2.37549	0.65097	2.6642	0.0816822	1.20623	0.452756	506.156	5.87188	509.076	10.6668	522.191	52.1187	506.156	5.87188	96.9292
01MKT12-066	45.51	55915.4	0.761093	17.7809	8.64857	0.624394	9.27035	0.0805216	3.3379	0.360062	499.235	16.0351	492.598	36.1974	461.834	192.045	499.235	16.0351	108.099
01MKT12-067	46.4363	21378.9	0.511123	17.9649	6.90553	0.620278	7.42393	0.0808183	2.7255	0.367124	501.005	13.1378	490.022	28.8654	438.976	153.838	501.005	13.1378	114.13
01MKT12-068	66.5755	29528.2	0.749312	17.4061	3.36973	0.640786	3.65806	0.0808933	1.42348	0.389135	501.453	6.86752	502.793	14.5068	508.897	74.1113	501.453	6.86752	98.5372
01MKT12-070	154.134	36491.5	0.688011	17.3522	2.44796	0.627295	3.0364	0.0789453	1.79645	0.591636	489.824	8.47343	494.41	11.8854	515.682	53.7905	489.824	8.47343	94.9857
01MKT12-071	130.961	51869.8	1.37267	17.8988	2.7589	0.608884	2.95638	0.079042	1.06237	0.359348	490.402	5.01663	482.856	11.361	447.167	61.3238	490.402	5.01663	109.669
01MKT12-072	19.8815	13134.8	1.19332	17.7076	14.5255	0.617119	14.8184	0.079255	2.93195	0.197858	491.674	13.8796	488.04	57.4808	471.034	322.989	491.674	13.8796	104.382
01MKT12-073	140.034	43779.4	1.5611	17.2577	1.94025	0.641608	2.14591	0.0803068	0.916715	0.427192	497.954	4.39296	503.301	8.51632	527.706	42.5351	497.954	4.39296	94.362
01MKT12-074	144.719	68168.5	0.93302	17.3922	1.91535	0.628903	2.14281	0.07933	0.960761	0.448365	492.123	4.55215	495.412	8.40064	510.664	42.112	492.123	4.55215	96.3691
01MKT12-075	56.9335	43376.3	0.962994	17.8747	7.31143	0.602146	7.56893	0.078062	1.95745	0.258617	484.544	9.13703	478.595	28.8922	450.163	162.587	484.544	9.13703	107.638
01MKT12-076	110.854	160040	1.64588	9.51907	0.515419	4.41446	1.8216	0.304769	1.74716	0.959135	1714.91	26.3081	1715.06	15.0812	1715.21	9.47752	1715.21	9.47752	99.9825
01MKT12-077	64.3711	30385.3	0.830936	17.7377	4.89956	0.625441	5.39987	0.0804606	2.26998	0.420377	498.872	10.8972	493.252	21.1004	467.226	108.566	498.872	10.8972	106.773
01MKT12-078	53.4408	23855.3	1.44241	17.9818	6.40508	0.622055	7.92989	0.081126	4.67527	0.589576	502.84	22.6157	491.135	30.8883	436.886	142.709	502.84	22.6157	115.096
01MKT12-079	94.1345	203398	1.8592	5.90286	0.308288	11.3731	0.532915	0.4869	0.434692	0.815687	2557.25	9.17611	2554.22	4.97384	2551.81	5.16059	2551.81	5.16059	100.213
01MKT12-080	150.527	126336	1.69525	17.4432	3.79793	0.623871	3.88235	0.0789259	0.805236	0.207409	489.708	3.79725	492.27	15.1461	504.231	83.6192	489.708	3.79725	97.1198
01MKT12-081	21.8989	14911.9	0.803594	20.9722	21.1798	0.520145	22.9088	0.0791166	8.73088	0.381115	490.847	41.2649	425.248	79.7559	83.5031	507.418	490.847	41.2649	587.819
01MKT12-082	61.1584	14453.9	1.21681	18.1428	7.89963	0.593714	8.02374	0.0781233	1.40579	0.175204	484.911	6.56677	473.237	30.3601	417.003	176.709	484.911	6.56677	116.285
01MKT12-083	273.109	540486	1.42179	9.29204	0.157783	4.71042	1.22343	0.317446	1.21322	0.991649	1777.24	18.8449	1769.09	10.2475	1759.47	2.88528	1759.47	2.88528	101.01
01MKT12-084	75.1982	42301.6	1.41396	17.6442	6.4629	0.619255	6.61867	0.0792447	1.42751	0.215678	491.613	6.75688	489.38	25.7068	478.922	142.969	491.613	6.75688	102.65
01MKT12-085	88.5796	36215.3	0.399951	16.831	3.78897	0.647491	3.96178	0.0790394	1.15733	0.292124	490.386	5.46489	506.934	15.8112	582.323	82.2841	490.386	5.46489	84.212
01MKT12-086	187.502	80635.8	0.3708	17.5428	2.83202	0.641264	3.80054	0.0815896	2.53452	0.666884	505.604	12.325	503.089	15.0788	491.687	62.4745	505.604	12.325	102.831
01MKT12-087	261.878	32229.6	1.08188	17.3312	2.18499	0.649825	2.7106	0.0816816	1.60411	0.591792	506.152	7.80867	508.371	10.841	518.341	47.9693	506.152	7.80867	97.6485
01MKT12-088	115.269	34998.2	1.02949	17.4448	2.86741	0.634493	3.17967	0.0802769	1.37415	0.432166	497.775	6.58275	498.891	12.5337	503.991	63.1328	497.775	6.58275	98.7668
01MKT12-089	71.6806	44274.1	0.956482	17.6848	4.00607	0.628186	4.45984	0.0805727	1.95999	0.439475	499.54	9.4212	494.965	17.4734	473.835	88.6468	499.54	9.4212	105.425
01MKT12-090	174.897	55260.6	1.82528	17.4124	2.26591	0.636266	2.63589	0.0803519	1.34668	0.5109	498.223	6.45673	499.992	10.4077	508.116	49.8232	498.223	6.45673	98.0531
01MKT12-091	113.842	55251.3	0.760416	18.057	4.6522	0.620258	5.42212	0.0812302	2.78504	0.513644	503.462	13.4881	490.009	21.079	427.578	103.807	503.462	13.4881	117.747
01MKT12-092	49.2732	20072.1	1.49243	18.4344	8.89263	0.600222	9.16967	0.0802489	2.23694	0.24395	497.608	10.7125	477.374	34.9371	381.273	200.264	497.608	10.7125	130.512
01MKT12-093	160.867	51140.9	0.897915	17.1636	2.89573	0.644975	3.16345	0.0802879	1.27366	0.402615	497.841	6.10212	505.382	12.595	539.638	63.3384	497.841	6.10212	92.2546
01MKT12-094	107.57	40043.2	1.5232	6.146	1.11581	10.5119	3.6796	0.468566	3.50634	0.952914	2477.27	72.1221	2480.96	34.1294	2483.98	18.8128	2483.98	18.8128	99.73
01MKT12-095	40.6139	15731.3	0.748179	17.7828	8.66914	0.619859	8.78186	0.0799449	1.40254	0.159708	495.794	6.69301	489.759	34.1347	461.606	192.5	495.794	6.69301	107.406
01MKT12-096	308.846	116669	0.615708	17.6173	0.99199	0.635536	1.73899	0.0812042	1.4283	0.821339	503.307	6.91526	499.539	6.86141	482.334	21.9324	503.307	6.91526	104.348
01MKT12-097	102.738	39110.9	0.665321	18.0163	4.02015	0.60979	4.10171	0.0796792	0.813894	0.198428	494.208	3.87201	483.428	15.7776	432.611	89.5938	494.208	3.87201	114.238
01MKT12-098	358.015	127436	0.48964	17.4781	1.02706	0.641663	1.37361	0.0813394	0.912107	0.664023	504.113	4.42286	503.335	5.45154	499.823	22.6183	504.113	4.42286	100.858
01MKT12-099	27.2854	12865.2	1.16664	19.5404	19.154	0.568591	19.6069	0.080581	4.18989	0.213695	499.59	20.1418	457.103	72.2871	248.75	444.421	499.59	20.1418	200.84
01MKT12-100	111.22	32181.7	1.26854	17.4702	2.2603	0.628574	2.71554	0.079644	1.50506	0.55424	493.997	7.15724	495.207	10.6427	500.825	49.7906	493.997	7.15724	98.6368
Table 02-MKT-12. U-Pb geochronologic analyses.
							Isotope ratios						Apparent ages (Ma)
Analysis	U	206Pb	U/Th	206Pb*	±	207Pb*	±	206Pb*	±	error	206Pb*	±	207Pb*	±	206Pb*	±	Best age	±	Conc
	(ppm)	204Pb		207Pb*	(%)	235U*	(%)	238U	(%)	corr.	238U*	(Ma)	235U	(Ma)	207Pb*	(Ma)	(Ma)	(Ma)	(%)
2MKT12-84	272.083	8970.01	0.474488	17.2805	1.79789	0.617981	3.15145	0.0774517	2.58828	0.821299	480.894	11.994	488.581	12.2226	524.769	39.4079	480.894	11.994	91.6393
2MKT12-054	110.71	15335.2	0.716095	17.3644	2.59177	0.617873	3.48056	0.0778141	2.32314	0.667463	483.062	10.8121	488.513	13.4977	514.168	56.9284	483.062	10.8121	93.9503
2MKT12-035	32.7595	19597.8	0.546498	17.3076	15.6771	0.627631	15.8375	0.0787843	2.24841	0.141967	488.863	10.5852	494.619	62.0877	521.336	345.88	488.863	10.5852	93.7711
2MKT12-074	39.8148	15163	0.730184	18.6657	12.1101	0.584116	12.2083	0.0790757	1.54534	0.126581	490.603	7.30017	467.103	45.7393	353.166	274.467	490.603	7.30017	138.916
2MKT12-034	81.7633	18328.1	1.24366	17.582	4.5784	0.621598	4.68393	0.0792642	0.988642	0.211071	491.729	4.68065	490.849	18.2328	486.758	101.099	491.729	4.68065	101.021
2MKT12-063	44.783	24372.4	0.935893	17.672	18.2833	0.618663	18.444	0.0792934	2.4298	0.131739	491.904	11.5077	489.009	71.6976	475.49	407.356	491.904	11.5077	103.452
2MKT12-040	112.347	55882.1	1.52458	16.906	3.27703	0.648424	3.41373	0.079506	0.956355	0.28015	493.173	4.54059	507.509	13.6356	572.638	71.304	493.173	4.54059	86.1231
2MKT12-95	339.034	45405.7	0.750536	17.259	1.80933	0.636337	2.12201	0.0796529	1.10872	0.522483	494.051	5.27298	500.036	8.3792	527.544	39.6591	494.051	5.27298	93.651
2MKT12-052	155.327	66400.5	0.748444	17.9282	2.84015	0.612617	3.04187	0.0796571	1.08927	0.358092	494.076	5.18074	485.209	11.734	443.523	63.1662	494.076	5.18074	111.398
2MKT12-81	275.016	43763.6	0.581543	17.4477	1.63952	0.629584	1.92495	0.0796694	1.00866	0.523994	494.149	4.79804	495.837	7.55151	503.631	36.0858	494.149	4.79804	98.1173
2MKT12-001	150.816	56361.7	1.37349	17.4782	2.33573	0.629562	2.55476	0.0798056	1.03497	0.405114	494.962	4.931	495.823	10.0222	499.82	51.4505	494.962	4.931	99.0281
2MKT12-99	27.3089	10679.2	0.68202	20.003	16.496	0.55016	17.6926	0.0798147	6.39617	0.361517	495.016	30.4772	445.102	63.8419	194.669	385.714	495.016	30.4772	254.286
2MKT12-031	171.653	44112.5	1.65648	17.4125	2.6356	0.633284	2.77204	0.0799756	0.858967	0.309868	495.977	4.10051	498.14	10.914	508.111	57.9884	495.977	4.10051	97.6119
2MKT12-012	363.636	117822	1.25432	17.5636	1.72726	0.62932	1.84048	0.0801648	0.635564	0.345325	497.106	3.04068	495.672	7.21828	489.051	38.1314	497.106	3.04068	101.647
2MKT12-014	106.045	38085.7	1.1397	17.2098	2.72505	0.642364	2.97982	0.0801779	1.20557	0.404579	497.185	5.7686	503.769	11.8345	533.781	59.6709	497.185	5.7686	93.144
2MKT12-065	115.986	32621.8	0.850139	17.4215	5.97219	0.634775	6.10529	0.0802055	1.26784	0.207662	497.349	6.06848	499.066	24.0757	506.938	131.483	497.349	6.06848	98.1084
2MKT12-013	103.498	23231.7	0.50043	17.2505	4.57151	0.641588	4.91266	0.0802705	1.79876	0.366148	497.737	8.61619	503.289	19.4981	528.63	100.247	497.737	8.61619	94.1561
2MKT12-049	159.856	71549.4	0.959225	17.7164	2.8486	0.624962	2.93887	0.0803023	0.722781	0.245939	497.927	3.46344	492.953	11.4773	469.89	63.0771	497.927	3.46344	105.967
2MKT12-87	123.738	43045.2	1.17419	17.4664	3.71586	0.634879	4.00636	0.0804255	1.49778	0.373849	498.662	7.18728	499.13	15.7987	501.299	81.8344	498.662	7.18728	99.474
2MKT12-061	98.9708	19147.7	1.17962	17.7928	5.51832	0.623786	5.64126	0.0804968	1.17131	0.207632	499.088	5.62527	492.217	22.008	460.354	122.433	499.088	5.62527	108.414
2MKT12-015	21.5661	13496.1	0.509467	18.6178	21.7853	0.596611	22.5767	0.0805598	5.92523	0.262448	499.463	28.4771	475.081	85.8652	358.974	496.896	499.463	28.4771	139.136
2MKT12-041	189.066	39154.9	1.00157	17.5369	3.85017	0.633391	4.02047	0.0805607	1.15773	0.28796	499.469	5.56417	498.206	15.8315	492.412	84.9231	499.469	5.56417	101.433
2MKT12-056	106.792	34203.2	0.839481	17.704	4.16834	0.627853	4.4708	0.0806171	1.61646	0.361561	499.805	7.77391	494.757	17.5106	471.457	92.2786	499.805	7.77391	106.013
2MKT12-93	152.124	31113.5	1.16408	17.3327	1.90021	0.641753	3.62681	0.0806738	3.08917	0.851759	500.143	14.8661	503.391	14.3961	518.158	41.7155	500.143	14.8661	96.5232
2MKT12-91	60.0159	20165.6	0.931897	17.648	6.85775	0.631512	7.26594	0.0808305	2.40107	0.330456	501.078	11.5755	497.037	28.5646	478.449	151.755	501.078	11.5755	104.73
2MKT12-070	46.1543	14715.9	1.65028	16.5664	10.0729	0.672811	10.4124	0.0808391	2.6372	0.253274	501.129	12.7152	522.42	42.5483	616.592	218.003	501.129	12.7152	81.274
2MKT12-018	158.28	63920.4	1.15056	17.6213	2.18378	0.633021	2.3567	0.080901	0.88609	0.375987	501.499	4.27528	497.976	9.27625	481.835	48.265	501.499	4.27528	104.081
2MKT12-068	27.0114	8459.29	1.44568	18.5262	11.697	0.602198	12.0957	0.080914	3.08028	0.254658	501.576	14.8642	478.627	46.1939	370.096	264.257	501.576	14.8642	135.526
2MKT12-021	48.3954	27069.6	1.4713	17.7537	9.40698	0.628919	9.51097	0.080981	1.40259	0.14747	501.975	6.77349	495.422	37.3031	465.229	208.793	501.975	6.77349	107.899
2MKT12-97	721.982	23963.5	1.32244	17.2325	0.613569	0.64937	0.827032	0.0811593	0.554541	0.670519	503.039	2.68349	508.091	3.30619	530.917	13.4501	503.039	2.68349	94.749
2MKT12-016	644.822	148610	0.408869	17.4306	1.07139	0.642695	1.24928	0.0812486	0.642513	0.514308	503.571	3.11237	503.973	4.96295	505.816	23.5703	503.571	3.11237	99.5562
2MKT12-066	104.689	33846.3	1.34294	18.0103	6.08374	0.62265	6.20151	0.0813324	1.20284	0.193959	504.071	5.83217	491.507	24.1673	433.355	135.611	504.071	5.83217	116.318
2MKT12-047	66.7248	33055.9	1.01435	18.2807	10.741	0.613765	10.9949	0.0813757	2.34917	0.21366	504.329	11.396	485.932	42.4851	400.057	241.281	504.329	11.396	126.064
2MKT12-060	69.1719	35470.3	1.15174	17.8629	7.38917	0.628165	7.51163	0.0813812	1.35081	0.179829	504.362	6.55325	494.952	29.4348	451.633	164.278	504.362	6.55325	111.675
2MKT12-82	211.935	77199.9	0.202443	17.6742	1.33504	0.63505	1.6304	0.0814041	0.935889	0.574023	504.498	4.54152	499.237	6.42996	475.21	29.5266	504.498	4.54152	106.163
2MKT12-88	87.9989	33593.1	0.576897	17.2071	4.50025	0.65329	4.71051	0.0815293	1.39162	0.295429	505.245	6.76262	510.501	18.9019	534.096	98.5898	505.245	6.76262	94.5981
2MKT12-069	33.9055	9223.59	0.667655	18.2556	18.4483	0.61582	18.571	0.0815357	2.13112	0.114755	505.283	10.357	487.224	71.9866	403.141	416.283	505.283	10.357	125.336
2MKT12-019	243.615	95681.4	0.708963	17.3917	2.38163	0.646973	2.63071	0.0816071	1.11735	0.424734	505.708	5.43458	506.614	10.4934	510.706	52.3458	505.708	5.43458	99.0215
2MKT12-86	268.706	185563	0.722604	17.5703	1.18815	0.640954	3.02097	0.081678	2.77751	0.919409	506.131	13.5201	502.897	11.9819	488.23	26.2182	506.131	13.5201	103.666
2MKT12-050	165.77	50964.3	1.01091	17.4496	3.01466	0.645406	3.28636	0.0816801	1.30842	0.398136	506.144	6.36916	505.648	13.0897	503.39	66.3703	506.144	6.36916	100.547
2MKT12-053	226.186	140226	2.06338	17.4367	2.56067	0.646875	2.6711	0.0818056	0.760096	0.284563	506.891	3.70528	506.554	10.6536	505.01	56.3568	506.891	3.70528	100.372
2MKT12-010	93.2067	50650	1.55785	17.6634	3.89115	0.638879	4.07005	0.081845	1.19344	0.293225	507.126	5.82032	501.612	16.1116	476.518	86.0626	507.126	5.82032	106.423
2MKT12-100	638.388	209536	0.656998	17.3834	0.99045	0.649963	1.3114	0.0819448	0.859522	0.655423	507.721	4.19655	508.456	5.24546	511.742	21.7738	507.721	4.19655	99.2143
2MKT12-045	76.8208	37495.7	1.15379	17.7422	7.22273	0.639553	7.75941	0.0822968	2.8356	0.36544	509.817	13.8995	502.03	30.7427	466.668	160.161	509.817	13.8995	109.246
2MKT12-046	30.636	4122.51	0.725345	15.6723	20.7925	0.728314	22.8435	0.0827846	9.46028	0.414134	512.722	46.6269	555.563	98.0473	735.258	444.704	512.722	46.6269	69.7336
2MKT12-037	57.425	3682.79	0.621713	16.1671	9.54453	0.714031	10.1242	0.0837236	3.3766	0.333518	518.31	16.8162	547.137	42.8496	669.079	204.692	518.31	16.8162	77.4662
2MKT12-062	78.6646	77298.5	3.76961	12.8123	2.87585	2.09828	3.00352	0.19498	0.866374	0.288453	1148.29	9.11282	1148.24	20.6568	1148.14	57.1353	1148.14	57.1353	100.013
2MKT12-025	122.342	100497	1.13687	11.0267	0.545004	3.17567	0.82017	0.253968	0.612903	0.747287	1458.91	8.00209	1451.26	6.33358	1440.06	10.3881	1440.06	10.3881	101.309
2MKT12-76	139.815	141200	0.846242	10.9578	0.538931	3.2282	4.52294	0.256557	4.49071	0.992876	1472.2	59.1081	1463.96	35.0775	1452	10.2558	1452	10.2558	101.392
2MKT12-075	23.3308	35037.5	0.677229	10.8951	3.37393	3.14739	3.70747	0.248702	1.53687	0.414532	1431.78	19.7322	1444.36	28.5758	1462.92	64.1273	1462.92	64.1273	97.8714
2MKT12-044	228.95	57155.2	0.931547	10.2206	0.553766	3.52498	3.63742	0.261296	3.59502	0.988343	1496.47	48.0114	1532.84	28.7793	1583.36	10.3545	1583.36	10.3545	94.5123
2MKT12-072	311.84	15254	1.41873	9.83481	0.411532	3.37633	4.06065	0.24083	4.03974	0.994851	1391.01	50.545	1498.92	31.8201	1654.99	7.6252	1654.99	7.6252	84.0494
2MKT12-071	254.106	674905	2.60606	9.69719	0.448385	4.27004	0.965128	0.300315	0.854648	0.885528	1692.87	12.7243	1687.61	7.94039	1681.05	8.28055	1681.05	8.28055	100.703
2MKT12-024	176.335	100481	3.00221	9.62528	0.595335	4.34647	1.15084	0.303423	0.984886	0.8558	1708.26	14.7798	1702.22	9.50005	1694.79	10.9735	1694.79	10.9735	100.795
2MKT12-048	236.525	290620	3.6454	9.55472	0.400018	4.43578	1.41662	0.307388	1.35897	0.959304	1727.84	20.5974	1719.05	11.7385	1708.34	7.36014	1708.34	7.36014	101.142
2MKT12-80	184.665	341833	2.92643	9.53907	0.255506	4.51248	1.52809	0.312191	1.50658	0.985922	1751.48	23.1066	1733.27	12.702	1711.35	4.70051	1711.35	4.70051	102.345
2MKT12-83	57.1245	120237	0.936207	9.5082	0.981342	4.46278	1.35751	0.307753	0.937983	0.690956	1729.64	14.2295	1724.08	11.2612	1717.31	18.0387	1717.31	18.0387	100.718
2MKT12-032	139.027	108424	2.1551	9.50286	0.608214	4.4332	2.05894	0.305542	1.96705	0.955373	1718.73	29.6768	1718.56	17.0599	1718.35	11.1794	1718.35	11.1794	100.022
2MKT12-051	146.894	165372	1.30675	9.47426	0.460395	4.58166	1.0134	0.314823	0.902784	0.890846	1764.4	13.9349	1745.94	8.44658	1723.88	8.45647	1723.88	8.45647	102.35
2MKT12-004	158.036	145212	1.27641	9.47306	0.581868	4.43599	1.00688	0.304775	0.821728	0.816113	1714.94	12.3734	1719.09	8.34313	1724.12	10.6874	1724.12	10.6874	99.468
2MKT12-85	186.939	313630	1.81343	9.44867	0.651242	4.43567	1.46523	0.303969	1.31255	0.895796	1710.96	19.7241	1719.03	12.1412	1728.85	11.9545	1728.85	11.9545	98.9652
2MKT12-039	177.608	188351	1.17766	9.44422	0.307336	4.52124	1.16923	0.309686	1.12811	0.964836	1739.16	17.196	1734.89	9.72217	1729.72	5.64095	1729.72	5.64095	100.546
2MKT12-036	186.506	250063	1.81491	9.42371	0.526855	4.64745	1.07467	0.31764	0.936665	0.871583	1778.19	14.556	1757.83	8.98005	1733.7	9.66351	1733.7	9.66351	102.566
2MKT12-94	35.6787	57422.5	2.15481	9.31794	1.7405	4.56317	2.29105	0.308379	1.48982	0.650278	1732.73	22.6363	1742.57	19.0836	1754.38	31.8465	1754.38	31.8465	98.7656
2MKT12-029	159.31	35991	1.27531	9.29682	0.317151	4.28973	0.73462	0.289243	0.662632	0.902007	1637.75	9.5834	1691.39	6.04915	1758.53	5.80023	1758.53	5.80023	93.1315
2MKT12-055	367.814	87624.9	3.9355	9.22536	0.235447	4.45567	0.615255	0.298123	0.568422	0.92388	1681.99	8.41529	1722.76	5.10216	1772.63	4.29843	1772.63	4.29843	94.8869
2MKT12-98	511.099	428976	4.86176	9.21754	0.176743	4.32507	1.54613	0.289139	1.53599	0.993445	1637.23	22.2084	1698.15	12.7516	1774.18	3.22608	1774.18	3.22608	92.2807
2MKT12-073	428.257	445400	3.23963	9.19304	0.209717	4.84506	0.949091	0.323041	0.92563	0.975281	1804.56	14.5694	1792.76	7.98834	1779.04	3.82386	1779.04	3.82386	101.435
2MKT12-77	363.723	650376	3.68673	9.18984	0.204937	4.82708	0.590095	0.321729	0.553365	0.937756	1798.17	8.68318	1789.63	4.96351	1779.67	3.73637	1779.67	3.73637	101.039
2MKT12-022	168.279	434202	2.73016	9.1825	0.509559	4.82604	0.921434	0.321404	0.767718	0.833177	1796.58	12.0375	1789.45	7.75033	1781.12	9.29127	1781.12	9.29127	100.868
2MKT12-021	375.423	672277	2.15084	9.17331	0.197925	4.91921	1.13761	0.32728	1.12026	0.984749	1825.18	17.8072	1805.56	9.59992	1782.95	3.60703	1782.95	3.60703	102.369
2MKT12-011	268.693	480907	3.6691	9.15332	0.227271	4.83638	0.928185	0.321069	0.89993	0.96956	1794.95	14.0994	1791.25	7.80998	1786.93	4.1419	1786.93	4.1419	100.449
2MKT12-017	513.403	371486	2.48226	9.14897	0.160494	4.89132	0.628965	0.324562	0.608143	0.966896	1811.97	9.60615	1800.76	5.30241	1787.79	2.92461	1787.79	2.92461	101.352
2MKT12-96	250.453	410121	1.84837	9.14748	0.366632	4.85211	1.33177	0.321907	1.28031	0.96136	1799.04	20.0986	1793.98	11.2123	1788.09	6.68073	1788.09	6.68073	100.612
2MKT12-008	206.583	56289.9	1.3087	9.01814	0.936407	4.70166	2.37019	0.307515	2.17737	0.918648	1728.47	33.0121	1767.53	19.848	1814	17.0073	1814	17.0073	95.2851
2MKT12-007	89.4248	104624	2.34097	8.83694	0.567772	5.17915	0.894114	0.331939	0.690707	0.772504	1847.77	11.0965	1849.2	7.60958	1850.78	10.265	1850.78	10.265	99.8377
2MKT12-79	49.8127	155266	3.67853	8.80815	1.05694	5.29098	2.0258	0.338002	1.72822	0.853104	1877.05	28.1438	1867.41	17.3016	1856.67	19.0974	1856.67	19.0974	101.097
2MKT12-92	451.46	661921	6.95691	8.70091	0.255763	5.45036	1.19067	0.343945	1.16287	0.976657	1905.62	19.1849	1892.81	10.2159	1878.78	4.60931	1878.78	4.60931	101.428
2MKT12-026	184.582	36156.1	1.02625	6.01586	0.381909	9.68971	1.50827	0.422773	1.45912	0.967411	2273.06	27.9501	2405.73	13.8829	2520	6.4169	2520	6.4169	90.2007
2MKT12-009	356.667	210771	4.0926	6.01475	0.236851	10.4091	0.867951	0.454079	0.83501	0.962047	2413.36	16.8095	2471.86	8.04075	2520.3	3.97948	2520.3	3.97948	95.7568
2MKT12-006	147.937	240581	1.32687	5.90145	0.249455	11.3458	0.994488	0.485614	0.962694	0.968029	2551.67	20.2858	2551.98	9.2802	2552.2	4.17503	2552.2	4.17503	99.9792
2MKT12-064	315.336	143991	1.24045	5.67191	0.896219	10.894	8.00775	0.448141	7.95744	0.993717	2386.98	158.775	2514.12	74.6071	2618.43	14.9147	2618.43	14.9147	91.161
2MKT12-027	361.28	753746	3.82453	5.65321	0.0999812	12.5292	0.577551	0.513708	0.568831	0.984902	2672.44	12.4445	2644.92	5.43094	2623.92	1.66294	2623.92	1.66294	101.849
2MKT12-003	180.005	37128.5	1.19663	5.40903	0.217427	12.428	1.54883	0.487549	1.5335	0.990098	2560.06	32.4005	2637.3	14.5564	2697.09	3.59149	2697.09	3.59149	94.9195
2MKT12-028	95.994	111766	1.56493	5.27799	0.396608	12.846	1.24875	0.491741	1.18409	0.948223	2578.2	25.1622	2668.43	11.7644	2737.52	6.52318	2737.52	6.52318	94.1804
2MKT12-033	521.723	429510	1.72315	4.98817	0.412925	14.4387	1.44295	0.522357	1.3826	0.95818	2709.17	30.5823	2778.98	13.7033	2830.05	6.73428	2830.05	6.73428	95.7285
2MKT12-005	248.778	39997.1	0.811052	4.86247	0.218754	14.3482	6.76423	0.506004	6.76069	0.999477	2639.55	146.458	2773.01	64.2937	2871.62	3.55629	2871.62	3.55629	91.9186
2MKT12-043	199.698	511562	2.86145	4.52108	0.0981386	18.3017	1.201	0.600111	1.19698	0.996656	3030.28	28.9394	3005.73	11.5634	2989.33	1.57518	2989.33	1.57518	101.37
2MKT12-042	96.904	212008	1.73413	3.79189	0.29333	23.8214	1.42006	0.655122	1.38943	0.978434	3248.18	35.453	3261.11	13.839	3269.07	4.61359	3269.07	4.61359	99.3612
2MKT12-067	79.4446	2.01024e+06	1.1777	3.40176	0.312264	28.863	0.727909	0.712103	0.657527	0.90331	3466.38	17.6297	3448.87	7.14368	3438.71	4.84888	3438.71	4.84888	100.805
Table 03-MKT-12. U-Pb geochronologic analyses.
							Isotope ratios						Apparent ages (Ma)
Analysis	U	206Pb	U/Th	206Pb*	±	207Pb*	±	206Pb*	±	error	206Pb*	±	207Pb*	±	206Pb*	±	Best age	±	Conc
	(ppm)	204Pb		207Pb*	(%)	235U*	(%)	238U	(%)	corr.	238U*	(Ma)	235U	(Ma)	207Pb*	(Ma)	(Ma)	(Ma)	(%)
3MKT12-008	27.0225	11111.9	0.484496	19.047	15.8829	0.57451	16.9144	0.0793639	5.8163	0.343867	492.325	27.5691	460.927	62.7466	307.34	363.748	492.325	27.5691	160.189
3MKT12-38	207.435	107704	1.39217	17.3636	2.1533	0.631524	2.40447	0.0795294	1.06994	0.44498	493.313	5.08125	497.045	9.45056	514.289	47.2974	493.313	5.08125	95.9213
3MKT12-023	97.8254	49394.8	0.844988	17.2812	4.52816	0.634946	4.62243	0.0795812	0.928794	0.200932	493.622	4.4136	499.172	18.2297	524.68	99.3407	493.622	4.4136	94.0807
3MKT12-080	55.7035	4798.44	0.679322	16.9219	7.91829	0.649418	8.36179	0.0797027	2.68704	0.321347	494.348	12.7868	508.12	33.441	570.586	172.533	494.348	12.7868	86.6387
3MKT12-059	102.725	38415.8	1.20259	17.2661	4.55333	0.637371	4.72316	0.0798151	1.25516	0.265746	495.019	5.98074	500.677	18.6705	526.64	99.8611	495.019	5.98074	93.9957
3MKT12-061	144.227	67698.3	1.00147	17.431	2.86335	0.631759	3.30888	0.0798681	1.65828	0.50116	495.336	7.90639	497.191	13.0086	505.765	63.0242	495.336	7.90639	97.938
3MKT12-101	61.6431	16421.7	0.570456	17.3086	5.67351	0.636272	5.93895	0.0798736	1.75568	0.295621	495.368	8.37131	499.995	23.4533	521.21	124.595	495.368	8.37131	95.042
3MKT12-047	45.8166	8344.92	0.962866	17.1506	6.78032	0.64224	7.22544	0.0798868	2.49685	0.345563	495.447	11.9071	503.692	28.6993	541.3	148.414	495.447	11.9071	91.529
3MKT12-077	28.6966	11027.6	0.745324	16.5596	20.4767	0.665616	20.7049	0.0799415	3.06563	0.148063	495.774	14.6289	518.043	84.2065	617.484	446.342	495.774	14.6289	80.2893
3MKT12-015	128.317	43155.2	0.731855	17.9223	4.95956	0.616963	5.09612	0.0801958	1.17184	0.229947	497.292	5.60834	487.942	19.7462	444.255	110.331	497.292	5.60834	111.938
3MKT12-084	44.6369	16261.7	0.727407	17.8112	11.5635	0.621403	12.0528	0.0802721	3.39937	0.28204	497.747	16.2836	490.726	46.9363	458.088	257.229	497.747	16.2836	108.657
3MKT12-45	37.4636	14518.4	1.59806	16.9686	6.17771	0.652666	6.44864	0.0803223	1.84956	0.286814	498.047	8.86483	510.118	25.8641	564.573	134.688	498.047	8.86483	88.2165
3MKT12-060	268.748	150240	1.47043	17.3655	1.38436	0.639931	2.0046	0.0805969	1.44983	0.723248	499.685	6.97091	502.263	7.94283	514.023	30.3923	499.685	6.97091	97.2107
3MKT12-007	172.568	82573.8	1.16972	17.5081	3.93146	0.634866	4.15499	0.0806156	1.34444	0.323573	499.796	6.46559	499.123	16.3847	496.016	86.6634	499.796	6.46559	100.762
3MKT12-014	144.352	56905.3	0.932516	17.198	3.28255	0.646562	4.00897	0.0806466	2.30145	0.574076	499.981	11.0719	506.361	15.9857	535.262	71.856	499.981	11.0719	93.4087
3MKT12-18	58.2369	21675.4	0.588964	17.1558	8.7059	0.648295	8.88458	0.0806644	1.77287	0.199545	500.087	8.53074	507.429	35.4962	540.662	190.716	500.087	8.53074	92.4954
3MKT12-022	21.5256	12360.9	0.509659	16.5086	10.0588	0.673962	10.3358	0.0806947	2.37695	0.229973	500.268	11.4415	523.118	42.278	624.134	217.403	500.268	11.4415	80.154
3MKT12-062	140.264	43010.9	1.08731	17.0959	2.07744	0.650872	2.18207	0.0807023	0.667586	0.305942	500.313	3.2137	509.015	8.73558	548.322	45.3732	500.313	3.2137	91.2444
3MKT12-050	64.3351	25431.9	1.29446	17.2392	5.97401	0.646776	6.23667	0.0808666	1.7909	0.287157	501.293	8.63749	506.493	24.8765	530.062	130.985	501.293	8.63749	94.5725
3MKT12-093	465.918	297440	0.918148	17.4097	1.06482	0.641366	1.38719	0.0809833	0.889076	0.640918	501.99	4.29372	503.152	5.50391	508.46	23.4253	501.99	4.29372	98.7274
3MKT12-031	212.74	84334	0.725535	17.3242	0.995017	0.644863	1.84332	0.0810251	1.5517	0.841796	502.239	7.4974	505.312	7.33798	519.229	21.8352	502.239	7.4974	96.7277
3MKT12-029	63.0493	2905.12	1.16253	15.4821	10.8687	0.721898	11.2227	0.0810598	2.79639	0.249173	502.445	13.5168	551.786	47.8098	761.007	229.791	502.445	13.5168	66.0237
3MKT12-42	146.291	56693.2	2.46972	17.6649	2.65188	0.632984	2.73339	0.0810965	0.662539	0.242388	502.664	3.20382	497.953	10.7587	476.352	58.6537	502.664	3.20382	105.524
3MKT12-97	107.167	29447.5	0.873724	16.7729	5.67653	0.666794	5.78606	0.0811144	1.1205	0.193654	502.771	5.41944	518.761	23.5072	589.823	123.198	502.771	5.41944	85.241
3MKT12-026	72.4422	65753.7	1.50821	16.9468	4.99248	0.662277	5.13136	0.0814002	1.18576	0.231081	504.475	5.75381	516.006	20.7615	567.42	108.766	504.475	5.75381	88.9069
3MKT12-054	132.065	8730.83	1.06357	17.1249	3.75376	0.656129	4.02588	0.0814924	1.45501	0.361414	505.024	7.06769	512.243	16.1966	544.568	82.0396	505.024	7.06769	92.7386
3MKT12-064	89.786	40878.7	1.02072	17.1838	4.74597	0.654299	4.84401	0.0815446	0.969636	0.200172	505.335	4.71278	511.121	19.4559	537.062	103.925	505.335	4.71278	94.0927
3MKT12-67	95.4667	33087.7	1.83781	17.2039	5.18183	0.656012	5.28435	0.0818536	1.03589	0.196031	507.177	5.05246	512.172	21.2586	534.547	113.508	507.177	5.05246	94.8798
3MKT12-081	23.318	19514.4	1.10922	18.6163	16.3007	0.608735	16.5343	0.0821903	2.76895	0.167468	509.183	13.5566	482.762	63.6101	359.156	370.037	509.183	13.5566	141.772
3MKT12-089	34.7246	16224	1.21679	17.3099	10.5824	0.654991	10.7949	0.0822296	2.1315	0.197454	509.417	10.4403	511.546	43.4065	521.049	232.767	509.417	10.4403	97.7677
3MKT12-091	44.4682	30694.4	1.22776	17.0492	8.67341	0.685707	8.87811	0.0847894	1.89548	0.213501	524.647	9.55068	530.218	36.6856	554.28	189.561	524.647	9.55068	94.6538
3MKT12-065	21.3257	2105.64	0.609904	16.9305	13.5694	0.692301	14.7564	0.0850088	5.79849	0.392947	525.951	29.2865	534.182	61.3701	569.512	296.53	525.951	29.2865	92.3511
3MKT12-075	511.334	328706	4.32894	16.8661	0.918899	0.746814	1.21703	0.0913536	0.797986	0.655684	563.537	4.306	566.374	5.28324	577.778	19.9629	563.537	4.306	97.5352
3MKT12-046	43.7095	3671.38	1.18085	15.9097	18.2459	0.799775	20.2707	0.0922846	8.83127	0.435666	569.035	48.0997	596.702	91.7123	703.335	391.361	569.035	48.0997	80.9052
3MKT12-083	237.095	34791.3	1.21965	11.356	0.807239	2.68411	1.30077	0.221067	1.01999	0.784139	1287.51	11.9041	1324.09	9.62303	1383.76	15.5048	1383.76	15.5048	93.0439
3MKT12-057	79.9456	94630.7	0.888001	11.0755	0.820669	3.17124	1.52988	0.254736	1.29114	0.843947	1462.85	16.8978	1450.18	11.8106	1431.64	15.6604	1431.64	15.6604	102.18
3MKT12-20	74.8926	39676.5	1.70426	11.0015	1.63031	3.15278	1.92195	0.251561	1.01784	0.529586	1446.52	13.1883	1445.68	14.8169	1444.42	31.0582	1444.42	31.0582	100.145
3MKT12-44	45.4634	69088	1.47649	10.9758	1.45188	3.18401	1.97273	0.253459	1.33556	0.67701	1456.29	17.4093	1453.29	15.2445	1448.88	27.6421	1448.88	27.6421	100.511
3MKT12-028	167.536	228341	0.669575	10.7481	0.744561	3.34513	1.06704	0.260761	0.764331	0.71631	1493.73	10.1908	1491.65	8.34123	1488.68	14.0994	1488.68	14.0994	100.339
3MKT12-072	86.1737	68801.1	0.86324	9.90482	0.64707	4.04698	1.04212	0.290721	0.816896	0.783877	1645.13	11.8612	1643.69	8.48512	1641.83	12.0098	1641.83	12.0098	100.201
3MKT12-024	66.0941	130661	1.3394	9.67146	0.747285	4.34241	1.19223	0.304594	0.928972	0.779185	1714.05	13.9819	1701.45	9.84009	1685.96	13.792	1685.96	13.792	101.666
3MKT12-39	64.8982	70823.7	1.24315	9.64175	0.760097	4.30781	1.73095	0.301239	1.55513	0.898428	1697.45	23.2082	1694.86	14.2654	1691.64	14.0166	1691.64	14.0166	100.344
3MKT12-99	131.066	112414	0.822642	9.60147	0.585154	4.2523	1.21175	0.296115	1.0611	0.875676	1672.01	15.6276	1684.18	9.96166	1699.35	10.7796	1699.35	10.7796	98.3913
3MKT12-43	117.399	137917	1.02409	9.56487	0.493488	4.41556	0.907731	0.306311	0.76187	0.839312	1722.53	11.5164	1715.26	7.51515	1706.38	9.08259	1706.38	9.08259	100.946
3MKT12-16	312.13	25306	1.53199	9.5378	0.226393	4.29849	1.32871	0.297347	1.30929	0.985378	1678.14	19.3447	1693.07	10.9457	1711.6	4.16479	1711.6	4.16479	98.0452
3MKT12-030	201.508	248980	7.5983	9.525	0.40579	4.49442	1.06319	0.310482	0.98271	0.924299	1743.08	15.0089	1729.94	8.83091	1714.07	7.46271	1714.07	7.46271	101.693
3MKT12-010	172.94	350579	2.0409	9.52276	0.315043	4.1976	2.12558	0.289909	2.10211	0.988955	1641.08	30.4564	1673.55	17.4321	1714.5	5.7935	1714.5	5.7935	95.7174
3MKT12-073	191.698	231365	1.78911	9.5156	0.458601	4.50096	1.71523	0.310627	1.65278	0.963594	1743.79	25.252	1731.15	14.251	1715.88	8.43202	1715.88	8.43202	101.627
3MKT12-095	296.616	48734.7	1.90504	9.51432	0.293148	3.90799	1.12727	0.269669	1.08848	0.965595	1539.12	14.9033	1615.34	9.1142	1716.13	5.38976	1716.13	5.38976	89.6855
3MKT12-049	284.794	119084	2.41739	9.50847	0.334147	4.45893	1.28638	0.307496	1.24223	0.965674	1728.37	18.833	1723.36	10.6694	1717.26	6.14268	1717.26	6.14268	100.647
3MKT12-091	102.223	160355	1.79416	9.50413	0.538363	4.41133	0.87492	0.304075	0.689674	0.788271	1711.48	10.3667	1714.47	7.24221	1718.1	9.89581	1718.1	9.89581	99.6149
3MKT12-66	252.95	180695	3.85879	9.50192	0.398083	4.5331	1.5902	0.312396	1.53957	0.968159	1752.48	23.6243	1737.06	13.2292	1718.53	7.31686	1718.53	7.31686	101.976
3MKT12-079	112.651	222134	0.93873	9.50025	0.730981	4.47003	1.1159	0.307995	0.843144	0.755575	1730.84	12.7985	1725.42	9.25948	1718.85	13.4352	1718.85	13.4352	100.697
3MKT12-37	393.269	34047.6	2.00626	9.49673	0.418467	4.16106	1.74466	0.2866	1.69373	0.970808	1624.52	24.3219	1666.39	14.2835	1719.53	7.69056	1719.53	7.69056	94.4744
3MKT12-021	279.676	399673	4.79539	9.48963	0.223873	4.52291	1.57768	0.31129	1.56171	0.989881	1747.05	23.8995	1735.19	13.1197	1720.91	4.1136	1720.91	4.1136	101.519
3MKT12-011	87.5644	180699	1.55783	9.46957	0.671535	4.54914	1.51718	0.312434	1.36047	0.896709	1752.67	20.878	1740	12.6297	1724.79	12.3333	1724.79	12.3333	101.616
3MKT12-009	89.3881	193330	0.759162	9.45934	0.606251	4.46845	1.88636	0.306561	1.78628	0.946948	1723.76	27.0183	1725.13	15.6524	1726.78	11.1315	1726.78	11.1315	99.8252
3MKT12-078	444.061	285323	1.6335	9.45251	0.227012	4.51182	2.42866	0.309313	2.41802	0.995622	1737.32	36.8246	1733.15	20.1888	1728.1	4.16749	1728.1	4.16749	100.533
3MKT12-074	110.544	85517.8	1.52862	9.44225	0.715168	4.51305	1.14981	0.309061	0.900334	0.783028	1736.08	13.7027	1733.38	9.55757	1730.1	13.1242	1730.1	13.1242	100.346
3MKT12-002	128.026	297823	2.35652	9.43434	0.53103	4.51688	1.16209	0.309064	1.03367	0.889487	1736.1	15.7321	1734.08	9.66116	1731.64	9.74441	1731.64	9.74441	100.258
3MKT12-075	85.9678	84651.6	1.25819	9.42865	0.473269	4.56229	1.18055	0.311983	1.08153	0.916126	1750.46	16.5791	1742.41	9.83232	1732.74	8.68327	1732.74	8.68327	101.022
3MKT12-052	249.034	105340	1.85762	9.41294	0.250509	4.46557	2.88972	0.30486	2.87884	0.996235	1715.37	43.359	1724.6	23.9777	1735.8	4.5944	1735.8	4.5944	98.8227
3MKT12-086	103.388	144610	1.87696	9.33091	0.502757	4.71411	1.08757	0.319024	0.964392	0.886737	1784.96	15.0364	1769.75	9.11069	1751.84	9.20242	1751.84	9.20242	101.891
3MKT12-19	530.037	78833.9	2.76401	9.32211	0.214416	4.00133	1.58156	0.270531	1.56696	0.990767	1543.5	21.5085	1634.47	12.8487	1753.56	3.92379	1753.56	3.92379	88.0207
3MKT12-69	235.047	27167.2	1.09371	9.22698	0.348194	4.4736	1.66734	0.299375	1.63057	0.977951	1688.21	24.2182	1726.09	13.8377	1772.31	6.35706	1772.31	6.35706	95.2547
3MKT12-17	574.553	106030	2.65302	9.22525	0.173512	4.52159	2.73203	0.30253	2.72652	0.997981	1703.84	40.8237	1734.95	22.7204	1772.65	3.1677	1772.65	3.1677	96.118
3MKT12-004	64.8357	195409	2.49805	9.20244	1.00577	4.76669	1.40482	0.31814	0.980787	0.698157	1780.64	15.2599	1779.05	11.7913	1777.17	18.3503	1777.17	18.3503	100.195
3MKT12-076	42.9818	83901.5	1.06483	9.18814	1.63202	4.77108	2.4587	0.317939	1.83895	0.747936	1779.65	28.5982	1779.82	20.6422	1780.01	29.768	1780.01	29.768	99.9803
3MKT12-027	301.493	419730	1.3205	9.18373	0.121515	4.85476	0.877321	0.323359	0.868865	0.990361	1806.11	13.6861	1794.44	7.38677	1780.88	2.21438	1780.88	2.21438	101.417
3MKT12-051	159.089	43689.1	1.73962	9.17728	0.364636	4.93739	2.61572	0.328632	2.59018	0.990236	1831.75	41.301	1808.67	22.0898	1782.16	6.64737	1782.16	6.64737	102.782
3MKT12-087	202.978	207089	4.42149	9.17521	0.279255	4.92372	0.923854	0.327649	0.880638	0.953222	1826.98	14.0101	1806.33	7.79724	1782.57	5.09019	1782.57	5.09019	102.491
3MKT12-088	316.722	102687	1.65367	9.16997	0.281839	4.69915	0.773705	0.312526	0.720546	0.931293	1753.12	11.0601	1767.09	6.4777	1783.61	5.13664	1783.61	5.13664	98.2905
3MKT12-100	252.803	347190	3.68618	9.15307	0.243732	4.85737	1.55568	0.322453	1.53647	0.987651	1801.7	24.1508	1794.89	13.1001	1786.98	4.44186	1786.98	4.44186	100.824
3MKT12-032	186.624	281753	3.28495	9.15264	0.408516	4.94199	1.47575	0.328055	1.41808	0.960922	1828.95	22.5815	1809.46	12.4634	1787.06	7.44305	1787.06	7.44305	102.344
3MKT12-025	228.457	432541	2.99416	9.14416	0.233091	4.83101	0.796788	0.320391	0.761931	0.956254	1791.64	11.9182	1790.31	6.70306	1788.75	4.24699	1788.75	4.24699	100.161
3MKT12-034	118.554	218647	1.77824	9.14153	0.332881	4.96466	1.92226	0.32916	1.89322	0.984892	1834.31	30.224	1813.32	16.2474	1789.28	6.06482	1789.28	6.06482	102.517
3MKT12-063	224.216	138806	2.35683	9.03152	0.266819	4.91585	1.47313	0.322002	1.44877	0.98346	1799.5	22.7481	1804.98	12.4301	1811.3	4.84804	1811.3	4.84804	99.3482
3MKT12-96	271.323	23984.3	2.58608	9.00091	0.284125	4.39635	1.6189	0.286997	1.59377	0.984479	1626.51	22.9111	1711.65	13.3927	1817.47	5.15676	1817.47	5.15676	89.4931
3MKT12-035	322.645	554334	1.83715	6.45336	2.12711	9.02759	2.41441	0.422529	1.14227	0.473106	2271.95	21.8718	2340.8	22.0742	2401.36	36.1684	2401.36	36.1684	94.6111
3MKT12-085	295.369	201700	1.24406	6.19362	0.167791	10.1165	0.98604	0.454437	0.971659	0.985415	2414.95	19.571	2445.48	9.11168	2470.95	2.83308	2470.95	2.83308	97.7334
3MKT12-090	137.902	326015	1.70558	6.16012	0.415013	10.8357	0.864797	0.484112	0.758708	0.877325	2545.15	15.9541	2509.14	8.03926	2480.11	7.00084	2480.11	7.00084	102.623
3MKT12-36	282.554	1.86867e+06	1.88786	5.87317	0.133177	11.6212	0.8457	0.495019	0.835148	0.987523	2592.35	17.8262	2574.38	7.90688	2560.24	2.22882	2560.24	2.22882	101.254
3MKT12-055	188.924	38565.5	1.05335	5.82574	0.177774	10.8752	0.798625	0.459502	0.778587	0.97491	2437.36	15.8019	2512.52	7.42638	2573.8	2.97121	2573.8	2.97121	94.6988
3MKT12-071	135.867	88375	1.09412	5.81737	0.232914	11.6301	4.32553	0.490691	4.31926	0.998549	2573.66	91.6594	2575.09	40.4647	2576.21	3.89186	2576.21	3.89186	99.9013
3MKT12-082	374.8	323141	1.43184	5.46583	0.261217	11.484	3.21193	0.455247	3.20129	0.996687	2418.54	64.5607	2563.28	30.0097	2679.83	4.32164	2679.83	4.32164	90.2496
3MKT12-003	267.88	911643	1.01319	4.82603	0.110645	16.256	1.14661	0.568988	1.14126	0.995333	2903.66	26.6802	2891.97	10.9682	2883.83	1.79306	2883.83	1.79306	100.688
3MKT12-058	179.796	405922	1.72758	4.82253	0.107273	16.5081	1.09031	0.577392	1.08502	0.995148	2938.1	25.6029	2906.7	10.4389	2885.01	1.74199	2885.01	1.74199	101.84
3MKT12-41	87.7214	238807	0.930306	4.61327	0.213758	17.5282	0.724604	0.586469	0.692357	0.955497	2975.09	16.4992	2964.2	6.96052	2956.81	3.44941	2956.81	3.44941	100.618
Table 07-MKT-12. U-Pb geochronologic analyses.
							Isotope ratios						Apparent ages (Ma)
Analysis	U	206Pb	U/Th	206Pb*	±	207Pb*	±	206Pb*	±	error	206Pb*	±	207Pb*	±	206Pb*	±	Best age	±	Conc
	(ppm)	204Pb		207Pb*	(%)	235U*	(%)	238U	(%)	corr.	238U*	(Ma)	235U	(Ma)	207Pb*	(Ma)	(Ma)	(Ma)	(%)
7MKT12-019	12.3316	3507.05	0.440701	24.3121	33.5081	0.434629	33.723	0.0766371	3.80065	0.112702	476.019	17.44	366.458	104.101	-279.398	873.598	476.019	17.44	NA
7MKT12-025	90.0484	20498.8	0.815667	16.3279	13.1385	0.656031	13.4514	0.0776881	2.88441	0.214431	482.308	13.4041	512.183	54.1584	647.861	283.325	482.308	13.4041	74.4463
7MKT12-018	75.2971	32090.7	0.840004	18.5613	6.60493	0.580515	6.71508	0.0781486	1.21124	0.180376	485.062	5.65966	464.792	25.0486	365.827	149.025	485.062	5.65966	132.593
7MKT12-058	21.3376	9593.56	0.496235	16.1655	14.6624	0.667573	15.2422	0.0782685	4.16385	0.273179	485.78	19.4839	519.236	62.0342	669.279	315.372	485.78	19.4839	72.5825
7MKT12-083	189.871	6073.19	0.739283	17.0036	3.47341	0.635974	4.46324	0.0784293	2.80284	0.627984	486.741	13.1403	499.811	17.6192	560.121	75.7406	486.741	13.1403	86.8992
7MKT12-022	74.9981	22229.8	0.69394	17.1903	7.79439	0.630636	8.03819	0.0786248	1.96469	0.244419	487.909	9.23212	496.492	31.5755	536.286	170.824	487.909	9.23212	90.9793
7MKT12-079	43.0181	11799.5	0.41813	17.7926	13.9773	0.609342	14.1562	0.0786321	2.2435	0.158482	487.953	10.5432	483.145	54.476	460.377	311.259	487.953	10.5432	105.99
7MKT12-037	48.0524	22627.5	0.617655	17.2356	8.32972	0.630007	8.60189	0.0787536	2.14667	0.249557	488.679	10.1025	496.1	33.7707	530.519	182.761	488.679	10.1025	92.1133
7MKT12-027	223.618	283755	0.760551	17.4156	2.32606	0.62374	3.05022	0.0787845	1.97314	0.646883	488.864	9.28927	492.189	11.8978	507.715	51.1718	488.864	9.28927	96.287
7MKT12-017	58.8309	24033.4	0.497876	18.4993	10.5417	0.58726	10.7705	0.0787922	2.20809	0.205013	488.91	10.3964	469.116	40.4835	373.371	237.888	488.91	10.3964	130.945
7MKT12-072	10.9752	5925	0.452571	18.6613	57.1991	0.583906	57.569	0.0790286	6.51576	0.113182	490.322	30.7637	466.968	218.818	353.729	1407.12	490.322	30.7637	138.615
7MKT12-085	40.1619	13885.9	1.00993	16.5575	9.32015	0.658316	9.54988	0.0790547	2.08207	0.21802	490.478	9.83326	513.583	38.5126	617.757	201.588	490.478	9.83326	79.3965
7MKT12-029	150.648	73340.8	1.04827	17.6755	2.42787	0.617588	2.69585	0.0791717	1.17177	0.434657	491.177	5.54165	488.335	10.4513	475.029	53.7227	491.177	5.54165	103.399
7MKT12-034	35.8137	7653.95	0.44207	16.1771	10.777	0.675105	10.9926	0.0792085	2.1665	0.197087	491.396	10.2505	523.812	45.0136	667.718	231.33	491.396	10.2505	73.5934
7MKT12-095	30.4478	14907.2	0.720308	17.5073	10.9126	0.624148	11.8744	0.0792512	4.6816	0.394259	491.651	22.1614	492.444	46.3667	496.142	241.098	491.651	22.1614	99.0949
7MKT12-035	85.6026	18789.9	0.789467	17.569	3.75355	0.622029	3.94446	0.0792603	1.21226	0.307332	491.706	5.7391	491.118	15.3604	488.368	82.8542	491.706	5.7391	100.684
7MKT12-076	43.231	15001.5	0.530821	17.0046	5.90676	0.643262	6.33952	0.0793328	2.30213	0.363139	492.139	10.908	504.324	25.2033	559.973	128.857	492.139	10.908	87.8862
7MKT12-087	78.3682	28367.8	0.368709	18.3987	4.91044	0.595073	5.27206	0.0794065	1.9189	0.363976	492.579	9.10002	474.102	19.9736	385.626	110.342	492.579	9.10002	127.735
7MKT12-045	26.5018	8836.17	0.616952	17.4598	14.3757	0.627663	14.7216	0.0794811	3.17273	0.215515	493.025	15.0592	494.639	57.7051	502.119	317.921	493.025	15.0592	98.1888
7MKT12-015	255.699	116868	0.895411	17.5695	1.05072	0.624562	1.40736	0.0795856	0.936296	0.665286	493.649	4.44948	492.703	5.49387	488.327	23.2059	493.649	4.44948	101.09
7MKT12-041	172.852	61536.5	0.720748	17.4374	1.67068	0.62946	3.01493	0.0796067	2.50971	0.832427	493.775	11.9296	495.759	11.8264	504.948	36.7794	493.775	11.9296	97.7873
7MKT12-038	56.8618	21963.5	0.487343	17.7124	5.44543	0.619854	5.84594	0.079628	2.12657	0.36377	493.902	10.1109	489.756	22.718	470.429	120.607	493.902	10.1109	104.99
7MKT12-013	350.865	149596	0.720279	17.412	1.01761	0.630873	1.34804	0.0796692	0.884123	0.655859	494.148	4.20563	496.64	5.2949	508.164	22.3992	494.148	4.20563	97.2419
7MKT12-070	185.836	75267.8	0.894952	17.1366	2.07382	0.641167	2.23523	0.0796884	0.833969	0.373102	494.263	3.96794	503.029	8.86709	543.122	45.3377	494.263	3.96794	91.004
7MKT12-0412	59.899	33297.9	0.690525	18.3823	4.44489	0.598402	4.63608	0.0797794	1.31765	0.284217	494.806	6.27588	476.219	17.6251	387.636	99.845	494.806	6.27588	127.647
7MKT12-008	107.995	38440.1	0.986657	17.4154	4.22439	0.632099	5.17149	0.0798396	2.98309	0.576835	495.165	14.2182	497.403	20.3396	507.733	92.9398	495.165	14.2182	97.5247
7MKT12-016	133.563	45738.5	0.428721	17.7793	3.25918	0.619423	4.64026	0.0798731	3.303	0.711814	495.365	15.7491	489.486	18.0238	462.039	72.2726	495.365	15.7491	107.213
7MKT12-096	162.287	44235.3	0.797005	17.5357	2.5557	0.628083	3.06201	0.07988	1.68651	0.550785	495.406	8.04212	494.901	11.9949	492.555	56.3807	495.406	8.04212	100.579
7MKT12-032	235.118	119344	0.682994	17.667	1.74621	0.623557	1.84853	0.0798982	0.606485	0.32809	495.515	2.89263	492.074	7.20897	476.083	38.6143	495.515	2.89263	104.082
7MKT12-026	280.167	116249	0.770173	17.5268	1.34094	0.628968	1.60313	0.0799519	0.878584	0.548041	495.835	4.19301	495.453	6.28523	493.681	29.554	495.835	4.19301	100.436
7MKT12-086	170.202	64819.9	0.799079	17.5615	2.20932	0.628053	2.32253	0.0799939	0.716255	0.308395	496.086	3.41997	494.882	9.09767	489.317	48.7488	496.086	3.41997	101.383
7MKT12-002	126.72	36304.4	0.569311	17.7341	3.09539	0.622002	3.28179	0.0800017	1.09029	0.332223	496.133	5.20636	491.101	12.7792	467.688	68.5607	496.133	5.20636	106.082
7MKT12-094	194.065	52756.1	0.858214	17.4817	2.36181	0.631057	2.50365	0.0800112	0.830729	0.331807	496.19	3.96735	496.754	9.83596	499.337	52.0383	496.19	3.96735	99.3698
7MKT12-082	18.5775	8262.97	0.428489	19.3422	26.4641	0.570355	26.6249	0.0800112	2.92166	0.109734	496.19	13.9531	458.244	98.4974	272.157	616.135	496.19	13.9531	182.318
7MKT12-023	282.794	195049	0.657577	17.3766	1.60635	0.635012	1.72186	0.0800285	0.620036	0.360097	496.293	2.96172	499.213	6.79039	512.613	35.3197	496.293	2.96172	96.8164
7MKT12-047	276.509	121895	0.696137	17.6435	1.2205	0.626039	1.44605	0.0801097	0.775534	0.536311	496.778	3.70797	493.626	5.65314	479.009	26.9855	496.778	3.70797	103.709
7MKT12-062	8.65023	6295.1	0.550032	16.0974	46.8397	0.68651	47.0841	0.0801498	4.79035	0.10174	497.017	22.9143	530.701	197.045	678.279	1058.48	497.017	22.9143	73.2761
7MKT12-069	228.201	93121.4	0.695154	17.38	2.71401	0.636054	2.82253	0.0801758	0.775129	0.274622	497.172	3.70887	499.86	11.1425	512.186	59.6533	497.172	3.70887	97.0686
7MKT12-006	206.504	212227	0.902219	17.2177	1.16277	0.642058	1.43197	0.0801767	0.835778	0.583654	497.177	3.9991	503.579	5.68532	532.791	25.4842	497.177	3.9991	93.3156
7MKT12-049	39.6915	14918.3	0.48377	17.8075	10.332	0.621206	10.5165	0.0802299	1.9611	0.186478	497.495	9.38941	490.603	40.9387	458.554	229.696	497.495	9.38941	108.492
7MKT12-021	243.712	58125.4	0.832891	17.582	1.30178	0.629186	1.60597	0.0802314	0.940481	0.585617	497.504	4.50294	495.588	6.29767	486.762	28.7255	497.504	4.50294	102.207
7MKT12-066	136.106	101681	0.477595	17.2523	4.19836	0.641322	4.34606	0.080246	1.12337	0.25848	497.591	5.37949	503.125	17.2445	528.39	92.0417	497.591	5.37949	94.1712
7MKT12-075	235.093	75314.9	0.821289	17.3498	1.41386	0.63774	1.53153	0.0802483	0.588721	0.384399	497.605	2.81929	500.906	6.05564	515.993	31.04	497.605	2.81929	96.4363
7MKT12-033	299.154	174222	0.711156	17.4296	1.4638	0.634863	1.55242	0.0802537	0.517008	0.333034	497.637	2.47602	499.121	6.12128	505.933	32.2245	497.637	2.47602	98.3603
7MKT12-099	224.025	20610.4	0.929288	17.523	2.07802	0.631636	2.48987	0.0802741	1.3716	0.550873	497.759	6.57035	497.115	9.78732	494.143	45.8312	497.759	6.57035	100.732
7MKT12-053	210.522	79679.3	0.681053	17.7249	1.82812	0.624985	1.9664	0.0803439	0.724363	0.36837	498.175	3.47268	492.967	7.67945	468.839	40.4967	498.175	3.47268	106.257
7MKT12-060	176.342	65045.1	0.908886	17.5697	1.30214	0.630613	1.86057	0.0803573	1.32897	0.714279	498.255	6.37221	496.478	7.30626	488.312	28.7257	498.255	6.37221	102.036
7MKT12-092	219.443	69860	0.769263	17.5266	2.02783	0.632173	2.24641	0.0803585	0.966562	0.43027	498.263	4.6346	497.449	8.83486	493.696	44.7187	498.263	4.6346	100.925
7MKT12-093	279.594	98241.8	0.770347	17.5457	1.48369	0.631676	1.78746	0.0803828	0.99684	0.557684	498.407	4.78111	497.14	7.02642	491.284	32.7113	498.407	4.78111	101.45
7MKT12-031	240.35	146833	0.713825	17.5432	1.91827	0.63179	2.14024	0.0803861	0.94914	0.443473	498.427	4.55251	497.21	8.41417	491.591	42.318	498.427	4.55251	101.391
7MKT12-043	338.299	106628	0.693822	17.5184	1.28793	0.632705	1.39717	0.0803885	0.541592	0.387634	498.441	2.59779	497.78	5.49766	494.73	28.37	498.441	2.59779	100.75
7MKT12-052	153.45	98577.7	0.711675	17.4209	2.46092	0.636286	2.61716	0.0803935	0.890747	0.340348	498.471	4.27279	500.004	10.334	507.006	54.1469	498.471	4.27279	98.3166
7MKT12-078	18.1792	12515.8	0.751853	16.8935	15.9241	0.65675	16.9011	0.0804669	5.66302	0.335068	498.909	27.1878	512.624	68.1301	574.266	348.279	498.909	27.1878	86.8778
7MKT12-074	264.438	523506	0.671283	17.3657	1.3335	0.6389	1.64373	0.0804681	0.961062	0.584683	498.916	4.61404	501.625	6.5065	514.004	29.2904	498.916	4.61404	97.0647
7MKT12-059	273.813	118439	0.659866	17.2753	1.3564	0.6423	1.51271	0.0804752	0.669674	0.442699	498.958	3.21535	503.729	6.00725	525.437	29.73	498.958	3.21535	94.9606
7MKT12-071	102.965	35933.3	1.02522	17.4219	4.05397	0.637013	4.22311	0.0804902	1.18319	0.280171	499.048	5.68193	500.455	16.6877	506.908	89.2178	499.048	5.68193	98.4495
7MKT12-067	236.464	103822	0.649207	17.4165	1.90335	0.637371	1.98838	0.0805106	0.575269	0.289315	499.169	2.7632	500.677	7.8593	507.555	41.8559	499.169	2.7632	98.3479
7MKT12-048	230.921	217941	0.776894	17.5399	0.727594	0.632949	1.3495	0.0805182	1.13655	0.842204	499.215	5.45971	497.931	5.31131	492.056	16.0482	499.215	5.45971	101.455
7MKT12-011	357.438	255121	0.697844	17.4978	1.14151	0.634596	1.23489	0.0805342	0.471062	0.381462	499.31	2.26328	498.955	4.86797	497.328	25.1279	499.31	2.26328	100.399
7MKT12-046	14.0728	11695.2	0.46912	16.9518	18.9693	0.655066	19.9071	0.0805377	6.03812	0.303315	499.331	29.0123	511.592	80.1694	566.781	416.413	499.331	29.0123	88.0995
7MKT12-004	278.603	142825	0.734541	17.652	1.4069	0.629082	1.58981	0.0805379	0.740348	0.465684	499.332	3.55725	495.524	6.23369	477.946	31.0999	499.332	3.55725	104.475
7MKT12-065	251.465	65537.9	0.857529	17.4538	1.18224	0.636434	1.73349	0.0805642	1.26779	0.73135	499.489	6.09334	500.096	6.84561	502.871	26.0379	499.489	6.09334	99.3276
7MKT12-010	34.3123	15098.1	1.07503	16.7421	6.12362	0.664157	6.3915	0.0806452	1.83099	0.286473	499.973	8.80847	517.154	25.9062	593.819	132.831	499.973	8.80847	84.1961
7MKT12-036	270.135	73216	0.743542	17.4317	2.26058	0.637908	2.93599	0.0806487	1.87345	0.638099	499.994	9.0131	501.01	11.6111	505.636	49.7477	499.994	9.0131	98.884
7MKT12-084	126.887	57232.7	1.4591	16.9758	2.33608	0.6553	2.47978	0.0806807	0.831894	0.335471	500.185	4.00367	511.735	9.96828	563.65	50.8882	500.185	4.00367	88.7403
7MKT12-039	198.111	58159.5	0.722948	17.3487	1.55411	0.641617	2.01424	0.0807311	1.28137	0.636156	500.485	6.17046	503.307	7.99383	516.134	34.1259	500.485	6.17046	96.9682
7MKT12-073	60.5899	33446.1	0.791577	17.2207	5.63496	0.646392	6.08241	0.0807321	2.28975	0.376454	500.491	11.0264	506.256	24.2522	532.411	123.493	500.491	11.0264	94.0046
7MKT12-098	178.745	60603.7	0.718223	17.4042	3.28449	0.639687	3.42454	0.080746	0.969311	0.283049	500.574	4.66852	502.113	13.5664	509.128	72.234	500.574	4.66852	98.32
7MKT12-064	218.41	113781	0.750351	17.3277	2.26346	0.642849	2.85152	0.0807883	1.73433	0.608213	500.826	8.35717	504.068	11.3302	518.788	49.7055	500.826	8.35717	96.5377
7MKT12-003	250.677	148565	0.82037	17.4638	1.96897	0.637846	3.03076	0.0807893	2.30405	0.760222	500.833	11.1026	500.972	11.9852	501.602	43.3445	500.833	11.1026	99.8466
7MKT12-009	189.503	212515	0.818465	17.6386	2.09468	0.631606	2.22846	0.0807998	0.760485	0.341261	500.895	3.665	497.096	8.75944	479.618	46.3143	500.895	3.665	104.436
7MKT12-090	111.049	36457	0.913104	17.6231	3.60015	0.632465	3.895	0.0808383	1.48657	0.381661	501.125	7.16737	497.631	15.3237	481.568	79.5541	501.125	7.16737	104.061
7MKT12-097	190.843	71392	0.724717	17.4	1.91798	0.64062	2.23448	0.0808442	1.14641	0.513054	501.16	5.52768	502.69	8.8595	509.639	42.1519	501.16	5.52768	98.3362
7MKT12-081	205.675	66489.2	1.08036	17.5786	1.50038	0.634181	1.64075	0.080853	0.664015	0.404702	501.212	3.20203	498.697	6.46535	487.177	33.0931	501.212	3.20203	102.881
7MKT12-068	305.305	154495	0.376186	17.5103	1.21022	0.636887	1.41373	0.0808825	0.730754	0.516898	501.388	3.52505	500.377	5.58528	495.757	26.6635	501.388	3.52505	101.136
7MKT12-061	293.249	171308	0.660699	17.5775	1.20198	0.634459	1.53559	0.0808835	0.955663	0.622342	501.394	4.61003	498.87	6.05258	487.304	26.5351	501.394	4.61003	102.892
7MKT12-012	228.29	217258	0.703416	17.0937	4.08063	0.652794	4.77923	0.0809305	2.48788	0.52056	501.674	12.0078	510.197	19.1689	548.596	89.1726	501.674	12.0078	91.447
7MKT12-080	201.457	100975	0.759498	17.3139	1.56591	0.644818	1.99951	0.0809711	1.24336	0.621834	501.917	6.00388	505.285	7.95942	520.54	34.3644	501.917	6.00388	96.4223
7MKT12-051	338.013	158466	0.585601	17.4888	1.31348	0.638576	1.75721	0.0809974	1.16729	0.664288	502.073	5.63826	501.424	6.95355	498.44	28.9384	502.073	5.63826	100.729
7MKT12-077	224.415	153395	0.639107	17.5269	1.51877	0.637196	1.64082	0.0809984	0.62098	0.378457	502.079	2.99949	500.568	6.48438	493.67	33.496	502.079	2.99949	101.703
7MKT12-014	115.212	39317	0.627916	17.6633	4.32107	0.632312	4.56895	0.0810032	1.48449	0.324908	502.108	7.17084	497.535	17.973	476.527	95.5999	502.108	7.17084	105.368
7MKT12-100	196.764	47369.8	0.879251	17.5267	2.51324	0.637332	2.62585	0.0810149	0.76071	0.289701	502.178	3.67511	500.653	10.3787	493.683	55.4212	502.178	3.67511	101.721
7MKT12-056	169.548	7268.48	1.16361	17.236	4.72909	0.648316	4.93136	0.0810441	1.39786	0.283463	502.352	6.75553	507.442	19.6969	530.47	103.673	502.352	6.75553	94.6993
7MKT12-055	278.682	88571.8	0.700109	17.33	1.57816	0.645463	1.67975	0.0811277	0.575287	0.342484	502.85	2.78288	505.683	6.69058	518.495	34.6256	502.85	2.78288	96.9827
7MKT12-024	400.169	60224.4	0.513527	17.4129	1.5286	0.64244	1.8053	0.0811339	0.960456	0.53202	502.887	4.64642	503.816	7.17017	508.054	33.596	502.887	4.64642	98.983
7MKT12-044	33.537	20431.3	1.02969	16.3437	8.61073	0.684565	8.88019	0.0811452	2.17093	0.244469	502.955	10.5037	529.53	36.6579	645.792	185.323	502.955	10.5037	77.8818
7MKT12-088	211.039	92275.3	0.926466	17.4183	1.51353	0.642341	2.1242	0.0811463	1.49045	0.701655	502.962	7.21143	503.754	8.43601	507.335	33.2892	502.962	7.21143	99.1379
7MKT12-063	323.194	135045	0.623634	17.582	0.961571	0.636815	1.59283	0.0812046	1.26984	0.797222	503.309	6.1481	500.332	6.29245	486.756	21.229	503.309	6.1481	103.401
7MKT12-089	159.756	143468	0.916841	17.3187	2.7271	0.647496	2.96767	0.0813299	1.17046	0.394405	504.056	5.67502	506.937	11.8434	519.934	59.8805	504.056	5.67502	96.9461
7MKT12-091	194.451	23404.7	0.915938	16.875	2.48258	0.664531	5.18276	0.0813313	4.54948	0.877811	504.064	22.0588	517.382	21.0124	576.614	53.9895	504.064	22.0588	87.418
7MKT12-030	127.537	67634.7	0.863687	17.3459	4.27936	0.646566	4.34815	0.0813409	0.770431	0.177186	504.121	3.73593	506.363	17.3385	516.48	94.0085	504.121	3.73593	97.6072
7MKT12-050	223.558	137186	0.792468	17.2988	1.68556	0.648383	1.91851	0.0813477	0.916289	0.477604	504.162	4.44356	507.483	7.6626	522.455	36.9835	504.162	4.44356	96.4987
7MKT12-005	327.815	101449	0.599916	17.5181	1.30188	0.64122	1.47583	0.0814691	0.695113	0.470998	504.886	3.37561	503.061	5.85479	494.749	28.681	504.886	3.37561	102.049
7MKT12-007	51.6544	9986.23	0.492518	17.4965	11.0976	0.642853	11.1853	0.0815761	1.39765	0.124954	505.523	6.79552	504.071	44.4701	497.505	245.154	505.523	6.79552	101.612
7MKT12-040	427.98	92263.7	0.763275	17.5338	1.18614	0.641596	1.3838	0.0815898	0.712724	0.51505	505.605	3.46587	503.294	5.49163	492.8	26.1533	505.605	3.46587	102.598
7MKT12-001	64.0197	17023.9	1.41184	17.2381	6.20329	0.653219	6.39689	0.0816672	1.56186	0.24416	506.067	7.60178	510.458	25.6696	530.195	136.025	506.067	7.60178	95.4491
7MKT12-054	54.418	20366.2	0.57697	17.0961	5.36152	0.660653	5.50073	0.0819159	1.22969	0.22355	507.548	6.00188	515.013	22.2236	548.3	117.183	507.548	6.00188	92.5677
7MKT12-028	12.8328	6521.68	0.4944	21.214	54.5448	0.537032	55.2797	0.0826271	8.98393	0.162518	511.784	44.2013	436.466	198.611	56.2548	1399.82	511.784	44.2013	909.762
Table 08-MKT-12. U-Pb geochronologic analyses.
							Isotope ratios						Apparent ages (Ma)
Analysis	U	206Pb	U/Th	206Pb*	±	207Pb*	±	206Pb*	±	error	206Pb*	±	207Pb*	±	206Pb*	±	Best age	±	Conc
	(ppm)	204Pb		207Pb*	(%)	235U*	(%)	238U	(%)	corr.	238U*	(Ma)	235U	(Ma)	207Pb*	(Ma)	(Ma)	(Ma)	(%)
8MKT12-061	57.7938	2474.63	0.791802	17.4635	8.14065	0.52788	8.77669	0.0668597	3.28027	0.373748	417.209	13.2521	430.401	30.7992	501.652	179.479	417.209	13.2521	83.167
8MKT12-020	88.8476	4940.26	0.751335	17.0341	6.54454	0.623674	6.65485	0.0770507	1.20664	0.181318	478.495	5.56464	492.148	25.961	556.218	142.902	478.495	5.56464	86.0264
8MKT12-092	64.8222	12187.8	0.982314	16.3479	14.4258	0.656928	14.7501	0.0778894	3.07609	0.208547	483.513	14.3292	512.733	59.4476	645.234	311.479	483.513	14.3292	74.936
8MKT12-029	30.4943	9036.23	0.420514	15.53	13.4682	0.694288	13.9636	0.0782004	3.68649	0.264008	485.372	17.2362	535.373	58.164	754.499	285.466	485.372	17.2362	64.3304
8MKT12-026	82.7036	23207.9	0.841759	17.2377	6.81733	0.630258	7.10967	0.0787946	2.01779	0.283809	488.924	9.5006	496.257	27.9158	530.25	149.508	488.924	9.5006	92.2063
8MKT12-014	58.4939	28994.5	1.05692	17.4697	6.07629	0.621892	6.70837	0.0787951	2.8427	0.423754	488.927	13.3847	491.033	26.1237	500.888	133.918	488.927	13.3847	97.6121
8MKT12-025	105.629	36151.7	0.952229	17.8424	1.58854	0.609563	1.77533	0.0788808	0.792671	0.446492	489.439	3.73602	483.284	6.82693	454.219	35.2822	489.439	3.73602	107.754
8MKT12-010	34.7752	7802.27	1.30186	17.128	6.59455	0.635788	6.95378	0.0789801	2.20612	0.317255	490.032	10.41	499.695	27.45	544.204	144.288	490.032	10.41	90.0456
8MKT12-083	241.555	90231.2	1.37687	17.4071	2.02709	0.626447	2.59963	0.079088	1.62757	0.626076	490.677	7.68972	493.88	10.1672	508.769	44.5885	490.677	7.68972	96.4439
8MKT12-067	91.5594	119192	0.628355	17.2335	5.77307	0.634422	5.96098	0.0792958	1.48488	0.2491	491.918	7.03266	498.847	23.4984	530.786	126.569	491.918	7.03266	92.6773
8MKT12-096	44.0814	14674.6	0.479537	17.659	11.9948	0.619251	12.1965	0.0793106	2.20927	0.18114	492.007	10.4653	489.378	47.3952	477.07	266.013	492.007	10.4653	103.131
8MKT12-048	89.2783	45150.7	1.03707	17.2058	3.26467	0.63559	3.92643	0.079314	2.18147	0.555586	492.027	10.334	499.572	15.494	534.283	71.4676	492.027	10.334	92.0911
8MKT12-024	191.727	269387	0.925903	17.6282	2.4914	0.620634	2.55963	0.0793492	0.587022	0.229339	492.237	2.78198	490.244	9.95339	480.922	55.0568	492.237	2.78198	102.353
8MKT12-002	33.8147	8937.73	2.22497	16.2444	14.905	0.673509	15.095	0.07935	2.38731	0.158152	492.242	11.3139	522.844	61.7609	658.863	321.173	492.242	11.3139	74.7108
8MKT12-073	135.557	73203	1.04406	17.2151	2.40344	0.636942	2.50104	0.0795258	0.691874	0.276634	493.292	3.28564	500.411	9.88169	533.103	52.6556	493.292	3.28564	92.5322
8MKT12-007	87.1211	49418.5	0.695522	17.5682	4.8481	0.624363	5.03741	0.0795542	1.36799	0.271566	493.461	6.49859	492.579	19.6628	488.477	107.049	493.461	6.49859	101.02
8MKT12-008	55.2094	21028.7	0.815946	17.7883	8.76923	0.617031	8.93728	0.0796051	1.72499	0.193011	493.765	8.19939	487.985	34.6412	460.915	194.752	493.765	8.19939	107.127
8MKT12-021	102.89	63508.4	1.04738	17.2447	3.88489	0.636823	4.47517	0.0796479	2.22144	0.496393	494.021	10.5644	500.337	17.6807	529.356	85.1504	494.021	10.5644	93.3249
8MKT12-046	13.2028	6002.52	0.697698	22.3898	29.8	0.490851	30.2187	0.0797074	5.01323	0.165898	494.376	23.8578	405.49	101.359	-73.9656	742.676	494.376	23.8578	NA
8MKT12-082	131.778	57425.6	1.14055	17.3725	3.54096	0.63288	3.73145	0.0797412	1.17698	0.315423	494.578	5.6034	497.888	14.686	513.135	77.8256	494.578	5.6034	96.3836
8MKT12-043	77.5269	16443.2	0.993259	18.1317	6.57484	0.606584	6.67727	0.0797679	1.16509	0.174486	494.737	5.54851	481.403	25.604	418.371	147.004	494.737	5.54851	118.253
8MKT12-057	96.8195	42333.8	0.0318109	17.5275	3.02639	0.627568	3.10684	0.0797773	0.702403	0.226083	494.793	3.34541	494.58	12.1644	493.612	66.7453	494.793	3.34541	100.239
8MKT12-013	198.418	93702.2	0.87732	17.596	1.86819	0.625231	2.20935	0.079791	1.17944	0.533841	494.875	5.61835	493.121	8.63038	485.002	41.2695	494.875	5.61835	102.036
8MKT12-037	51.4932	9913.5	1.72438	18.1363	9.24492	0.606698	9.41444	0.0798032	1.77851	0.188913	494.948	8.47325	481.475	36.1115	417.801	206.903	494.948	8.47325	118.465
8MKT12-028	125.594	35454.3	1.39358	17.6356	3.0389	0.624891	3.19903	0.0799268	0.999447	0.312422	495.686	4.76844	492.908	12.4925	480.002	67.1639	495.686	4.76844	103.267
8MKT12-071	94.0566	15326.3	1.51158	18.041	4.70454	0.610963	4.85786	0.0799421	1.2108	0.249246	495.777	5.77786	484.167	18.7091	429.553	104.902	495.777	5.77786	115.417
8MKT12-063	85.2347	51763.1	1.06704	17.5318	4.50817	0.628952	4.65285	0.0799731	1.15128	0.247435	495.962	5.49579	495.443	18.2434	493.044	99.4597	495.962	5.49579	100.592
8MKT12-084	130.575	96022.8	1.73546	17.2697	1.99967	0.638734	2.13244	0.0800026	0.740685	0.347342	496.138	3.53697	501.522	8.4397	526.181	43.8319	496.138	3.53697	94.2904
8MKT12-053	103.606	80923.8	0.299528	17.6184	4.87847	0.626537	5.04904	0.0800591	1.30127	0.257726	496.476	6.21797	493.936	19.7504	482.203	107.828	496.476	6.21797	102.96
8MKT12-035	211.24	82645.4	0.873832	17.2241	1.61028	0.641811	2.23916	0.0801755	1.55589	0.694858	497.17	7.44468	503.427	8.88811	531.983	35.269	497.17	7.44468	93.4561
8MKT12-052	74.3267	36925.1	0.699213	17.2952	3.31634	0.639895	3.65474	0.0802664	1.5359	0.42025	497.713	7.35673	502.241	14.4813	522.906	72.7798	497.713	7.35673	95.1822
8MKT12-056	26.0482	2315.59	0.210105	15.4376	15.9314	0.716905	16.4096	0.0802678	3.93263	0.239654	497.721	18.837	548.838	69.6824	767.073	337.581	497.721	18.837	64.8858
8MKT12-038	58.9369	19471.2	0.723037	17.089	6.41618	0.647861	6.59533	0.0802967	1.52679	0.231495	497.893	7.31562	507.161	26.3345	549.197	140.249	497.893	7.31562	90.6584
8MKT12-077	22.5868	11857	0.628275	21.7674	25.3629	0.508661	25.906	0.0803033	5.27651	0.203679	497.933	25.2845	417.548	88.9149	-5.49325	620.518	497.933	25.2845	NA
8MKT12-047	88.6701	31315.9	1.60783	17.7092	4.8875	0.625251	5.06471	0.0803066	1.32802	0.26221	497.952	6.36394	493.133	19.7867	470.835	108.233	497.952	6.36394	105.759
8MKT12-066	56.27	18147.1	0.929371	18.0624	8.015	0.613268	8.15468	0.0803389	1.50283	0.184291	498.145	7.20435	485.619	31.4862	426.91	178.975	498.145	7.20435	116.686
8MKT12-049	33.2649	7651.73	1.70459	16.5971	9.90562	0.668307	10.2945	0.0804464	2.80286	0.272267	498.787	13.4531	519.682	41.897	612.599	214.51	498.787	13.4531	81.4214
8MKT12-022	163.891	25269.9	1.30554	17.2776	3.46477	0.642288	3.61673	0.0804847	1.03736	0.286822	499.015	4.98128	503.722	14.3633	525.136	75.9906	499.015	4.98128	95.0259
8MKT12-086	150.814	59376.9	0.872374	17.5662	2.05066	0.632597	2.70583	0.0805944	1.7653	0.652408	499.67	8.4875	497.713	10.6462	488.718	45.2628	499.67	8.4875	102.241
8MKT12-006	380.464	81201.8	1.18536	17.4508	1.19668	0.637793	1.44404	0.0807223	0.808212	0.559688	500.433	3.89156	500.939	5.70999	503.246	26.3438	500.433	3.89156	99.441
8MKT12-050	95.8454	84019.2	1.83983	17.5181	5.22609	0.635516	5.52288	0.0807442	1.78611	0.323402	500.563	8.6023	499.526	21.7939	494.758	115.257	500.563	8.6023	101.173
8MKT12-041	400.893	212229	1.20513	17.4744	1.32391	0.637693	1.70628	0.0808187	1.07641	0.630852	501.008	5.18867	500.877	6.74631	500.299	29.1701	501.008	5.18867	100.142
8MKT12-093	47.8624	26349.9	1.83243	17.4108	10.0683	0.640629	10.1977	0.0808952	1.61903	0.158765	501.464	7.81112	502.695	40.4536	508.327	221.903	501.464	7.81112	98.6499
8MKT12-034	202.066	140421	1.43743	17.4589	2.34472	0.640275	2.46963	0.0810743	0.775471	0.314003	502.532	3.74896	502.476	9.78869	502.218	51.6248	502.532	3.74896	100.062
8MKT12-030	14.479	9529.49	0.599409	55.5578	106.145	0.201617	106.222	0.0812403	4.04101	0.0380431	503.522	19.5731	186.494	182.923	NA	NA	503.522	19.5731	NA
8MKT12-027	99.6069	31469.9	1.14331	17.9745	4.34228	0.626216	4.46617	0.0816355	1.04466	0.233906	505.878	5.08268	493.736	17.4644	437.787	96.6859	505.878	5.08268	115.553
8MKT12-039	64.3888	33303.6	0.80691	16.923	5.36196	0.672213	5.764	0.0825054	2.11499	0.36693	511.06	10.3915	522.057	23.5314	570.476	116.765	511.06	10.3915	89.5849
8MKT12-004	50.6721	19003.5	1.90655	18.7999	10.2154	0.610755	12.2597	0.0832764	6.77833	0.552897	515.65	33.5914	484.036	47.2345	336.989	231.954	515.65	33.5914	153.017
8MKT12-075	189.171	144578	2.43026	11.0381	0.644003	3.14986	0.961806	0.252165	0.714375	0.742743	1449.63	9.27401	1444.97	7.41281	1438.09	12.2784	1438.09	12.2784	100.802
8MKT12-016	87.3046	81858.7	1.37566	11.0275	0.85081	3.09814	1.15608	0.247786	0.782715	0.677043	1427.05	10.0198	1432.23	8.87448	1439.92	16.2175	1439.92	16.2175	99.1061
8MKT12-065	56.7759	16047.6	1.14828	10.076	1.59397	3.36189	2.03079	0.245681	1.25832	0.619621	1416.16	15.9983	1495.56	15.8942	1609.97	29.7063	1609.97	29.7063	87.9622
8MKT12-019	94.4453	237095	1.5663	9.8949	0.799935	4.08153	1.65408	0.292909	1.44779	0.875282	1656.05	21.1441	1650.62	13.4909	1643.69	14.8435	1643.69	14.8435	100.752
8MKT12-081	85.8221	169936	1.52679	9.69555	1.44068	4.23072	2.37189	0.297499	1.88423	0.794399	1678.9	27.8505	1680	19.4819	1681.36	26.6024	1681.36	26.6024	99.8531
8MKT12-089	76.52	25846.2	0.763753	9.67289	0.952913	4.17019	5.6006	0.292557	5.51893	0.985419	1654.29	80.5298	1668.18	45.8996	1685.69	17.5861	1685.69	17.5861	98.1378
8MKT12-085	105.546	228068	3.09879	9.63261	0.899796	4.34746	1.08888	0.303723	0.613205	0.563153	1709.74	9.20908	1702.41	8.98893	1693.38	16.5895	1693.38	16.5895	100.966
8MKT12-100	72.7955	163769	1.54413	9.59563	0.922862	4.38562	1.24564	0.305213	0.836622	0.671642	1717.11	12.6116	1709.63	10.2999	1700.47	16.9996	1700.47	16.9996	100.978
8MKT12-070	69.7221	101554	1.69403	9.57462	0.745758	4.40559	1.06246	0.305932	0.756748	0.712259	1720.66	11.4281	1713.39	8.79254	1704.51	13.7298	1704.51	13.7298	100.947
8MKT12-055	51.0611	112349	1.52067	9.567	1.47873	4.36062	1.69658	0.302568	0.831707	0.490225	1704.03	12.4541	1704.91	14.0141	1705.97	27.2221	1705.97	27.2221	99.8862
8MKT12-098	79.8068	186835	1.06626	9.55565	0.734998	4.42707	0.949204	0.306814	0.600639	0.632781	1725.01	9.09061	1717.42	7.86229	1708.16	13.5255	1708.16	13.5255	100.987
8MKT12-078	173.219	283095	1.13992	9.54929	0.329716	4.37318	1.33674	0.302878	1.29544	0.969103	1705.56	19.4133	1707.29	11.0474	1709.38	6.06726	1709.38	6.06726	99.7765
8MKT12-054	96.6147	218031	1.53932	9.54229	0.7844	4.47284	2.02585	0.309553	1.86783	0.921998	1738.51	28.4623	1725.95	16.8131	1710.73	14.43	1710.73	14.43	101.624
8MKT12-058	197.591	59599.8	2.37151	9.53772	0.526941	4.23454	0.797447	0.29292	0.598545	0.750576	1656.1	8.74163	1680.74	6.55037	1711.61	9.69204	1711.61	9.69204	96.7569
8MKT12-079	117.937	199313	2.01015	9.53525	0.78302	4.44442	1.33308	0.307359	1.07888	0.809314	1727.7	16.351	1720.66	11.0501	1712.09	14.4022	1712.09	14.4022	100.912
8MKT12-064	167.766	15890.8	1.00082	9.53314	0.322293	3.98853	2.09407	0.27577	2.06912	0.988085	1570.03	28.8325	1631.86	17.0021	1712.5	5.92833	1712.5	5.92833	91.6806
8MKT12-094	139.341	188955	4.0889	9.52784	0.437159	4.42599	0.564103	0.305846	0.356516	0.632006	1720.24	5.38281	1717.22	4.67221	1713.52	8.04018	1713.52	8.04018	100.392
8MKT12-009	185.932	277365	1.40965	9.52752	0.317287	4.44639	0.90009	0.307246	0.842313	0.93581	1727.14	12.7621	1721.03	7.46144	1713.58	5.83545	1713.58	5.83545	100.791
8MKT12-076	223.573	269476	1.75309	9.52295	0.241723	4.44656	0.780846	0.30711	0.74249	0.950878	1726.47	11.2458	1721.06	6.47296	1714.46	4.4452	1714.46	4.4452	100.7
8MKT12-018	81.1392	146192	1.50022	9.52271	1.11183	4.41813	1.54528	0.305139	1.07319	0.694494	1716.74	16.1747	1715.74	12.7953	1714.51	20.4448	1714.51	20.4448	100.13
8MKT12-040	84.9987	123062	1.89602	9.51767	0.647678	4.45852	1.84863	0.307766	1.73146	0.936617	1729.7	26.2678	1723.29	15.3331	1715.48	11.9091	1715.48	11.9091	100.829
8MKT12-011	185.738	193627	2.91397	9.51387	0.300133	4.50362	0.634736	0.310755	0.559294	0.881145	1744.42	8.54782	1731.64	5.274	1716.22	5.51812	1716.22	5.51812	101.643
8MKT12-091	149.143	292458	2.2567	9.5134	0.431112	4.44457	1.60003	0.306665	1.54085	0.963017	1724.28	23.3121	1720.69	13.2632	1716.31	7.92618	1716.31	7.92618	100.464
8MKT12-069	183.794	301032	1.66687	9.512	0.491354	4.45626	0.765024	0.307426	0.586373	0.766476	1728.03	8.88824	1722.86	6.34433	1716.58	9.03345	1716.58	9.03345	100.667
8MKT12-003	121.056	259139	3.23839	9.50352	0.655139	4.53857	1.54776	0.312826	1.40227	0.905998	1754.6	21.54	1738.07	12.8789	1718.22	12.0422	1718.22	12.0422	102.117
8MKT12-044	114.556	207267	2.00013	9.49817	0.731721	4.55362	1.25121	0.313686	1.01495	0.81117	1758.82	15.6231	1740.82	10.4173	1719.25	13.4481	1719.25	13.4481	102.301
8MKT12-099	39.2443	38992.9	1.0368	9.49775	1.81108	4.201	2.13963	0.289382	1.13931	0.532478	1638.44	16.4835	1674.22	17.5501	1719.33	33.2838	1719.33	33.2838	95.2952
8MKT12-088	286.818	971200	8.91599	9.48702	0.342091	4.50277	1.18818	0.309819	1.13787	0.957657	1739.82	17.3503	1731.48	9.87241	1721.41	6.28543	1721.41	6.28543	101.069
8MKT12-068	252.844	15667.2	1.97093	9.4398	0.314057	4.36364	2.89234	0.298752	2.87524	0.994087	1685.12	42.6366	1705.48	23.8973	1730.58	5.76369	1730.58	5.76369	97.3732
8MKT12-015	334.414	13805.7	1.41174	9.4383	0.869353	4.35326	3.30822	0.297994	3.19195	0.964854	1681.35	47.2407	1703.51	27.3228	1730.87	15.9526	1730.87	15.9526	97.1394
8MKT12-097	46.8643	50686.3	1.77369	9.42993	1.62022	4.5621	1.86941	0.312013	0.932524	0.498833	1750.6	14.296	1742.37	15.5702	1732.49	29.7262	1732.49	29.7262	101.045
8MKT12-087	186.596	372899	5.481	9.41151	0.296329	4.66387	1.4368	0.31835	1.40591	0.978501	1781.66	21.8853	1760.78	12.0138	1736.08	5.43458	1736.08	5.43458	102.626
8MKT12-036	154.265	262101	1.89112	9.38999	0.613727	4.61409	1.437	0.314232	1.29935	0.90421	1761.5	20.0274	1751.82	11.9926	1740.28	11.248	1740.28	11.248	101.219
8MKT12-095	93.7851	172876	1.29017	9.38854	0.66997	4.56483	1.07711	0.310829	0.843383	0.783009	1744.78	12.892	1742.87	8.97164	1740.56	12.2786	1740.56	12.2786	100.242
8MKT12-059	195.857	281727	3.08642	9.3851	0.503544	4.56447	0.838387	0.31069	0.670326	0.799542	1744.1	10.2431	1742.8	6.98309	1741.23	9.2272	1741.23	9.2272	100.165
8MKT12-042	70.0118	101547	1.40641	9.37337	0.919558	4.63811	1.12289	0.315308	0.64444	0.57391	1766.78	9.95884	1756.15	9.37969	1743.52	16.8474	1743.52	16.8474	101.334
8MKT12-033	154.208	205934	2.42052	9.34588	0.560565	4.62258	0.793591	0.313331	0.561743	0.707849	1757.08	8.63944	1753.35	6.62494	1748.9	10.2625	1748.9	10.2625	100.468
8MKT12-032	214.039	202280	2.24823	9.3269	0.222678	4.61542	0.718626	0.31221	0.683256	0.95078	1751.57	10.4796	1752.06	5.99746	1752.62	4.07546	1752.62	4.07546	99.9402
8MKT12-012	136.92	130840	1.14023	9.2125	0.296671	4.75576	1.55987	0.317757	1.5314	0.981747	1778.77	23.8051	1777.12	13.0876	1775.18	5.41265	1775.18	5.41265	100.202
8MKT12-051	68.2165	107826	1.18697	9.20191	0.956953	4.75752	3.49842	0.31751	3.365	0.961861	1777.56	52.2776	1777.43	29.3608	1777.28	17.4592	1777.28	17.4592	100.016
8MKT12-001	102.556	186181	2.19251	9.18366	0.367129	4.87127	0.556262	0.324457	0.417904	0.751272	1811.46	6.59954	1797.3	4.68622	1780.89	6.69387	1780.89	6.69387	101.716
8MKT12-031	161.341	215547	1.71972	9.17109	0.464568	4.78369	0.790316	0.318188	0.639356	0.808987	1780.87	9.94872	1782.04	6.63735	1783.39	8.46838	1783.39	8.46838	99.8587
8MKT12-080	224.223	508789	0.858907	7.5451	0.183327	7.08009	2.579	0.387438	2.57247	0.99747	2110.94	46.309	2121.54	22.9497	2131.83	3.20853	2131.83	3.20853	99.0201
8MKT12-045	80.7595	123229	2.12896	6.22999	0.304375	10.4285	2.3546	0.471203	2.33484	0.99161	2488.83	48.2081	2473.58	21.8196	2461.07	5.14419	2461.07	5.14419	101.128
8MKT12-072	343.305	637980	5.25694	5.75459	0.353015	11.6395	0.947683	0.485787	0.879479	0.928031	2552.42	18.5368	2575.85	8.86152	2594.32	5.8852	2594.32	5.8852	98.385
8MKT12-062	229.413	29603.2	1.22919	4.50678	0.224304	16.1011	2.15442	0.526283	2.14271	0.994565	2725.77	47.6292	2882.82	20.5992	2994.43	3.60808	2994.43	3.60808	91.0282
Table 09-MKT-12. U-Pb geochronologic analyses.
							Isotope ratios						Apparent ages (Ma)
Analysis	U	206Pb	U/Th	206Pb*	±	207Pb*	±	206Pb*	±	error	206Pb*	±	207Pb*	±	206Pb*	±	Best age	±	Conc
	(ppm)	204Pb		207Pb*	(%)	235U*	(%)	238U	(%)	corr.	238U*	(Ma)	235U	(Ma)	207Pb*	(Ma)	(Ma)	(Ma)	(%)
9MKT12-13	54.1032	3609.7	0.766393	15.9177	13.8743	0.665814	15.1442	0.0768659	6.0703	0.400834	477.388	27.9321	518.164	61.5365	702.264	296.659	477.388	27.9321	67.9784
9MKT12-54	43.7193	25381.5	1.55928	15.7286	6.99216	0.68436	7.08583	0.0780683	1.14832	0.162059	484.582	5.36055	529.406	29.2409	727.611	148.4	484.582	5.36055	66.5991
9MKT12-05	41.8278	19112.3	1.69687	17.751	7.26334	0.607577	7.48468	0.0782209	1.80674	0.241392	485.495	8.44948	482.031	28.7309	465.596	161.106	485.495	8.44948	104.274
9MKT12-26	40.3593	11547.8	1.34658	17.391	14.6708	0.620232	14.7429	0.0782307	1.45629	0.0987795	485.553	6.81134	489.993	57.3655	510.791	324.052	485.553	6.81134	95.0591
9MKT12-97	61.9312	65006.5	1.77383	17.5499	6.26735	0.614948	6.39228	0.0782728	1.25758	0.196735	485.805	5.88488	486.676	24.7201	490.784	138.362	485.805	5.88488	98.9855
9MKT12-47	105.515	27846.9	1.00675	17.6165	3.79044	0.612885	4.3696	0.0783065	2.17393	0.497512	486.007	10.177	485.378	16.8612	482.434	83.7696	486.007	10.177	100.741
9MKT12-19	66.1422	5120.83	1.00443	17.1742	5.74223	0.633141	6.23758	0.0788636	2.436	0.390537	489.336	11.4791	498.051	24.5588	538.319	125.733	489.336	11.4791	90.9007
9MKT12-91	26.3862	7594.12	0.834053	17.1469	16.9799	0.634214	18.0573	0.0788714	6.14404	0.340252	489.383	28.9551	498.718	71.2727	541.778	373.701	489.383	28.9551	90.329
9MKT12-52	19.4339	8909.23	0.816202	21.9806	31.3797	0.494801	31.6469	0.0788804	4.10405	0.129683	489.437	19.3432	408.177	106.759	-29.0681	777.132	489.437	19.3432	NA
9MKT12-69	48.7999	17768.1	1.25884	17.6781	7.28527	0.615692	7.55275	0.0789403	1.99219	0.263771	489.795	9.39619	487.144	29.2321	474.694	161.341	489.795	9.39619	103.181
9MKT12-66	46.4909	17225	2.03327	16.7247	8.66931	0.651313	8.81527	0.0790034	1.59747	0.181217	490.172	7.54006	509.287	35.3184	596.036	188.143	490.172	7.54006	82.2387
9MKT12-07	27.8999	12741.4	1.15774	17.0665	12.1513	0.638375	12.6904	0.0790168	3.65972	0.288384	490.251	17.2766	501.299	50.2484	552.032	266.111	490.251	17.2766	88.8086
9MKT12-92	185.583	46242.5	1.68969	17.8109	1.60532	0.612398	2.56798	0.0791074	2.00437	0.780522	490.793	9.47214	485.071	9.90368	458.122	35.6224	490.793	9.47214	107.131
9MKT12-85	67.523	15324.5	0.786479	17.8667	5.17683	0.61089	6.0468	0.07916	3.12478	0.516765	491.107	14.776	484.121	23.2878	451.16	115.052	491.107	14.776	108.854
9MKT12-30	34.6061	21296.1	2.02065	17.139	16.8641	0.636873	17.0319	0.0791656	2.38445	0.139999	491.14	11.276	500.368	67.3855	542.787	371.036	491.14	11.276	90.4849
9MKT12-44	30.273	13360.9	2.04953	17.5045	11.7681	0.624116	12.0707	0.0792344	2.68611	0.222531	491.552	12.7128	492.424	47.1328	496.464	260.108	491.552	12.7128	99.0105
9MKT12-78	46.9876	22425	1.87847	19.182	12.0435	0.570089	12.3563	0.0793113	2.76244	0.223565	492.011	13.0858	458.072	45.5857	291.19	275.99	492.011	13.0858	168.966
9MKT12-71	58.7479	26690.7	1.49308	18.0643	5.59338	0.605398	6.05534	0.0793159	2.31975	0.383092	492.038	10.9893	480.654	23.1901	426.685	124.833	492.038	10.9893	115.317
9MKT12-68	39.3867	30128.7	1.77751	17.5027	6.69041	0.625662	6.77934	0.0794226	1.09448	0.161444	492.675	5.19135	493.39	26.4988	496.716	147.572	492.675	5.19135	99.1864
9MKT12-94	66.2881	35193	1.29759	17.1387	6.40127	0.639064	6.93064	0.0794367	2.65659	0.38331	492.759	12.6028	501.727	27.4446	542.814	140.085	492.759	12.6028	90.7786
9MKT12-65	46.7292	10343.5	1.21788	17.0435	9.40987	0.64385	9.52512	0.079587	1.47722	0.155087	493.657	7.02017	504.687	37.8987	554.981	205.671	493.657	7.02017	88.9503
9MKT12-15	47.3397	27395.3	2.07876	17.603	6.34213	0.623463	6.62311	0.0795971	1.90867	0.288183	493.718	9.07163	492.016	25.8318	484.121	140.163	493.718	9.07163	101.982
9MKT12-59	30.679	11526	1.81627	18.0162	14.7308	0.609329	15.3631	0.0796186	4.36205	0.28393	493.846	20.7374	483.137	59.1298	432.622	329.766	493.846	20.7374	114.152
9MKT12-22	32.5322	19643.7	1.29165	18.264	14.1969	0.601377	14.6012	0.0796602	3.41225	0.233696	494.094	16.2299	478.107	55.7324	402.108	319.423	494.094	16.2299	122.876
9MKT12-93	69.5395	25085.2	2.08098	16.4327	4.57366	0.668965	4.74188	0.0797279	1.25183	0.263993	494.499	5.95879	520.083	19.3014	634.109	98.523	494.499	5.95879	77.9832
9MKT12-10	56.7635	35361.5	0.668013	18.0825	9.4754	0.608004	9.67674	0.0797376	1.96371	0.202931	494.557	9.34849	482.301	37.1683	424.437	211.834	494.557	9.34849	116.521
9MKT12-25	64.7963	34525.6	2.16978	18.0264	7.10108	0.610258	7.32617	0.079785	1.80207	0.245977	494.839	8.5837	483.723	28.1992	431.364	158.414	494.839	8.5837	114.715
9MKT12-41	51.691	30594.4	1.57261	16.5824	3.6638	0.663497	4.44526	0.0797967	2.51733	0.566294	494.909	11.9923	516.751	18.0049	614.513	79.1427	494.909	11.9923	80.5368
9MKT12-42	92.1299	33067.6	1.27544	17.348	4.93297	0.634239	5.12209	0.0797996	1.379	0.269225	494.926	6.56961	498.733	20.187	516.223	108.387	494.926	6.56961	95.8745
9MKT12-02	63.2344	33450.8	0.971547	17.9672	7.01662	0.612747	7.2711	0.0798475	1.90681	0.262245	495.212	9.08919	485.291	28.0579	438.684	156.324	495.212	9.08919	112.886
9MKT12-14	85.1427	37697.4	1.3169	17.1538	4.9381	0.642168	5.05713	0.079893	1.09076	0.215687	495.484	5.20206	503.648	20.0827	540.895	108.063	495.484	5.20206	91.6045
9MKT12-79	34.3291	35170	1.86933	18.2499	6.4914	0.60375	7.40675	0.0799128	3.56674	0.481553	495.602	17.0145	479.61	28.3198	403.838	145.493	495.602	17.0145	122.723
9MKT12-96	24.1665	8661.5	1.39139	20.9988	25.6983	0.52503	26.0256	0.079961	4.11434	0.158088	495.89	19.6377	428.506	91.2227	80.4927	618.935	495.89	19.6377	616.068
9MKT12-62	67.0924	22393.6	0.778019	17.2214	3.15537	0.640337	3.47782	0.0799788	1.46247	0.420514	495.996	6.98177	502.515	13.786	532.329	69.0965	495.996	6.98177	93.1747
9MKT12-58	52.5735	13165.8	0.865737	17.6204	5.71348	0.625862	6.20951	0.0799822	2.43191	0.391642	496.017	11.6103	493.515	24.2753	481.946	126.301	496.017	11.6103	102.919
9MKT12-46	38.8691	28526	1.19697	18.0153	12.8882	0.612234	13.2242	0.079994	2.9617	0.223961	496.087	14.1415	484.968	51.0332	432.738	288.212	496.087	14.1415	114.639
9MKT12-17	93.1003	55818	1.25565	17.1126	4.64008	0.645021	5.14555	0.0800552	2.22403	0.432223	496.452	10.6268	505.41	20.4891	546.139	101.436	496.452	10.6268	90.9022
9MKT12-31	87.2517	28224	2.49958	17.4102	5.68853	0.634617	6.08052	0.0801333	2.14786	0.353237	496.919	10.2721	498.968	23.9744	508.401	125.2	496.919	10.2721	97.7416
9MKT12-23	77.3319	13663.7	1.35311	17.3945	4.85532	0.635315	4.95447	0.0801494	0.986232	0.199059	497.014	4.71752	499.401	19.5465	510.359	106.786	497.014	4.71752	97.3852
9MKT12-18	9.9118	5307.66	0.445102	26.825	56.2063	0.412034	56.5203	0.0801625	5.94965	0.105266	497.093	28.4639	350.339	169.008	-536.342	1622.39	497.093	28.4639	NA
9MKT12-20	19.3758	8756.85	1.47604	15.4853	21.082	0.713791	21.6075	0.0801658	4.73635	0.2192	497.112	22.6601	546.995	91.627	760.58	449.178	497.112	22.6601	65.3596
9MKT12-56	28.4533	11419.2	1.55004	18.0844	13.9574	0.611255	14.2846	0.0801725	3.03994	0.212812	497.152	14.5451	484.351	55.0785	424.199	312.764	497.152	14.5451	117.198
9MKT12-80	62.5495	23226.3	1.76448	18.7051	5.81932	0.591087	6.0688	0.0801883	1.72219	0.283777	497.246	8.24158	471.562	22.8962	348.403	131.688	497.246	8.24158	142.722
9MKT12-53	117.14	55463.5	0.759692	17.3248	5.11374	0.638687	5.89	0.0802519	2.92264	0.496203	497.626	13.9967	501.493	23.3138	519.153	112.328	497.626	13.9967	95.8535
9MKT12-03	95.5106	4354.04	0.338203	17.3783	7.84221	0.639634	8.00486	0.0806188	1.60551	0.200566	499.815	7.72136	502.08	31.7183	512.413	172.565	499.815	7.72136	97.5416
9MKT12-98	113.411	91591.3	1.4038	17.4227	3.2536	0.638159	3.54938	0.0806387	1.41851	0.39965	499.934	6.8236	501.165	14.0405	506.794	71.6025	499.934	6.8236	98.6465
9MKT12-60	158.207	195422	0.860516	17.4142	3.40795	0.638646	3.74447	0.0806606	1.55144	0.414327	500.065	7.46491	501.468	14.8193	507.896	74.9651	500.065	7.46491	98.458
9MKT12-64	43.2977	24227.3	2.18615	17.7396	8.12238	0.628781	8.73883	0.0808988	3.22399	0.368927	501.485	15.555	495.336	34.2677	467.034	180.144	501.485	15.555	107.377
9MKT12-40	81.9102	38846	1.1581	17.0579	3.00469	0.654177	3.06854	0.0809319	0.622681	0.202925	501.683	3.00542	511.046	12.3224	553.169	65.5618	501.683	3.00542	90.6926
9MKT12-36	65.2413	25066.2	1.22947	17.6799	8.05073	0.63139	8.4103	0.0809613	2.43289	0.289275	501.858	11.7465	496.962	33.0625	474.446	178.301	501.858	11.7465	105.778
9MKT12-74	10.0723	10125.5	1.18299	15.2038	33.9488	0.738076	35.089	0.0813866	8.87232	0.252852	504.394	43.0461	561.282	152.433	799.138	731.731	504.394	43.0461	63.1172
9MKT12-51	29.7427	14959.6	1.34925	17.4097	9.3388	0.644782	9.6151	0.0814149	2.28843	0.238004	504.563	11.1063	505.263	38.2908	508.455	205.734	504.563	11.1063	99.2346
9MKT12-34	156.027	32909.6	0.717617	17.7576	2.93359	0.632746	3.8911	0.0814913	2.5563	0.656962	505.018	12.4171	497.805	15.3125	464.784	65.0266	505.018	12.4171	108.656
9MKT12-32	42.3353	49484.5	1.26041	17.7715	8.56325	0.633183	8.83254	0.0816117	2.16436	0.245044	505.736	10.5276	498.077	34.784	463.053	190.08	505.736	10.5276	109.218
9MKT12-82	11.2014	6177.48	0.891058	15.3748	31.9931	0.738369	32.9064	0.0823342	7.6989	0.233964	510.04	37.7547	561.453	142.854	775.664	689.85	510.04	37.7547	65.7553
9MKT12-90	522.639	245514	0.902447	17.4046	0.696091	0.655629	1.49373	0.0827604	1.32162	0.88478	512.578	6.51202	511.937	6.00623	509.093	15.2835	512.578	6.51202	100.684
9MKT12-11	65.7802	50778.4	1.15945	11.3716	0.969317	2.88249	1.96344	0.237732	1.70749	0.869641	1374.89	21.1416	1377.34	14.8025	1381.12	18.6261	1381.12	18.6261	99.5491
9MKT12-70	132.169	126605	1.30603	11.3469	0.286994	2.92963	2.05428	0.241095	2.03413	0.990193	1392.38	25.4731	1389.6	15.5519	1385.3	5.51111	1385.3	5.51111	100.511
9MKT12-43	180.783	334515	2.17566	10.9902	0.240334	3.16182	1.3874	0.252023	1.36643	0.984882	1448.9	17.7311	1447.89	10.7029	1446.38	4.57699	1446.38	4.57699	100.175
9MKT12-61	92.8316	114180	0.901485	10.9524	0.795134	3.20426	2.20125	0.254529	2.05263	0.932481	1461.79	26.8465	1458.19	17.0364	1452.93	15.1296	1452.93	15.1296	100.61
9MKT12-89	59.3396	120489	1.86593	10.429	2.06143	3.21669	2.79427	0.243304	1.88639	0.675092	1403.85	23.7972	1461.19	21.6472	1545.54	38.7435	1545.54	38.7435	90.8328
9MKT12-27	447.403	130962	3.1571	9.73103	0.297606	4.00012	2.43815	0.282313	2.41991	0.992522	1603	34.3446	1634.22	19.8078	1674.62	5.50052	1674.62	5.50052	95.7234
9MKT12-77	87.0923	126857	3.11926	9.70457	0.755484	4.32429	1.93504	0.304361	1.78146	0.920635	1712.9	26.7972	1698	15.9591	1679.65	13.9545	1679.65	13.9545	101.98
9MKT12-84	292.579	51271.1	0.847841	9.59227	0.271843	4.11744	1.06576	0.286449	1.03051	0.966923	1623.76	14.7919	1657.77	8.7071	1701.12	5.00574	1701.12	5.00574	95.4525
9MKT12-45	73.8313	127390	1.92295	9.57765	0.876612	4.41185	1.61733	0.306463	1.35916	0.840371	1723.28	20.5528	1714.57	13.3884	1703.92	16.1405	1703.92	16.1405	101.136
9MKT12-09	88.5121	124756	1.5399	9.5679	0.928396	4.46006	1.22885	0.309496	0.805074	0.655146	1738.23	12.2661	1723.57	10.1926	1705.8	17.0901	1705.8	17.0901	101.901
9MKT12-08	92.6892	203262	0.583876	9.53803	0.496228	4.398	2.32478	0.304237	2.27121	0.976954	1712.29	34.1534	1711.96	19.2348	1711.55	9.12711	1711.55	9.12711	100.043
9MKT12-49	278.455	193215	1.75913	9.53559	0.353154	4.23087	0.7228	0.292601	0.630652	0.872513	1654.51	9.20279	1680.03	5.9362	1712.02	6.49638	1712.02	6.49638	96.6408
9MKT12-99	244.988	353255	1.74825	9.53332	0.315373	4.49791	1.13872	0.310995	1.09418	0.960883	1745.6	16.7324	1730.59	9.4596	1712.46	5.80107	1712.46	5.80107	101.935
9MKT12-29	380.07	226705	0.642699	9.51921	0.254194	4.16653	4.02567	0.287657	4.01763	0.998004	1629.81	57.8595	1667.46	32.9759	1715.19	4.6741	1715.19	4.6741	95.0223
9MKT12-86	238.763	772198	2.90246	9.49674	0.223558	4.55629	1.28886	0.313823	1.26933	0.984842	1759.49	19.5452	1741.31	10.732	1719.53	4.10851	1719.53	4.10851	102.324
9MKT12-21	127.64	260837	2.29557	9.48625	0.381721	4.49373	1.09808	0.309172	1.0296	0.937633	1736.63	15.6744	1729.81	9.12045	1721.56	7.01345	1721.56	7.01345	100.875
9MKT12-35	194.273	333823	2.89536	9.48193	0.292256	4.44886	1.18377	0.305946	1.14713	0.969045	1720.73	17.3241	1721.49	9.81421	1722.4	5.3691	1722.4	5.3691	99.9029
9MKT12-48	100.903	106970	1.92989	9.47095	0.509981	4.55599	8.22136	0.31295	8.20553	0.998074	1755.21	126.098	1741.26	68.5573	1724.53	9.36653	1724.53	9.36653	101.779
9MKT12-01	167.416	256186	1.50367	9.45548	0.504825	4.4081	2.70654	0.302297	2.65905	0.982451	1702.69	39.7899	1713.86	22.4038	1727.53	9.26832	1727.53	9.26832	98.5621
9MKT12-24	157.551	293204	2.80632	9.45417	0.340447	4.51525	3.90021	0.309602	3.88532	0.996183	1738.75	59.2136	1733.78	32.4326	1727.78	6.25021	1727.78	6.25021	100.635
9MKT12-75	178.641	249094	2.11106	9.44729	0.350078	4.69026	3.53349	0.321368	3.51611	0.99508	1796.41	55.1278	1765.5	29.5816	1729.12	6.42594	1729.12	6.42594	103.892
9MKT12-88	190.029	202213	4.81741	9.42492	0.355494	4.64009	1.86786	0.317178	1.83372	0.981722	1775.93	28.4651	1756.51	15.6045	1733.47	6.5218	1733.47	6.5218	102.45
9MKT12-06	73.0792	86744.4	2.20671	9.39468	0.492038	4.56055	1.21301	0.31074	1.10874	0.914036	1744.35	16.9445	1742.09	10.102	1739.36	9.01842	1739.36	9.01842	100.287
9MKT12-76	119.488	302717	1.59864	9.39064	0.442061	4.57179	1.04061	0.311373	0.942049	0.905283	1747.46	14.4194	1744.14	8.67004	1740.15	8.10142	1740.15	8.10142	100.42
9MKT12-57	230.052	208035	1.922	9.38035	0.316509	4.66766	1.21102	0.317553	1.16892	0.965242	1777.77	18.1616	1761.46	10.1272	1742.16	5.79852	1742.16	5.79852	102.044
9MKT12-63	737.853	5795.05	17.9916	9.37364	0.359556	4.08928	2.09478	0.278006	2.06369	0.985159	1581.31	28.9392	1652.17	17.0923	1743.47	6.58634	1743.47	6.58634	90.6991
9MKT12-16	84.509	197314	3.25013	9.34103	0.511181	4.67087	1.16242	0.31644	1.04399	0.898117	1772.32	16.1773	1762.04	9.72196	1749.85	9.35714	1749.85	9.35714	101.284
9MKT12-83	163.584	176110	1.32015	9.32912	0.535868	4.64463	0.866063	0.314261	0.680375	0.785596	1761.64	10.4876	1757.33	7.23606	1752.19	9.80807	1752.19	9.80807	100.54
9MKT12-04	78.0542	167274	4.05359	9.29021	1.39028	4.67859	1.85124	0.315238	1.22237	0.6603	1766.43	18.8868	1763.42	15.4882	1759.83	25.4198	1759.83	25.4198	100.375
9MKT12-37	551.624	16010.1	0.932115	9.23516	0.324565	4.05043	2.19149	0.271296	2.16733	0.988972	1547.38	29.8155	1644.39	17.8479	1770.69	5.92685	1770.69	5.92685	87.3883
9MKT12-33	62.9475	83922.3	0.725598	9.20874	1.0808	4.86639	1.59359	0.325017	1.17106	0.73486	1814.18	18.5176	1796.46	13.4236	1775.92	19.7225	1775.92	19.7225	102.154
9MKT12-95	43.6605	111208	1.43858	6.26004	0.936356	10.1798	1.07667	0.462186	0.531474	0.493626	2449.2	10.8297	2451.25	9.95482	2452.93	15.8358	2452.93	15.8358	99.8478
9MKT12-81	128.153	338686	1.41084	6.15441	0.159492	10.6241	0.672116	0.474217	0.652919	0.971437	2502.03	13.5392	2490.82	6.23753	2481.67	2.69003	2481.67	2.69003	100.82
9MKT12-39	43.3017	90768.7	2.75159	5.86342	0.589571	11.2557	1.4977	0.478655	1.37677	0.91926	2521.4	28.7302	2544.54	13.9674	2563.02	9.86432	2563.02	9.86432	98.3762
9MKT12-100	216.277	348838	2.1641	5.55936	0.135903	12.2046	1.01884	0.492094	1.00974	0.991064	2579.73	21.4674	2620.26	9.56199	2651.72	2.25449	2651.72	2.25449	97.2852
9MKT12-55	73.7588	281968	1.31947	5.34267	0.221692	13.2192	2.1624	0.512226	2.151	0.994731	2666.12	46.9691	2695.43	20.4152	2717.46	3.65489	2717.46	3.65489	98.1109
9MKT12-50	97.2352	631851	1.09383	4.88965	0.19307	15.8856	1.36374	0.563351	1.35	0.989928	2880.46	31.3601	2869.94	13.0278	2862.55	3.14131	2862.55	3.14131	100.626
9MKT12-72	138.28	470594	2.59776	4.84827	0.207066	16.486	1.3714	0.579698	1.35568	0.988535	2947.52	32.0705	2905.42	13.1293	2876.37	3.36484	2876.37	3.36484	102.474
9MKT12-87	55.7187	404397	1.17878	4.84195	0.255405	16.2759	0.887916	0.571561	0.85039	0.957737	2914.23	19.9374	2893.14	8.49408	2878.49	4.14957	2878.49	4.14957	101.242
Table 01-MKT-13. U-Pb geochronologic analyses.
							Isotope ratios						Apparent ages (Ma)
Analysis	U	206Pb	U/Th	206Pb*	±	207Pb*	±	206Pb*	±	error	206Pb*	±	207Pb*	±	206Pb*	±	Best age	±	Conc
	(ppm)	204Pb		207Pb*	(%)	235U*	(%)	238U	(%)	corr.	238U*	(Ma)	235U	(Ma)	207Pb*	(Ma)	(Ma)	(Ma)	(%)
1MKT13-66 <>	112.178	2367.85	0.765034	16.7973	3.76958	0.438338	5.68967	0.0534008	4.26177	0.749036	335.367	13.9272	369.08	17.608	586.657	81.8276	335.367	13.9272	NA
1MKT13-70 <>	79.5704	3701.26	0.693924	15.1523	7.44916	0.492898	8.18543	0.0541669	3.39284	0.414498	340.053	11.2385	406.884	27.4476	806.25	156.125	340.053	11.2385	NA
1MKT13-3 <>	646.906	4441.03	0.277706	17.4647	1.94148	0.510337	5.02765	0.0646424	4.63767	0.922432	403.797	18.1523	418.676	17.2512	501.494	42.7301	403.797	18.1523	80.5187
1MKT13-84 <>	344.415	26160.8	1.5688	17.2178	1.89989	0.533884	8.40536	0.0666688	8.18782	0.97412	416.055	32.9901	434.384	29.7142	532.784	41.6293	416.055	32.9901	78.0907
1MKT13-39 <>	109.181	1499.7	0.558961	17.3417	5.60267	0.548002	5.88639	0.0689242	1.80545	0.306717	429.671	7.50463	443.687	21.1618	517.021	123.125	429.671	7.50463	83.1051
1MKT13-48 <>	74.8072	7755.26	0.952447	16.9985	7.71874	0.570621	10.071	0.0703487	6.46883	0.642323	438.256	27.408	458.416	37.1683	560.749	168.471	438.256	27.408	78.1556
1MKT13-35 <>	52.7216	14685.5	1.10736	18.5619	15.9982	0.531141	16.4865	0.0715042	3.98247	0.24156	445.211	17.132	432.567	58.1335	365.755	362.671	445.211	17.132	121.724
1MKT13-14 <>	90.8341	22243.4	1.21916	18.1014	5.2545	0.550983	5.47724	0.0723351	1.54608	0.282273	450.209	6.72309	445.64	19.7596	422.101	117.345	450.209	6.72309	106.659
1MKT13-86 <>	61.4136	4397.76	0.702677	17.1116	13.288	0.585653	14.0164	0.0726826	4.45961	0.318171	452.298	19.4794	468.088	52.6123	546.268	291.488	452.298	19.4794	82.7977
1MKT13-1 <>	82.8861	39630.1	0.93448	18.0914	6.66284	0.556213	7.38572	0.0729814	3.18677	0.431476	454.093	13.973	449.059	26.81	423.339	148.815	454.093	13.973	107.265
1MKT13-87 <>	88.1761	10460.8	0.805855	16.5979	7.42923	0.607265	8.4956	0.0731022	4.12089	0.485062	454.818	18.0967	481.834	32.6035	612.493	160.713	454.818	18.0967	74.2569
1MKT13-69 <>	211.211	9241.02	0.287923	17.2745	3.56039	0.594002	3.99216	0.0744204	1.80582	0.452341	462.732	8.06326	473.42	15.1067	525.536	78.084	462.732	8.06326	88.0496
1MKT13-37 <>	106.252	31323	0.980683	17.691	8.91423	0.591429	9.88439	0.0758848	4.27056	0.432051	471.513	19.4175	471.78	37.3156	473.089	197.545	471.513	19.4175	99.6667
1MKT13-82 <>	34.8193	7657.57	1.28155	17.8314	16.256	0.600151	16.9077	0.0776147	4.64913	0.27497	481.869	21.586	477.33	64.476	455.572	362.889	481.869	21.586	105.773
1MKT13-57 <>	62.4232	7586.02	1.60332	17.567	8.29179	0.609818	8.81752	0.0776958	2.99914	0.340134	482.355	13.9385	483.446	33.9282	488.622	183.221	482.355	13.9385	98.7172
1MKT13-4 <>	58.8208	16274.9	1.24772	17.3343	10.2655	0.621231	10.5458	0.0781013	2.41503	0.229004	484.779	11.2782	490.619	41.0539	517.954	225.898	484.779	11.2782	93.5951
1MKT13-23 <>	57.2089	14171.4	1.39382	17.1041	8.74452	0.630558	9.55139	0.0782212	3.84221	0.402267	485.497	17.9687	496.444	37.5218	547.226	191.347	485.497	17.9687	88.7197
1MKT13-17 <>	114.879	34933.8	0.882456	17.1194	4.32883	0.632043	4.63476	0.0784754	1.65597	0.357293	487.016	7.76772	497.368	18.2271	545.318	94.6525	487.016	7.76772	89.3087
1MKT13-13 <>	27.5411	5350.03	0.536126	18.2271	23.7477	0.593835	24.7685	0.0785022	7.03725	0.284121	487.177	33.0207	473.313	93.97	406.636	538.278	487.177	33.0207	119.807
1MKT13-47 <>	57.0618	8838.71	1.4312	16.412	6.57365	0.659833	7.21226	0.0785405	2.96714	0.411402	487.405	13.9288	514.512	29.1199	636.825	141.593	487.405	13.9288	76.5368
1MKT13-11 <>	109.959	2317.29	0.577348	16.4276	8.03035	0.662474	9.16237	0.0789299	4.41165	0.481496	489.732	20.805	516.126	37.089	634.779	173.119	489.732	20.805	77.1501
1MKT13-45 <>	56.1143	12704.8	0.793535	17.9873	7.94742	0.60578	8.46714	0.0790276	2.92077	0.344953	490.316	13.7899	480.895	32.4447	436.205	177.188	490.316	13.7899	112.405
1MKT13-18 <>	227.154	119844	0.806608	17.3663	1.54224	0.629082	2.54485	0.0792342	2.02429	0.795447	491.55	9.58051	495.524	9.97861	513.921	33.9036	491.55	9.58051	95.6471
1MKT13-2 <>	44.3829	10785.3	0.862403	19.0649	11.3212	0.574016	11.7385	0.07937	3.10212	0.264269	492.361	14.705	460.608	43.4933	305.192	258.686	492.361	14.705	161.328
1MKT13-16 <>	275.478	12519.2	0.724503	15.6998	12.6774	0.698332	13.6616	0.079516	5.09159	0.372693	493.233	24.1769	537.794	57.099	731.541	269.56	493.233	24.1769	67.4239
1MKT13-19 <>	93.8408	39929	0.744493	17.9583	7.9001	0.61129	8.13346	0.0796179	1.93432	0.237822	493.841	9.19573	484.374	31.3413	439.796	176.028	493.841	9.19573	112.289
1MKT13-24 <>	358.387	71166.3	0.705309	17.5673	1.61371	0.62496	2.2824	0.0796261	1.61408	0.707188	493.891	7.67407	492.951	8.91336	488.582	35.6069	493.891	7.67407	101.086
1MKT13-5 <>	231.146	105206	0.809703	17.5896	1.69324	0.624334	2.22767	0.0796472	1.44757	0.649812	494.017	6.88407	492.56	8.69426	485.786	37.3802	494.017	6.88407	101.694
1MKT13-12 <>	220.341	107964	1.6046	17.2936	3.13521	0.635437	3.2915	0.0796998	1.00221	0.304486	494.331	4.76906	499.477	12.9863	523.107	68.7646	494.331	4.76906	94.4989
1MKT13-94 <>	83.3137	13307.6	0.501235	17.2021	5.87852	0.640549	6.51566	0.0799157	2.81013	0.431289	495.619	13.4056	502.646	25.8372	534.773	128.806	495.619	13.4056	92.6784
1MKT13-20 <>	111.021	20099.4	0.59133	17.374	5.05422	0.635239	5.67139	0.0800452	2.57286	0.453656	496.392	12.2922	499.354	22.3741	512.93	111.117	496.392	12.2922	96.7758
1MKT13-81 <>	39.6848	11016.9	0.634923	15.982	10.2661	0.69148	11.7383	0.0801511	5.69164	0.484877	497.024	27.2259	533.689	48.7621	693.683	219.394	497.024	27.2259	71.6501
1MKT13-26 <>	207.876	28981.5	0.753128	17.226	1.70721	0.642253	2.04593	0.0802398	1.12751	0.551099	497.554	5.39895	503.7	8.1245	531.733	37.4059	497.554	5.39895	93.5722
1MKT13-95 <>	65.4702	12810.6	1.07248	16.767	8.75261	0.660319	9.09748	0.0802987	2.48115	0.272729	497.905	11.8887	514.809	36.7539	590.583	190.131	497.905	11.8887	84.3074
1MKT13-31 <>	95.5635	24712.1	1.25981	17.2471	7.68571	0.64234	7.83564	0.080349	1.5255	0.194687	498.206	7.31386	503.754	31.1274	529.054	168.654	498.206	7.31386	94.1692
1MKT13-10 <>	55.2511	21042.4	1.60058	16.9999	6.47973	0.652161	6.97592	0.0804081	2.58392	0.370405	498.558	12.3968	509.808	27.9669	560.605	141.377	498.558	12.3968	88.9321
1MKT13-7 <>	80.4943	24885.1	1.03487	17.6356	5.54772	0.63047	6.27908	0.0806405	2.94105	0.468388	499.945	14.1479	496.389	24.6583	480	122.672	499.945	14.1479	104.155
1MKT13-30 <>	167.491	55843.7	0.992465	17.5298	2.83154	0.634683	3.23613	0.0806925	1.56682	0.484164	500.255	7.54167	499.009	12.7586	493.297	62.4563	500.255	7.54167	101.411
1MKT13-75 <>	129.855	65815.3	1.07851	17.3439	5.0614	0.642025	5.41078	0.0807602	1.91278	0.353512	500.659	9.21405	503.559	21.4846	516.737	111.202	500.659	9.21405	96.8885
1MKT13-80 <>	72.1901	17775.9	0.908863	18.3195	8.01807	0.608614	8.18562	0.080864	1.64773	0.201296	501.278	7.94673	482.685	31.4565	395.304	180.041	501.278	7.94673	126.808
1MKT13-36 <>	53.7014	388.574	0.840563	14.2385	35.0905	0.784045	35.4699	0.0809662	5.17397	0.145869	501.887	24.9825	587.788	159.581	935.167	742.185	501.887	24.9825	53.6682
1MKT13-65 <>	104.198	29518.7	0.885933	17.5021	6.78021	0.637912	7.13358	0.0809747	2.21738	0.310836	501.938	10.7076	501.013	28.2176	496.767	149.548	501.938	10.7076	101.041
1MKT13-85 <>	85.8995	8015.66	1.22334	16.7244	5.32493	0.667913	5.84552	0.0810158	2.41147	0.412534	502.183	11.6503	519.443	23.7727	596.087	115.438	502.183	11.6503	84.2466
1MKT13-91 <>	75.4239	17268.3	0.643871	18.6993	7.63124	0.597524	8.11345	0.0810361	2.75541	0.339611	502.304	13.3151	475.661	30.8231	349.155	172.746	502.304	13.3151	143.863
1MKT13-32 <>	106.367	18959.2	1.40883	17.3393	6.06114	0.644763	6.37879	0.0810831	1.98785	0.311634	502.584	9.61109	505.251	25.3954	517.32	133.187	502.584	9.61109	97.1515
1MKT13-99 <>	128.999	39088	0.544682	17.6424	3.7568	0.633726	4.20754	0.0810881	1.89469	0.450308	502.614	9.1612	498.414	16.5737	479.149	83.0513	502.614	9.1612	104.897
1MKT13-93 <>	326.718	125914	0.714771	17.2687	1.8944	0.648205	2.86929	0.0811839	2.15501	0.751061	503.185	10.4313	507.373	11.4584	526.317	41.5331	503.185	10.4313	95.6049
1MKT13-54 <>	58.5495	20721.1	1.24603	18.1584	11.024	0.618672	11.2829	0.0814772	2.40342	0.213014	504.934	11.6726	489.014	43.815	415.084	247.017	504.934	11.6726	121.646
1MKT13-22 <>	49.5893	18622.7	1.47113	17.8519	13.8814	0.629967	14.2381	0.0815643	3.16709	0.222437	505.453	15.3967	496.075	55.932	453.003	309.483	505.453	15.3967	111.578
1MKT13-100 <>	97.7547	13996.4	1.36908	17.6651	7.88134	0.638638	8.1689	0.081822	2.14836	0.262992	506.989	10.4746	501.463	32.3379	476.334	174.5	506.989	10.4746	106.436
1MKT13-52 <>	47.4003	23871.7	0.712432	18.7992	12.0904	0.600614	12.2671	0.0818905	2.07475	0.169131	507.397	10.1236	477.623	46.7724	337.088	274.787	507.397	10.1236	150.524
1MKT13-89 <>	56.9171	34783.3	1.45917	17.8865	8.79487	0.631412	9.08717	0.08191	2.28625	0.251591	507.513	11.1581	496.975	35.7262	448.7	195.713	507.513	11.1581	113.107
1MKT13-34 <>	320.5	94776	1.4843	17.2756	1.70826	0.656087	2.1586	0.0822041	1.31963	0.611336	509.265	6.46183	512.218	8.68344	525.395	37.436	509.265	6.46183	96.9299
1MKT13-29 <>	75.4945	32715.4	0.773223	17.348	9.56087	0.654212	9.7267	0.0823129	1.78842	0.183868	509.913	8.76807	511.068	39.0784	516.215	210.408	509.913	8.76807	98.7792
1MKT13-68 <>	110.525	28837.7	0.419722	17.9941	5.55095	0.631248	5.71579	0.0823815	1.36279	0.238425	510.322	6.68644	496.873	22.4624	435.354	123.696	510.322	6.68644	117.22
1MKT13-28 <>	20.1573	5099.1	0.562176	21.261	32.2526	0.534972	32.4484	0.0824922	3.55926	0.10969	510.981	17.485	435.104	115.323	50.9787	787.88	510.981	17.485	102.343
1MKT13-90 <>	104.128	40039.9	1.38453	18.58	5.68571	0.612846	5.74145	0.082584	0.798097	0.139006	511.528	3.92472	485.353	22.1554	363.559	128.3	511.528	3.92472	140.7
1MKT13-77 <>	318.777	98714.7	0.77532	17.0306	1.45367	0.669234	2.27734	0.0826622	1.75303	0.769772	511.994	8.62824	520.246	9.27108	556.63	31.7197	511.994	8.62824	91.981
1MKT13-96 <>	132.718	99150.7	1.45957	17.4281	3.29999	0.654906	3.89084	0.0827802	2.06123	0.529766	512.696	10.1585	511.493	15.6355	506.116	72.6236	512.696	10.1585	101.3
1MKT13-98 <>	293.149	54813.1	0.794262	17.4874	2.56039	0.652984	3.0884	0.0828181	1.72702	0.559195	512.922	8.51499	510.313	12.3885	498.621	56.4251	512.922	8.51499	102.868
1MKT13-53 <>	485.298	218275	0.310843	17.3028	1.3082	0.660277	2.75307	0.0828593	2.42239	0.879889	513.167	11.949	514.783	11.1176	521.944	28.6996	513.167	11.949	98.3185
1MKT13-62 <>	32.834	13840.6	0.830653	18.2374	21.0354	0.629316	21.3033	0.0832398	3.36787	0.158091	515.432	16.6833	495.67	83.7382	405.369	475.559	515.432	16.6833	127.151
1MKT13-72 <>	36.3377	7578.58	1.35661	17.5124	14.468	0.655563	14.8057	0.0832645	3.14414	0.212359	515.579	15.5792	511.896	59.5973	495.481	320.353	515.579	15.5792	104.056
1MKT13-58 <>	45.5337	16668.9	1.24681	19.0768	12.9907	0.60189	13.1286	0.0832764	1.89778	0.144554	515.65	9.40477	478.432	50.1285	303.75	297.169	515.65	9.40477	169.761
1MKT13-79 <>	134.422	17676.2	1.25815	17.3136	3.16688	0.664993	4.14434	0.0835032	2.67328	0.645044	516.999	13.2812	517.664	16.8085	520.578	69.5296	516.999	13.2812	99.3125
1MKT13-78 <>	41.9059	543.048	1.07814	15.0332	18.8327	0.7679	19.6991	0.083725	5.77774	0.2933	518.319	28.775	578.557	87.0935	822.781	396.469	518.319	28.775	62.996
1MKT13-60 <>	769.859	272472	0.387612	17.3161	0.645394	0.66706	1.60837	0.0837747	1.4732	0.915958	518.614	7.34096	518.923	6.53483	520.262	14.1799	518.614	7.34096	99.6834
1MKT13-76 <>	29.1156	9824.77	1.12565	19.563	23.5058	0.594108	24.2936	0.0842948	6.13664	0.252603	521.707	30.7543	473.488	92.1851	246.108	547.967	521.707	30.7543	211.983
1MKT13-61 <>	133.585	49347.2	1.17326	17.704	3.4571	0.661217	3.90513	0.0849012	1.81618	0.465076	525.311	9.16223	515.358	15.7841	471.458	76.545	525.311	9.16223	111.423
1MKT13-97 <>	68.9457	10002.9	0.843331	17.8038	8.7452	0.66513	10.5513	0.0858849	5.90344	0.559501	531.154	30.0995	517.747	42.8203	459.034	194.273	531.154	30.0995	115.711
1MKT13-49 <>	238.781	41778	1.31344	11.032	0.66418	2.99177	2.42682	0.239376	2.33416	0.96182	1383.45	29.0623	1405.53	18.4704	1439.15	12.6613	1439.15	12.6613	96.1302
1MKT13-74 <>	124.737	135966	1.0259	11.0072	1.35527	3.30605	3.29243	0.263927	3.00056	0.91135	1509.9	40.3912	1482.48	25.6726	1443.44	25.8215	1443.44	25.8215	104.604
1MKT13-15 <>	176.687	211132	1.75382	9.66741	0.633713	4.27057	2.16345	0.299429	2.06856	0.956138	1688.48	30.7278	1687.71	17.8012	1686.73	11.6947	1686.73	11.6947	100.104
1MKT13-33 <>	152.013	44167.7	2.49181	9.60293	0.373996	3.82854	3.75295	0.266646	3.73427	0.995022	1523.75	50.6771	1598.76	30.2237	1699.07	6.88925	1699.07	6.88925	89.6816
1MKT13-42 <>	253.572	280453	2.42246	9.54063	0.280139	4.50022	1.13663	0.311394	1.10157	0.969152	1747.56	16.8619	1731.01	9.44311	1711.05	5.15388	1711.05	5.15388	102.134
1MKT13-64 <>	152.639	131166	0.878298	9.53489	0.61341	4.42433	1.19979	0.305958	1.03113	0.859423	1720.79	15.5727	1716.91	9.93688	1712.16	11.282	1712.16	11.282	100.504
1MKT13-56 <>	125.732	72977.7	2.2928	9.50025	0.549164	4.54265	1.5072	0.312999	1.40359	0.931258	1755.45	21.5694	1738.82	12.5434	1718.85	10.0934	1718.85	10.0934	102.129
1MKT13-46 <>	181.124	294102	1.97184	9.48979	0.418378	4.46989	1.35653	0.307647	1.2904	0.951251	1729.12	19.5707	1725.4	11.2563	1720.88	7.68763	1720.88	7.68763	100.479
1MKT13-9 <>	211.236	205964	2.57729	9.48762	0.286811	4.51699	1.77901	0.310817	1.75574	0.986919	1744.73	26.8377	1734.1	14.7906	1721.29	5.26982	1721.29	5.26982	101.361
1MKT13-21 <>	179.229	188502	2.18844	9.48256	0.467999	4.41059	1.66758	0.303334	1.60056	0.959811	1707.82	24.0137	1714.33	13.8037	1722.28	8.5979	1722.28	8.5979	99.1607
1MKT13-59 <>	251.228	290102	2.58707	9.47124	0.403437	4.42586	4.46186	0.304021	4.44358	0.995904	1711.22	66.7861	1717.19	36.9714	1724.47	7.40973	1724.47	7.40973	99.2316
1MKT13-67 <>	223.144	219818	2.9866	9.46854	0.425596	4.51227	1.51147	0.309868	1.45031	0.959538	1740.06	22.1172	1733.24	12.5636	1724.99	7.8162	1724.99	7.8162	100.873
1MKT13-88 <>	189.359	337372	2.14423	9.38292	0.706135	4.63546	1.25279	0.315449	1.03482	0.826014	1767.47	15.9971	1755.68	10.4638	1741.66	12.9397	1741.66	12.9397	101.482
1MKT13-43 <>	183.208	134898	9.07123	9.32785	0.771856	3.90099	2.18978	0.263909	2.04924	0.935819	1509.81	27.5837	1613.89	17.6997	1752.44	14.1253	1752.44	14.1253	86.1551
1MKT13-55 <>	280.869	56889.6	1.46505	9.23456	0.319093	4.53647	2.32277	0.303832	2.30075	0.990519	1710.28	34.5623	1737.68	19.3274	1770.81	5.82684	1770.81	5.82684	96.5818
1MKT13-73 <>	82.2416	75588.5	2.61682	9.05988	0.784203	4.94694	2.31669	0.325056	2.17992	0.940966	1814.37	34.4736	1810.3	19.5701	1805.61	14.2571	1805.61	14.2571	100.486
1MKT13-6 <>	56.4389	57814.6	0.58957	8.86034	1.06753	5.20446	1.70924	0.334445	1.33487	0.780975	1859.89	21.5667	1853.35	14.5591	1846	19.3137	1846	19.3137	100.753
1MKT13-41 <>	207.128	202158	1.26149	5.74033	0.189496	11.9459	3.07678	0.49734	3.07094	0.998102	2602.36	65.7564	2600.17	28.8357	2598.45	3.1565	2598.45	3.1565	100.15
Table 01-MKT-13. U-Pb geochronologic analyses.
							Isotope ratios						Apparent ages (Ma)
Analysis	U	206Pb	U/Th	206Pb*	±	207Pb*	±	206Pb*	±	error	206Pb*	±	207Pb*	±	206Pb*	±	Best age	±	Conc
	(ppm)	204Pb		207Pb*	(%)	235U*	(%)	238U	(%)	corr.	238U*	(Ma)	235U	(Ma)	207Pb*	(Ma)	(Ma)	(Ma)	(%)
1MKT13-66 <>	112.178	2367.85	0.765034	16.7973	3.76958	0.438338	5.68967	0.0534008	4.26177	0.749036	335.367	13.9272	369.08	17.608	586.657	81.8276	335.367	13.9272	NA
1MKT13-70 <>	79.5704	3701.26	0.693924	15.1523	7.44916	0.492898	8.18543	0.0541669	3.39284	0.414498	340.053	11.2385	406.884	27.4476	806.25	156.125	340.053	11.2385	NA
1MKT13-3 <>	646.906	4441.03	0.277706	17.4647	1.94148	0.510337	5.02765	0.0646424	4.63767	0.922432	403.797	18.1523	418.676	17.2512	501.494	42.7301	403.797	18.1523	80.5187
1MKT13-84 <>	344.415	26160.8	1.5688	17.2178	1.89989	0.533884	8.40536	0.0666688	8.18782	0.97412	416.055	32.9901	434.384	29.7142	532.784	41.6293	416.055	32.9901	78.0907
1MKT13-39 <>	109.181	1499.7	0.558961	17.3417	5.60267	0.548002	5.88639	0.0689242	1.80545	0.306717	429.671	7.50463	443.687	21.1618	517.021	123.125	429.671	7.50463	83.1051
1MKT13-48 <>	74.8072	7755.26	0.952447	16.9985	7.71874	0.570621	10.071	0.0703487	6.46883	0.642323	438.256	27.408	458.416	37.1683	560.749	168.471	438.256	27.408	78.1556
1MKT13-35 <>	52.7216	14685.5	1.10736	18.5619	15.9982	0.531141	16.4865	0.0715042	3.98247	0.24156	445.211	17.132	432.567	58.1335	365.755	362.671	445.211	17.132	121.724
1MKT13-14 <>	90.8341	22243.4	1.21916	18.1014	5.2545	0.550983	5.47724	0.0723351	1.54608	0.282273	450.209	6.72309	445.64	19.7596	422.101	117.345	450.209	6.72309	106.659
1MKT13-86 <>	61.4136	4397.76	0.702677	17.1116	13.288	0.585653	14.0164	0.0726826	4.45961	0.318171	452.298	19.4794	468.088	52.6123	546.268	291.488	452.298	19.4794	82.7977
1MKT13-1 <>	82.8861	39630.1	0.93448	18.0914	6.66284	0.556213	7.38572	0.0729814	3.18677	0.431476	454.093	13.973	449.059	26.81	423.339	148.815	454.093	13.973	107.265
1MKT13-87 <>	88.1761	10460.8	0.805855	16.5979	7.42923	0.607265	8.4956	0.0731022	4.12089	0.485062	454.818	18.0967	481.834	32.6035	612.493	160.713	454.818	18.0967	74.2569
1MKT13-69 <>	211.211	9241.02	0.287923	17.2745	3.56039	0.594002	3.99216	0.0744204	1.80582	0.452341	462.732	8.06326	473.42	15.1067	525.536	78.084	462.732	8.06326	88.0496
1MKT13-37 <>	106.252	31323	0.980683	17.691	8.91423	0.591429	9.88439	0.0758848	4.27056	0.432051	471.513	19.4175	471.78	37.3156	473.089	197.545	471.513	19.4175	99.6667
1MKT13-82 <>	34.8193	7657.57	1.28155	17.8314	16.256	0.600151	16.9077	0.0776147	4.64913	0.27497	481.869	21.586	477.33	64.476	455.572	362.889	481.869	21.586	105.773
1MKT13-57 <>	62.4232	7586.02	1.60332	17.567	8.29179	0.609818	8.81752	0.0776958	2.99914	0.340134	482.355	13.9385	483.446	33.9282	488.622	183.221	482.355	13.9385	98.7172
1MKT13-4 <>	58.8208	16274.9	1.24772	17.3343	10.2655	0.621231	10.5458	0.0781013	2.41503	0.229004	484.779	11.2782	490.619	41.0539	517.954	225.898	484.779	11.2782	93.5951
1MKT13-23 <>	57.2089	14171.4	1.39382	17.1041	8.74452	0.630558	9.55139	0.0782212	3.84221	0.402267	485.497	17.9687	496.444	37.5218	547.226	191.347	485.497	17.9687	88.7197
1MKT13-17 <>	114.879	34933.8	0.882456	17.1194	4.32883	0.632043	4.63476	0.0784754	1.65597	0.357293	487.016	7.76772	497.368	18.2271	545.318	94.6525	487.016	7.76772	89.3087
1MKT13-13 <>	27.5411	5350.03	0.536126	18.2271	23.7477	0.593835	24.7685	0.0785022	7.03725	0.284121	487.177	33.0207	473.313	93.97	406.636	538.278	487.177	33.0207	119.807
1MKT13-47 <>	57.0618	8838.71	1.4312	16.412	6.57365	0.659833	7.21226	0.0785405	2.96714	0.411402	487.405	13.9288	514.512	29.1199	636.825	141.593	487.405	13.9288	76.5368
1MKT13-11 <>	109.959	2317.29	0.577348	16.4276	8.03035	0.662474	9.16237	0.0789299	4.41165	0.481496	489.732	20.805	516.126	37.089	634.779	173.119	489.732	20.805	77.1501
1MKT13-45 <>	56.1143	12704.8	0.793535	17.9873	7.94742	0.60578	8.46714	0.0790276	2.92077	0.344953	490.316	13.7899	480.895	32.4447	436.205	177.188	490.316	13.7899	112.405
1MKT13-18 <>	227.154	119844	0.806608	17.3663	1.54224	0.629082	2.54485	0.0792342	2.02429	0.795447	491.55	9.58051	495.524	9.97861	513.921	33.9036	491.55	9.58051	95.6471
1MKT13-2 <>	44.3829	10785.3	0.862403	19.0649	11.3212	0.574016	11.7385	0.07937	3.10212	0.264269	492.361	14.705	460.608	43.4933	305.192	258.686	492.361	14.705	161.328
1MKT13-16 <>	275.478	12519.2	0.724503	15.6998	12.6774	0.698332	13.6616	0.079516	5.09159	0.372693	493.233	24.1769	537.794	57.099	731.541	269.56	493.233	24.1769	67.4239
1MKT13-19 <>	93.8408	39929	0.744493	17.9583	7.9001	0.61129	8.13346	0.0796179	1.93432	0.237822	493.841	9.19573	484.374	31.3413	439.796	176.028	493.841	9.19573	112.289
1MKT13-24 <>	358.387	71166.3	0.705309	17.5673	1.61371	0.62496	2.2824	0.0796261	1.61408	0.707188	493.891	7.67407	492.951	8.91336	488.582	35.6069	493.891	7.67407	101.086
1MKT13-5 <>	231.146	105206	0.809703	17.5896	1.69324	0.624334	2.22767	0.0796472	1.44757	0.649812	494.017	6.88407	492.56	8.69426	485.786	37.3802	494.017	6.88407	101.694
1MKT13-12 <>	220.341	107964	1.6046	17.2936	3.13521	0.635437	3.2915	0.0796998	1.00221	0.304486	494.331	4.76906	499.477	12.9863	523.107	68.7646	494.331	4.76906	94.4989
1MKT13-94 <>	83.3137	13307.6	0.501235	17.2021	5.87852	0.640549	6.51566	0.0799157	2.81013	0.431289	495.619	13.4056	502.646	25.8372	534.773	128.806	495.619	13.4056	92.6784
1MKT13-20 <>	111.021	20099.4	0.59133	17.374	5.05422	0.635239	5.67139	0.0800452	2.57286	0.453656	496.392	12.2922	499.354	22.3741	512.93	111.117	496.392	12.2922	96.7758
1MKT13-81 <>	39.6848	11016.9	0.634923	15.982	10.2661	0.69148	11.7383	0.0801511	5.69164	0.484877	497.024	27.2259	533.689	48.7621	693.683	219.394	497.024	27.2259	71.6501
1MKT13-26 <>	207.876	28981.5	0.753128	17.226	1.70721	0.642253	2.04593	0.0802398	1.12751	0.551099	497.554	5.39895	503.7	8.1245	531.733	37.4059	497.554	5.39895	93.5722
1MKT13-95 <>	65.4702	12810.6	1.07248	16.767	8.75261	0.660319	9.09748	0.0802987	2.48115	0.272729	497.905	11.8887	514.809	36.7539	590.583	190.131	497.905	11.8887	84.3074
1MKT13-31 <>	95.5635	24712.1	1.25981	17.2471	7.68571	0.64234	7.83564	0.080349	1.5255	0.194687	498.206	7.31386	503.754	31.1274	529.054	168.654	498.206	7.31386	94.1692
1MKT13-10 <>	55.2511	21042.4	1.60058	16.9999	6.47973	0.652161	6.97592	0.0804081	2.58392	0.370405	498.558	12.3968	509.808	27.9669	560.605	141.377	498.558	12.3968	88.9321
1MKT13-7 <>	80.4943	24885.1	1.03487	17.6356	5.54772	0.63047	6.27908	0.0806405	2.94105	0.468388	499.945	14.1479	496.389	24.6583	480	122.672	499.945	14.1479	104.155
1MKT13-30 <>	167.491	55843.7	0.992465	17.5298	2.83154	0.634683	3.23613	0.0806925	1.56682	0.484164	500.255	7.54167	499.009	12.7586	493.297	62.4563	500.255	7.54167	101.411
1MKT13-75 <>	129.855	65815.3	1.07851	17.3439	5.0614	0.642025	5.41078	0.0807602	1.91278	0.353512	500.659	9.21405	503.559	21.4846	516.737	111.202	500.659	9.21405	96.8885
1MKT13-80 <>	72.1901	17775.9	0.908863	18.3195	8.01807	0.608614	8.18562	0.080864	1.64773	0.201296	501.278	7.94673	482.685	31.4565	395.304	180.041	501.278	7.94673	126.808
1MKT13-36 <>	53.7014	388.574	0.840563	14.2385	35.0905	0.784045	35.4699	0.0809662	5.17397	0.145869	501.887	24.9825	587.788	159.581	935.167	742.185	501.887	24.9825	53.6682
1MKT13-65 <>	104.198	29518.7	0.885933	17.5021	6.78021	0.637912	7.13358	0.0809747	2.21738	0.310836	501.938	10.7076	501.013	28.2176	496.767	149.548	501.938	10.7076	101.041
1MKT13-85 <>	85.8995	8015.66	1.22334	16.7244	5.32493	0.667913	5.84552	0.0810158	2.41147	0.412534	502.183	11.6503	519.443	23.7727	596.087	115.438	502.183	11.6503	84.2466
1MKT13-91 <>	75.4239	17268.3	0.643871	18.6993	7.63124	0.597524	8.11345	0.0810361	2.75541	0.339611	502.304	13.3151	475.661	30.8231	349.155	172.746	502.304	13.3151	143.863
1MKT13-32 <>	106.367	18959.2	1.40883	17.3393	6.06114	0.644763	6.37879	0.0810831	1.98785	0.311634	502.584	9.61109	505.251	25.3954	517.32	133.187	502.584	9.61109	97.1515
1MKT13-99 <>	128.999	39088	0.544682	17.6424	3.7568	0.633726	4.20754	0.0810881	1.89469	0.450308	502.614	9.1612	498.414	16.5737	479.149	83.0513	502.614	9.1612	104.897
1MKT13-93 <>	326.718	125914	0.714771	17.2687	1.8944	0.648205	2.86929	0.0811839	2.15501	0.751061	503.185	10.4313	507.373	11.4584	526.317	41.5331	503.185	10.4313	95.6049
1MKT13-54 <>	58.5495	20721.1	1.24603	18.1584	11.024	0.618672	11.2829	0.0814772	2.40342	0.213014	504.934	11.6726	489.014	43.815	415.084	247.017	504.934	11.6726	121.646
1MKT13-22 <>	49.5893	18622.7	1.47113	17.8519	13.8814	0.629967	14.2381	0.0815643	3.16709	0.222437	505.453	15.3967	496.075	55.932	453.003	309.483	505.453	15.3967	111.578
1MKT13-100 <>	97.7547	13996.4	1.36908	17.6651	7.88134	0.638638	8.1689	0.081822	2.14836	0.262992	506.989	10.4746	501.463	32.3379	476.334	174.5	506.989	10.4746	106.436
1MKT13-52 <>	47.4003	23871.7	0.712432	18.7992	12.0904	0.600614	12.2671	0.0818905	2.07475	0.169131	507.397	10.1236	477.623	46.7724	337.088	274.787	507.397	10.1236	150.524
1MKT13-89 <>	56.9171	34783.3	1.45917	17.8865	8.79487	0.631412	9.08717	0.08191	2.28625	0.251591	507.513	11.1581	496.975	35.7262	448.7	195.713	507.513	11.1581	113.107
1MKT13-34 <>	320.5	94776	1.4843	17.2756	1.70826	0.656087	2.1586	0.0822041	1.31963	0.611336	509.265	6.46183	512.218	8.68344	525.395	37.436	509.265	6.46183	96.9299
1MKT13-29 <>	75.4945	32715.4	0.773223	17.348	9.56087	0.654212	9.7267	0.0823129	1.78842	0.183868	509.913	8.76807	511.068	39.0784	516.215	210.408	509.913	8.76807	98.7792
1MKT13-68 <>	110.525	28837.7	0.419722	17.9941	5.55095	0.631248	5.71579	0.0823815	1.36279	0.238425	510.322	6.68644	496.873	22.4624	435.354	123.696	510.322	6.68644	117.22
1MKT13-28 <>	20.1573	5099.1	0.562176	21.261	32.2526	0.534972	32.4484	0.0824922	3.55926	0.10969	510.981	17.485	435.104	115.323	50.9787	787.88	510.981	17.485	102.343
1MKT13-90 <>	104.128	40039.9	1.38453	18.58	5.68571	0.612846	5.74145	0.082584	0.798097	0.139006	511.528	3.92472	485.353	22.1554	363.559	128.3	511.528	3.92472	140.7
1MKT13-77 <>	318.777	98714.7	0.77532	17.0306	1.45367	0.669234	2.27734	0.0826622	1.75303	0.769772	511.994	8.62824	520.246	9.27108	556.63	31.7197	511.994	8.62824	91.981
1MKT13-96 <>	132.718	99150.7	1.45957	17.4281	3.29999	0.654906	3.89084	0.0827802	2.06123	0.529766	512.696	10.1585	511.493	15.6355	506.116	72.6236	512.696	10.1585	101.3
1MKT13-98 <>	293.149	54813.1	0.794262	17.4874	2.56039	0.652984	3.0884	0.0828181	1.72702	0.559195	512.922	8.51499	510.313	12.3885	498.621	56.4251	512.922	8.51499	102.868
1MKT13-53 <>	485.298	218275	0.310843	17.3028	1.3082	0.660277	2.75307	0.0828593	2.42239	0.879889	513.167	11.949	514.783	11.1176	521.944	28.6996	513.167	11.949	98.3185
1MKT13-62 <>	32.834	13840.6	0.830653	18.2374	21.0354	0.629316	21.3033	0.0832398	3.36787	0.158091	515.432	16.6833	495.67	83.7382	405.369	475.559	515.432	16.6833	127.151
1MKT13-72 <>	36.3377	7578.58	1.35661	17.5124	14.468	0.655563	14.8057	0.0832645	3.14414	0.212359	515.579	15.5792	511.896	59.5973	495.481	320.353	515.579	15.5792	104.056
1MKT13-58 <>	45.5337	16668.9	1.24681	19.0768	12.9907	0.60189	13.1286	0.0832764	1.89778	0.144554	515.65	9.40477	478.432	50.1285	303.75	297.169	515.65	9.40477	169.761
1MKT13-79 <>	134.422	17676.2	1.25815	17.3136	3.16688	0.664993	4.14434	0.0835032	2.67328	0.645044	516.999	13.2812	517.664	16.8085	520.578	69.5296	516.999	13.2812	99.3125
1MKT13-78 <>	41.9059	543.048	1.07814	15.0332	18.8327	0.7679	19.6991	0.083725	5.77774	0.2933	518.319	28.775	578.557	87.0935	822.781	396.469	518.319	28.775	62.996
1MKT13-60 <>	769.859	272472	0.387612	17.3161	0.645394	0.66706	1.60837	0.0837747	1.4732	0.915958	518.614	7.34096	518.923	6.53483	520.262	14.1799	518.614	7.34096	99.6834
1MKT13-76 <>	29.1156	9824.77	1.12565	19.563	23.5058	0.594108	24.2936	0.0842948	6.13664	0.252603	521.707	30.7543	473.488	92.1851	246.108	547.967	521.707	30.7543	211.983
1MKT13-61 <>	133.585	49347.2	1.17326	17.704	3.4571	0.661217	3.90513	0.0849012	1.81618	0.465076	525.311	9.16223	515.358	15.7841	471.458	76.545	525.311	9.16223	111.423
1MKT13-97 <>	68.9457	10002.9	0.843331	17.8038	8.7452	0.66513	10.5513	0.0858849	5.90344	0.559501	531.154	30.0995	517.747	42.8203	459.034	194.273	531.154	30.0995	115.711
1MKT13-49 <>	238.781	41778	1.31344	11.032	0.66418	2.99177	2.42682	0.239376	2.33416	0.96182	1383.45	29.0623	1405.53	18.4704	1439.15	12.6613	1439.15	12.6613	96.1302
1MKT13-74 <>	124.737	135966	1.0259	11.0072	1.35527	3.30605	3.29243	0.263927	3.00056	0.91135	1509.9	40.3912	1482.48	25.6726	1443.44	25.8215	1443.44	25.8215	104.604
1MKT13-15 <>	176.687	211132	1.75382	9.66741	0.633713	4.27057	2.16345	0.299429	2.06856	0.956138	1688.48	30.7278	1687.71	17.8012	1686.73	11.6947	1686.73	11.6947	100.104
1MKT13-33 <>	152.013	44167.7	2.49181	9.60293	0.373996	3.82854	3.75295	0.266646	3.73427	0.995022	1523.75	50.6771	1598.76	30.2237	1699.07	6.88925	1699.07	6.88925	89.6816
1MKT13-42 <>	253.572	280453	2.42246	9.54063	0.280139	4.50022	1.13663	0.311394	1.10157	0.969152	1747.56	16.8619	1731.01	9.44311	1711.05	5.15388	1711.05	5.15388	102.134
1MKT13-64 <>	152.639	131166	0.878298	9.53489	0.61341	4.42433	1.19979	0.305958	1.03113	0.859423	1720.79	15.5727	1716.91	9.93688	1712.16	11.282	1712.16	11.282	100.504
1MKT13-56 <>	125.732	72977.7	2.2928	9.50025	0.549164	4.54265	1.5072	0.312999	1.40359	0.931258	1755.45	21.5694	1738.82	12.5434	1718.85	10.0934	1718.85	10.0934	102.129
1MKT13-46 <>	181.124	294102	1.97184	9.48979	0.418378	4.46989	1.35653	0.307647	1.2904	0.951251	1729.12	19.5707	1725.4	11.2563	1720.88	7.68763	1720.88	7.68763	100.479
1MKT13-9 <>	211.236	205964	2.57729	9.48762	0.286811	4.51699	1.77901	0.310817	1.75574	0.986919	1744.73	26.8377	1734.1	14.7906	1721.29	5.26982	1721.29	5.26982	101.361
1MKT13-21 <>	179.229	188502	2.18844	9.48256	0.467999	4.41059	1.66758	0.303334	1.60056	0.959811	1707.82	24.0137	1714.33	13.8037	1722.28	8.5979	1722.28	8.5979	99.1607
1MKT13-59 <>	251.228	290102	2.58707	9.47124	0.403437	4.42586	4.46186	0.304021	4.44358	0.995904	1711.22	66.7861	1717.19	36.9714	1724.47	7.40973	1724.47	7.40973	99.2316
1MKT13-67 <>	223.144	219818	2.9866	9.46854	0.425596	4.51227	1.51147	0.309868	1.45031	0.959538	1740.06	22.1172	1733.24	12.5636	1724.99	7.8162	1724.99	7.8162	100.873
1MKT13-88 <>	189.359	337372	2.14423	9.38292	0.706135	4.63546	1.25279	0.315449	1.03482	0.826014	1767.47	15.9971	1755.68	10.4638	1741.66	12.9397	1741.66	12.9397	101.482
1MKT13-43 <>	183.208	134898	9.07123	9.32785	0.771856	3.90099	2.18978	0.263909	2.04924	0.935819	1509.81	27.5837	1613.89	17.6997	1752.44	14.1253	1752.44	14.1253	86.1551
1MKT13-55 <>	280.869	56889.6	1.46505	9.23456	0.319093	4.53647	2.32277	0.303832	2.30075	0.990519	1710.28	34.5623	1737.68	19.3274	1770.81	5.82684	1770.81	5.82684	96.5818
1MKT13-73 <>	82.2416	75588.5	2.61682	9.05988	0.784203	4.94694	2.31669	0.325056	2.17992	0.940966	1814.37	34.4736	1810.3	19.5701	1805.61	14.2571	1805.61	14.2571	100.486
1MKT13-6 <>	56.4389	57814.6	0.58957	8.86034	1.06753	5.20446	1.70924	0.334445	1.33487	0.780975	1859.89	21.5667	1853.35	14.5591	1846	19.3137	1846	19.3137	100.753
1MKT13-41 <>	207.128	202158	1.26149	5.74033	0.189496	11.9459	3.07678	0.49734	3.07094	0.998102	2602.36	65.7564	2600.17	28.8357	2598.45	3.1565	2598.45	3.1565	100.15
Table 11PL03. U-Pb geochronologic analyses.
							Isotope ratios						Apparent ages (Ma)
Analysis	U	206Pb	U/Th	206Pb*	±	207Pb*	±	206Pb*	±	error	206Pb*	±	207Pb*	±	206Pb*	±	Best age	±	Conc
	(ppm)	204Pb		207Pb*	(%)	235U*	(%)	238U	(%)	corr.	238U*	(Ma)	235U	(Ma)	207Pb*	(Ma)	(Ma)	(Ma)	(%)
11PL03-47	113.705	47777.2	1.31373	11.018	1.7211	3.05868	2.13554	0.244418	1.26426	0.592008	1409.63	16.0075	1422.41	16.3427	1441.57	32.8007	1441.57	32.8007	97.7839
11PL03-96	117.957	36611.9	2.0076	10.8001	1.66437	3.22535	2.02681	0.252641	1.15664	0.570673	1452.08	15.0382	1463.27	15.7106	1479.53	31.5579	1479.53	31.5579	98.145
11PL03-10	184.383	61148.5	1.82061	9.86308	1.10284	4.16525	3.29698	0.297956	3.10706	0.942396	1681.16	45.9798	1667.21	27.0021	1649.67	20.4471	1649.67	20.4471	101.909
11PL03-25	223.861	85101	3.54788	9.65937	0.750834	4.21675	2.0537	0.29541	1.91153	0.930772	1668.51	28.1009	1677.29	16.8572	1688.27	13.8534	1688.27	13.8534	98.8297
11PL03-59	335.767	56975.6	4.48417	9.63193	0.611856	4.1855	2.43962	0.292388	2.36165	0.968039	1653.45	34.4433	1671.18	19.997	1693.51	11.2799	1693.51	11.2799	97.6343
11PL03-49	119.413	68496.5	1.89311	9.62277	2.12457	4.15447	2.40482	0.289944	1.12667	0.468504	1641.25	16.3252	1665.09	19.6833	1695.27	39.1656	1695.27	39.1656	96.8138
11PL03-48	118.799	63362.9	1.93607	9.61825	0.990814	4.27144	2.35008	0.297968	2.131	0.906778	1681.22	31.5363	1687.88	19.3379	1696.13	18.2615	1696.13	18.2615	99.1209
11PL03-45	194.94	95019.7	2.07414	9.61726	0.808284	4.16009	3.48389	0.29017	3.38883	0.972714	1642.38	49.134	1666.2	28.5269	1696.32	14.8965	1696.32	14.8965	96.8199
11PL03-26	133.527	38343.3	2.43391	9.5982	1.32082	4.19278	2.40745	0.291871	2.01278	0.83606	1650.87	29.3149	1672.61	19.7399	1699.98	24.333	1699.98	24.333	97.1112
11PL03-52	99.878	38078.6	1.8257	9.58589	1.97121	4.30671	2.90672	0.299417	2.1362	0.734917	1688.42	31.7316	1694.65	23.9571	1702.34	36.3069	1702.34	36.3069	99.182
11PL03-91	140.64	53847.1	4.49307	9.57243	0.972624	4.26958	1.25785	0.296419	0.797618	0.634111	1673.53	11.7564	1687.52	10.3486	1704.93	17.9063	1704.93	17.9063	98.1581
11PL03-44	204.699	66687.7	3.67028	9.56964	0.488464	4.39492	2.5021	0.305032	2.45395	0.980759	1716.21	36.9755	1711.39	20.6995	1705.46	8.99115	1705.46	8.99115	100.63
11PL03-20	250.048	37924	3.01381	9.56308	1.0677	3.72724	1.79741	0.258514	1.44593	0.804451	1482.24	19.1466	1577.24	14.3908	1706.73	19.6524	1706.73	19.6524	86.8467
11PL03-28	140.503	35442.1	2.09469	9.5456	1.62395	4.4484	4.21116	0.307968	3.88544	0.922653	1730.7	58.9766	1721.4	34.9251	1710.09	29.8804	1710.09	29.8804	101.205
11PL03-93	83.7654	38503.5	2.00799	9.54064	1.49805	4.25626	2.77483	0.294513	2.33571	0.841748	1664.04	34.2562	1684.95	22.8187	1711.05	27.5601	1711.05	27.5601	97.2527
11PL03-21	120.851	31179.9	2.5655	9.51928	1.75129	4.39816	6.2423	0.303651	5.9916	0.959839	1709.39	89.971	1712	51.6862	1715.17	32.2015	1715.17	32.2015	99.6627
11PL03-63	310.097	104463	1.69655	9.50079	0.552895	4.48776	2.45844	0.309235	2.39546	0.974383	1736.94	36.4739	1728.71	20.4166	1718.75	10.1621	1718.75	10.1621	101.058
11PL03-62	189.475	91922.8	3.99585	9.48583	0.909095	4.46665	2.39451	0.307295	2.21523	0.925127	1727.38	33.5677	1724.8	19.8684	1721.64	16.7031	1721.64	16.7031	100.333
11PL03-31	217.423	59067.6	2.98742	9.47495	1.09117	4.34339	2.19985	0.298472	1.91016	0.868312	1683.73	28.3049	1701.64	18.1586	1723.75	20.0415	1723.75	20.0415	97.6783
11PL03-70	261.046	98488.2	5.30936	9.45011	0.982567	4.52463	3.30628	0.310112	3.1569	0.954821	1741.26	48.1723	1735.51	27.5014	1728.57	18.0356	1728.57	18.0356	100.734
11PL03-69	140.39	49358.2	1.51631	9.41041	0.878879	4.55542	2.58998	0.31091	2.4363	0.940664	1745.19	37.2491	1741.15	21.5676	1736.3	16.1165	1736.3	16.1165	100.512
11PL03-41	352.067	111228	1.53937	9.34379	0.512074	4.51387	1.89076	0.305894	1.8201	0.962627	1720.47	27.484	1733.53	15.7179	1749.31	9.37413	1749.31	9.37413	98.3514
11PL03-77	191.6	46347.6	3.22622	9.34054	1.09261	4.42144	2.99411	0.299526	2.78764	0.931039	1688.96	41.42	1716.37	24.799	1749.95	20.0023	1749.95	20.0023	96.5148
11PL03-85	149.788	76285.6	3.05069	9.31303	0.944642	4.61207	1.67325	0.31152	1.38109	0.825396	1748.18	21.1473	1751.45	13.9634	1755.34	17.2815	1755.34	17.2815	99.592
11PL03-32	252.146	77264.6	3.41188	9.2365	0.784945	4.63565	1.96567	0.310539	1.80215	0.916809	1743.36	27.5282	1755.71	16.419	1770.43	14.3327	1770.43	14.3327	98.471
11PL03-1	190.044	71778.3	2.97064	9.21951	0.988625	4.44767	2.84391	0.297399	2.66654	0.937632	1678.4	39.4037	1721.26	23.5801	1773.79	18.0449	1773.79	18.0449	94.6221
11PL03-46	495.213	264099	5.67756	9.19726	0.472096	4.68061	2.59502	0.31222	2.55172	0.983313	1751.62	39.139	1763.78	21.7142	1778.2	8.61114	1778.2	8.61114	98.5054
11PL03-87	188.075	63905.5	2.77648	9.18405	0.639958	4.69432	2.80075	0.312684	2.72666	0.973545	1753.9	41.8697	1766.23	23.4483	1780.82	11.6699	1780.82	11.6699	98.4885
11PL03-12	177.46	94046.3	2.01377	8.86997	0.929347	5.10234	2.7509	0.328239	2.58916	0.941206	1829.84	41.2475	1836.5	23.359	1844.03	16.8174	1844.03	16.8174	99.2305
11PL03-34	227.332	49889.1	4.11678	5.90049	0.318487	8.63924	4.19548	0.369711	4.18337	0.997115	2028.04	72.7941	2300.7	38.1987	2552.48	5.33108	2552.48	5.33108	79.4537
11PL03-11	51.4164	41946.9	1.38784	5.49443	0.853963	12.7711	2.5952	0.50892	2.45068	0.944311	2652.02	53.2841	2662.91	24.4424	2671.19	14.1401	2671.19	14.1401	99.2823
11PL03-74	49.0397	35547.4	1.63228	5.08874	0.718956	15.1861	1.22016	0.560473	0.985846	0.807965	2868.58	22.8259	2826.98	11.6244	2797.43	11.7666	2797.43	11.7666	102.543
11PL03-27	133.23	86803.2	1.70987	4.69417	0.345304	17.304	1.244	0.589119	1.19511	0.960703	2985.85	28.5612	2951.84	11.9418	2928.73	5.58551	2928.73	5.58551	101.95
Table 12PL03. U-Pb geochronologic analyses.
							Isotope ratios						Apparent ages (Ma)
Analysis	U	206Pb	U/Th	206Pb*	±	207Pb*	±	206Pb*	±	error	206Pb*	±	207Pb*	±	206Pb*	±	Best age	±	Conc
	(ppm)	204Pb		207Pb*	(%)	235U*	(%)	238U	(%)	corr.	238U*	(Ma)	235U	(Ma)	207Pb*	(Ma)	(Ma)	(Ma)	(%)
12PL03-84	508.255	110440	4.96549	17.0707	1.80348	0.750492	2.10313	0.0929174	1.08195	0.514445	572.768	5.92971	568.51	9.15575	551.52	39.3887	572.768	5.92971	103.853
12PL03-100	41.4424	25857.5	1.33218	11.7136	4.99475	2.75937	5.07337	0.234422	0.889686	0.175364	1357.64	10.8916	1344.62	37.8287	1323.96	96.7987	1323.96	96.7987	102.543
12PL03-37	135.181	60747.3	3.25904	11.6141	1.70683	2.78893	3.17726	0.23492	2.67987	0.843454	1360.23	32.8637	1352.57	23.751	1340.47	32.985	1340.47	32.985	101.475
12PL03-44	99.1094	56333	1.49066	11.5982	2.31643	2.76813	3.40123	0.23285	2.49048	0.732231	1349.42	30.323	1346.98	25.3756	1343.1	44.7517	1343.1	44.7517	100.47
12PL03-55	153.6	70975.5	1.10316	11.5899	1.62568	2.76996	2.87568	0.232838	2.37207	0.824872	1349.36	28.88	1347.48	21.4572	1344.49	31.3988	1344.49	31.3988	100.362
12PL03-48	20.0513	9611.07	1.80026	11.5841	5.52393	2.79457	5.79472	0.234788	1.75072	0.302124	1359.55	21.4596	1354.09	43.359	1345.46	106.736	1345.46	106.736	101.047
12PL03-98	91.4962	44636.8	1.92846	11.5466	1.75933	2.87814	2.35244	0.241027	1.56165	0.663843	1392.03	19.5519	1376.21	17.7289	1351.72	33.9467	1351.72	33.9467	102.983
12PL03-33	139.031	62203.3	3.25294	11.5354	2.48513	2.95397	4.63294	0.247136	3.91002	0.843962	1423.69	49.9492	1395.87	35.1587	1353.59	47.9407	1353.59	47.9407	105.179
12PL03-47	26.1025	13952.1	1.77287	11.4853	6.76995	2.8006	6.85446	0.233288	1.07309	0.156553	1351.71	13.0852	1355.7	51.3301	1361.98	130.558	1361.98	130.558	99.2457
12PL03-4	123.656	28799.9	2.67006	11.4744	2.55287	2.52379	5.99126	0.210031	5.42016	0.904677	1228.98	60.6499	1278.91	43.5972	1363.8	49.1785	1363.8	49.1785	90.1145
12PL03-60a	119.654	62743.8	3.65518	11.4598	1.98539	2.82486	6.01432	0.234787	5.67717	0.943942	1359.54	69.5904	1362.16	45.1319	1366.25	38.2317	1366.25	38.2317	99.5088
12PL03-20	65.8909	28239.1	2.23148	11.4499	3.08514	2.9663	3.95304	0.246329	2.47153	0.625223	1419.52	31.4899	1399.03	30.0274	1367.92	59.4029	1367.92	59.4029	103.772
12PL03-16	72.6543	50175.7	1.76907	11.4227	2.18641	2.94257	3.02865	0.243778	2.09579	0.691987	1406.31	26.4801	1392.93	22.9562	1372.5	42.0659	1372.5	42.0659	102.464
12PL03-60	134.848	78111.8	2.80665	11.3893	1.24809	2.93183	2.04844	0.242177	1.62431	0.792947	1398	20.4144	1390.16	15.5107	1378.14	23.9926	1378.14	23.9926	101.441
12PL03-87	135.88	74613.2	3.51035	11.341	1.61574	2.90682	3.25335	0.239094	2.82377	0.867958	1381.98	35.125	1383.69	24.5833	1386.29	31.0258	1386.29	31.0258	99.6893
12PL03-46	226.807	75522.7	1.82252	11.1606	1.17795	3.05165	2.43362	0.247014	2.12954	0.875051	1423.06	27.193	1420.65	18.6138	1417.01	22.5232	1417.01	22.5232	100.427
12PL03-31	141.317	68971.2	1.36356	11.1549	1.3386	3.07173	1.58635	0.248512	0.851266	0.53662	1430.8	10.9229	1425.67	12.1522	1417.99	25.5919	1417.99	25.5919	100.903
12PL03-35	151.414	93459.6	2.50155	11.107	1.11553	3.10618	2.25694	0.25022	1.96198	0.869311	1439.61	25.3135	1434.22	17.3373	1426.22	21.303	1426.22	21.303	100.939
12PL03-29	190.068	176041	2.03995	11.0938	0.779411	3.11888	2.85731	0.250946	2.74895	0.962077	1443.35	35.5493	1437.36	21.9722	1428.48	14.8795	1428.48	14.8795	101.041
12PL03-90	169.632	100674	1.78707	11.0205	1.23583	3.12427	2.91905	0.249718	2.64454	0.905958	1437.02	34.0651	1438.69	22.4566	1441.13	23.5531	1441.13	23.5531	99.715
12PL03-62	141.563	108197	1.08233	10.9956	1.22739	3.10868	2.05903	0.24791	1.65322	0.80291	1427.69	21.1719	1434.84	15.8198	1445.45	23.3785	1445.45	23.3785	98.7713
12PL03-38	51.6069	23756.7	1.75737	10.9687	4.05351	2.95043	4.57917	0.234714	2.13022	0.465199	1359.16	26.1047	1394.96	34.7398	1450.11	77.1866	1450.11	77.1866	93.7281
12PL03-99	173.444	91833.8	2.24926	10.9677	0.890046	3.24497	2.19568	0.258123	2.0072	0.914156	1480.23	26.5469	1467.98	17.0442	1450.27	16.9417	1450.27	16.9417	102.066
12PL03-79	212.6	135262	1.71527	10.9613	0.836549	3.21231	2.32092	0.255375	2.16491	0.932783	1466.14	28.39	1460.13	17.9735	1451.39	15.9209	1451.39	15.9209	101.016
12PL03-61	164.171	127930	1.65826	10.9443	1.81626	3.19958	2.95638	0.253969	2.33268	0.789031	1458.91	30.4559	1457.06	22.8745	1454.34	34.555	1454.34	34.555	100.315
12PL03-36	89.7225	80858.5	0.844375	10.9288	1.67068	3.15402	2.13631	0.249996	1.33141	0.623228	1438.46	17.1655	1445.98	16.4713	1457.05	31.7733	1457.05	31.7733	98.7242
12PL03-95	215.639	75315.7	1.85893	10.9247	0.873456	3.16378	1.94305	0.250676	1.73566	0.893266	1441.96	22.426	1448.37	14.9921	1457.76	16.6091	1457.76	16.6091	98.916
12PL03-74	217.861	92759.9	0.948027	10.9058	1.13693	3.02011	2.94165	0.23888	2.71306	0.922292	1380.87	33.7234	1412.71	22.4428	1461.04	21.61	1461.04	21.61	94.5128
12PL03-82	72.8246	34219.1	2.04022	10.8899	1.72429	3.34198	3.12475	0.263951	2.60593	0.833965	1510.03	35.0816	1490.92	24.4256	1463.83	32.7632	1463.83	32.7632	103.156
12PL03-70	187.538	46017.5	1.33614	10.8715	1.33185	3.2334	3.94312	0.254946	3.71138	0.94123	1463.93	48.6054	1465.2	30.5894	1467.03	25.2948	1467.03	25.2948	99.789
12PL03-6	56.5685	41417.1	4.90962	9.90357	2.0819	4.19145	2.97312	0.301061	2.12253	0.713907	1696.57	31.6616	1672.35	24.3782	1642.07	38.64	1642.07	38.64	103.319
12PL03-22	173.576	100917	3.73002	9.87994	0.911455	4.04568	1.97252	0.289898	1.74931	0.886841	1641.02	25.3441	1643.43	16.0605	1646.5	16.9052	1646.5	16.9052	99.6669
12PL03-64	53.9415	37379.9	2.21285	9.81957	3.69468	4.12673	4.1663	0.293898	1.92547	0.462152	1660.98	28.1938	1659.61	34.0651	1657.86	68.4516	1657.86	68.4516	100.188
12PL03-59	46.4634	33558.3	4.92449	9.81758	2.43432	4.18613	2.69323	0.298069	1.15221	0.427816	1681.72	17.0556	1671.31	22.0771	1658.24	45.088	1658.24	45.088	101.416
12PL03-26	78.0756	57625.7	1.85675	9.79456	1.97786	4.33052	2.58681	0.307627	1.66723	0.644512	1729.02	25.2846	1699.19	21.3417	1662.59	36.6138	1662.59	36.6138	103.996
12PL03-34	95.278	17780.6	2.78206	9.73677	2.59541	4.05297	2.76238	0.286212	0.945839	0.3424	1622.57	13.5679	1644.9	22.5015	1673.53	47.981	1673.53	47.981	96.9551
12PL03-43	182.52	113354	4.08863	9.72576	0.870303	4.34608	2.99573	0.306563	2.86652	0.95687	1723.77	43.358	1702.15	24.7332	1675.62	16.0819	1675.62	16.0819	102.874
12PL03-45	299.673	199385	3.34415	9.72092	0.351395	4.34245	2.86538	0.306155	2.84376	0.992452	1721.76	42.9698	1701.46	23.653	1676.54	6.4931	1676.54	6.4931	102.697
12PL03-32	154.24	87887.5	2.79717	9.71037	0.540795	4.34571	2.58801	0.306052	2.53088	0.977924	1721.25	38.2322	1702.08	21.3656	1678.54	9.99033	1678.54	9.99033	102.544
12PL03-40	160.399	82210.5	2.25863	9.69757	0.872094	4.09499	1.65398	0.288014	1.40538	0.849698	1631.6	20.2585	1653.3	13.4988	1680.98	16.1058	1680.98	16.1058	97.0623
12PL03-39	107.948	64761.9	2.03901	9.69355	0.789757	4.1292	2.08632	0.2903	1.93107	0.925585	1643.03	28.0075	1660.1	17.0556	1681.75	14.5837	1681.75	14.5837	97.6978
12PL03-42	164.755	87008.4	5.84347	9.68297	0.985633	4.28324	2.62311	0.300801	2.43089	0.926721	1695.28	36.2374	1690.14	21.5965	1683.76	18.1962	1683.76	18.1962	100.684
12PL03-72	57.7878	101872	2.8019	9.65611	3.6781	4.24371	3.8565	0.297198	1.15938	0.300631	1677.4	17.1232	1682.52	31.7009	1688.89	67.8756	1688.89	67.8756	99.3198
12PL03-57	198.563	63895.9	4.39218	9.64571	0.911169	4.28886	2.00964	0.300037	1.79121	0.891308	1691.49	26.6493	1691.23	16.5488	1690.88	16.8046	1690.88	16.8046	100.036
12PL03-41	145.095	25812.4	4.4762	9.63491	1.63675	4.09494	2.159	0.28615	1.40796	0.652133	1622.26	20.1935	1653.3	17.6212	1692.94	30.1796	1692.94	30.1796	95.825
12PL03-78	85.2481	68691.8	2.27546	9.63361	1.58952	4.47143	2.28664	0.312417	1.64383	0.718882	1752.59	25.2255	1725.68	18.9769	1693.19	29.3093	1693.19	29.3093	103.508
12PL03-28	223.694	86384.6	2.6517	9.62734	0.666901	4.34673	3.42414	0.303506	3.35857	0.98085	1708.67	50.4122	1702.27	28.2728	1694.39	12.2935	1694.39	12.2935	100.843
12PL03-15	54.1189	39599.2	2.15403	9.62311	2.51466	4.27652	3.65724	0.298473	2.65554	0.726105	1683.73	39.3504	1688.85	30.1061	1695.2	46.3582	1695.2	46.3582	99.3234
12PL03-14	83.5065	31174.2	2.47069	9.62261	1.31779	4.32598	2.58725	0.301909	2.2265	0.860566	1700.77	33.2844	1698.33	21.3411	1695.3	24.2916	1695.3	24.2916	100.323
12PL03-19	38.1326	27448.1	3.30785	9.61281	3.4974	4.22944	3.91165	0.294871	1.75191	0.447869	1665.82	25.718	1679.75	32.1338	1697.18	64.4709	1697.18	64.4709	98.1526
12PL03-80	132.825	86616.9	4.20197	9.59933	1.53473	4.50792	2.57904	0.313846	2.07268	0.803666	1759.6	31.9173	1732.43	21.4358	1699.76	28.2754	1699.76	28.2754	103.52
12PL03-52	139.04	34863.6	3.5097	9.59576	1.40327	4.46216	2.59998	0.310544	2.18877	0.841842	1743.38	33.4345	1723.96	21.5698	1700.45	25.8508	1700.45	25.8508	102.525
12PL03-75	87.7173	46560.4	2.40189	9.59129	1.14834	4.09091	2.33459	0.284574	2.03264	0.870663	1614.36	29.0281	1652.49	19.0509	1701.31	21.1514	1701.31	21.1514	94.8893
12PL03-23	111.93	84256.5	2.98844	9.5806	1.43774	4.37373	3.1703	0.303909	2.82555	0.891255	1710.66	42.4544	1707.39	26.2061	1703.36	26.4761	1703.36	26.4761	100.429
12PL03-25	85.7475	58591.1	2.58919	9.58043	2.06835	4.43067	3.36121	0.30786	2.64946	0.788247	1730.17	40.2043	1718.09	27.8516	1703.39	38.0915	1703.39	38.0915	101.572
12PL03-17	100.182	79320.3	2.3631	9.57042	0.929615	4.38497	1.95529	0.304366	1.72017	0.87975	1712.92	25.8755	1709.51	16.1682	1705.31	17.1135	1705.31	17.1135	100.446
12PL03-2	161.157	81894.7	3.08069	9.55761	0.844986	4.40629	1.98373	0.305437	1.79477	0.904743	1718.21	27.0703	1713.52	16.4181	1707.78	15.5505	1707.78	15.5505	100.611
12PL03-86	146.829	96873.6	2.51121	9.55178	1.17396	4.43489	3.5239	0.307232	3.3226	0.942877	1727.07	50.3406	1718.88	29.2055	1708.9	21.6027	1708.9	21.6027	101.063
12PL03-13	126.474	119058	1.40602	9.55174	0.818215	4.42719	2.11661	0.306697	1.95207	0.922261	1724.43	29.5359	1717.44	17.5334	1708.91	15.0557	1708.91	15.0557	100.908
12PL03-97	251.782	51200.7	3.84292	9.55166	0.877181	3.45757	1.01284	0.239524	0.506357	0.499938	1384.22	6.30768	1517.6	7.97724	1708.93	16.1408	1708.93	16.1408	80.9995
12PL03-77	76.79	43417.9	3.38214	9.55026	1.40999	4.41283	2.22388	0.305654	1.71975	0.773313	1719.29	25.9531	1714.75	18.4112	1709.2	25.9459	1709.2	25.9459	100.59
12PL03-67	70.8701	42091.1	3.36869	9.54473	1.74559	4.44388	2.5912	0.307627	1.915	0.739041	1729.02	29.0423	1720.56	21.4808	1710.26	32.1165	1710.26	32.1165	101.097
12PL03-91	145.144	97449.1	3.65456	9.54011	0.87738	4.38778	1.82879	0.303597	1.60458	0.877399	1709.12	24.0899	1710.04	15.1238	1711.15	16.1399	1711.15	16.1399	99.8813
12PL03-54	178.834	101462	3.18032	9.52953	0.744851	4.3834	1.75894	0.302957	1.59344	0.905912	1705.95	23.884	1709.21	14.5434	1713.19	13.6981	1713.19	13.6981	99.5775
12PL03-24	74.1811	67819	4.54859	9.5205	1.76064	4.46344	2.6445	0.308197	1.9732	0.746152	1731.83	29.9672	1724.2	21.9404	1714.94	32.3745	1714.94	32.3745	100.985
12PL03-8	164.187	56103.3	3.11593	9.52027	0.830528	4.08897	2.40635	0.282333	2.25848	0.938551	1603.1	32.0552	1652.1	19.6348	1714.98	15.2706	1714.98	15.2706	93.4763
12PL03-69	248.805	135973	2.19352	9.51991	0.530277	4.529	2.1066	0.312704	2.03876	0.9678	1754	31.308	1736.31	17.5231	1715.05	9.75094	1715.05	9.75094	102.271
12PL03-1	143.405	60224	2.92387	9.5127	1.06721	4.16384	3.04854	0.287274	2.85564	0.936723	1627.89	41.0821	1666.93	24.965	1716.44	19.6194	1716.44	19.6194	94.841
12PL03-63	155.872	94335.3	2.39004	9.50904	0.883514	4.54487	1.799	0.313442	1.5671	0.871095	1757.62	24.108	1739.22	14.9734	1717.15	16.2405	1717.15	16.2405	102.357
12PL03-12	384.222	129163	3.90538	9.50296	0.473713	4.27268	2.17345	0.294482	2.12119	0.975959	1663.89	31.1075	1688.11	17.8851	1718.33	8.7072	1718.33	8.7072	96.8319
12PL03-27	82.67	64654.9	4.43166	9.48115	1.89639	4.65241	2.56974	0.319917	1.73414	0.674831	1789.33	27.0954	1758.73	21.4797	1722.55	34.8381	1722.55	34.8381	103.877
12PL03-76	214.943	93008.2	4.0267	9.48015	0.868273	4.01687	3.70044	0.276186	3.59713	0.972082	1572.13	50.1847	1637.62	30.093	1722.74	15.9508	1722.74	15.9508	91.2572
12PL03-73	160.689	146290	2.14	9.47982	0.873135	4.59521	2.64755	0.31594	2.49943	0.944054	1769.87	38.684	1748.4	22.0816	1722.81	16.04	1722.81	16.04	102.732
12PL03-88	79.6053	63552.4	2.95215	9.47384	1.4618	4.44515	2.8162	0.30543	2.4071	0.854734	1718.18	36.3058	1720.8	23.3479	1723.97	26.8477	1723.97	26.8477	99.6643
12PL03-50	282.044	150140	2.15809	9.4698	0.53527	4.59729	3.64601	0.315749	3.6065	0.989165	1768.93	55.7935	1748.78	30.416	1724.75	9.83072	1724.75	9.83072	102.562
12PL03-30	139.067	127731	3.89152	9.46552	1.1274	4.55528	1.70296	0.312722	1.27634	0.749484	1754.09	19.6007	1741.13	14.1798	1725.58	20.7023	1725.58	20.7023	101.652
12PL03-85	43.2296	25747.8	2.78057	9.4547	2.33655	4.34957	3.69155	0.298258	2.85799	0.774197	1682.67	42.3269	1702.81	30.4857	1727.68	42.8992	1727.68	42.8992	97.3946
12PL03-89	117.603	21443.2	4.4667	9.45116	1.9613	4.16514	2.47167	0.285505	1.50415	0.608555	1619.03	21.5353	1667.19	20.2407	1728.37	36.0045	1728.37	36.0045	93.6738
12PL03-7	139.592	25903.2	2.59903	9.42027	0.682932	4.29824	1.64406	0.293666	1.49551	0.909642	1659.82	21.8846	1693.02	13.5436	1734.37	12.5258	1734.37	12.5258	95.7015
12PL03-92	120.47	63158.8	2.9771	9.38611	1.19948	4.55367	2.61036	0.309989	2.31845	0.888174	1740.65	35.3671	1740.83	21.7359	1741.03	21.9836	1741.03	21.9836	99.9781
12PL03-96	164.907	95637.7	3.77233	9.37387	1.17961	4.56473	2.21642	0.310336	1.87644	0.846609	1742.36	28.6488	1742.85	18.463	1743.42	21.6129	1743.42	21.6129	99.939
12PL03-56	179.278	109206	3.39287	9.36878	1.03489	4.62192	3.03168	0.314054	2.84958	0.939933	1760.62	43.9033	1753.24	25.3129	1744.42	18.9586	1744.42	18.9586	100.929
12PL03-3	112.665	67064.2	3.41324	9.36517	1.22279	4.39538	1.6019	0.298546	1.03482	0.645998	1684.09	15.337	1711.47	13.2515	1745.12	22.3995	1745.12	22.3995	96.5027
12PL03-9	227.274	119861	2.47902	9.34755	0.653079	4.48207	2.77196	0.303861	2.69393	0.97185	1710.43	40.472	1727.66	23.0158	1748.57	11.957	1748.57	11.957	97.8184
12PL03-53	308.181	24525.1	2.43591	9.34581	0.60839	4.12998	5.16438	0.27994	5.12842	0.993037	1591.06	72.3094	1660.26	42.2407	1748.91	11.1382	1748.91	11.1382	90.9741
12PL03-58	306.886	187983	3.25357	9.31855	0.670972	4.62436	2.54469	0.312535	2.45463	0.964611	1753.17	37.6788	1753.68	21.2474	1754.26	12.2778	1754.26	12.2778	99.9378
12PL03-21	33.3411	22830.4	3.51519	9.15571	4.3754	4.43421	6.25456	0.294447	4.46939	0.714581	1663.71	65.5397	1718.75	51.8662	1786.45	79.7753	1786.45	79.7753	93.1294
12PL03-83	351.577	27641.3	3.55292	9.14476	1.89106	4.00701	4.861	0.265761	4.47808	0.921226	1519.25	60.6125	1635.62	39.5199	1788.63	34.4556	1788.63	34.4556	84.9392
12PL03-18	89.3476	74124.9	2.63705	9.13573	1.57281	4.90752	2.46048	0.325165	1.89215	0.769015	1814.9	29.9302	1803.55	20.7571	1790.43	28.6492	1790.43	28.6492	101.367
Table 151PL02. U-Pb geochronologic analyses.
							Isotope ratios						Apparent ages (Ma)
Analysis	U	206Pb	U/Th	206Pb*	±	207Pb*	±	206Pb*	±	error	206Pb*	±	207Pb*	±	206Pb*	±	Best age	±	Conc
	(ppm)	204Pb		207Pb*	(%)	235U*	(%)	238U	(%)	corr.	238U*	(Ma)	235U	(Ma)	207Pb*	(Ma)	(Ma)	(Ma)	(%)
151PL02-95	339.507	4981.85	0.772115	16.4794	4.42773	0.58368	10.4335	0.0697615	9.44737	0.905486	434.719	39.7158	466.824	39.0644	627.95	95.4479	434.719	39.7158	69.2283
151PL02-9	77.6115	9389.85	1.73163	17.1104	18.6848	0.591054	18.7704	0.0733475	1.79139	0.0954367	456.292	7.89139	471.54	70.9173	546.429	411.488	456.292	7.89139	83.5042
151PL02-87	325.393	55347.2	1.23839	17.7265	2.72328	0.603316	2.80352	0.0775652	0.665968	0.237547	481.573	3.09026	479.336	10.7121	468.648	60.3251	481.573	3.09026	102.758
151PL02-27	178.17	63055.2	0.931669	17.3989	5.88522	0.620687	6.14073	0.0783239	1.75293	0.28546	486.11	8.20784	490.278	23.8838	509.819	129.502	486.11	8.20784	95.3496
151PL02-3	132.942	23287	1.80584	15.9707	10.4696	0.67865	11.0181	0.0786084	3.43297	0.311577	487.811	16.1285	525.958	45.2593	695.157	223.689	487.811	16.1285	70.1727
151PL02-33	44.3992	7668.42	1.63738	17.4233	19.2535	0.624435	19.2815	0.0789071	1.03966	0.0539199	489.596	4.90163	492.623	75.3968	506.717	427.07	489.596	4.90163	96.6211
151PL02-7	115.988	24482.8	1.78378	17.4636	9.31535	0.625677	9.99024	0.0792471	3.60961	0.361314	491.627	17.0861	493.399	39.0603	501.64	205.475	491.627	17.0861	98.004
151PL02-51	38.9526	7787.35	0.520189	15.1717	21.2764	0.720534	21.3168	0.0792842	1.31111	0.061506	491.849	6.20881	550.982	90.8867	803.571	450.337	491.849	6.20881	61.2079
151PL02-100	159.033	13373.5	1.3786	17.4287	7.10694	0.628284	7.49734	0.0794182	2.38778	0.318483	492.649	11.3251	495.027	29.3822	506.042	156.5	492.649	11.3251	97.3534
151PL02-18	75.8945	12953.5	1.79422	16.9141	7.88893	0.648887	8.09368	0.0796005	1.809	0.223508	493.738	8.59826	507.793	32.352	571.624	171.861	493.738	8.59826	86.3745
151PL02-2	106.515	19490.3	0.593487	17.0828	6.85722	0.64361	6.94976	0.0797409	1.1303	0.162639	494.576	5.38116	504.539	27.6395	549.947	149.902	494.576	5.38116	89.9317
151PL02-29	149.56	4425.15	1.19897	15.4108	12.6436	0.718734	12.7626	0.0803324	1.73838	0.136209	498.107	8.33292	549.919	54.2427	770.744	267.177	498.107	8.33292	64.6268
151PL02-77	1256.93	23119.1	1.53437	17.1746	1.14117	0.665295	1.67097	0.0828703	1.2206	0.730475	513.233	6.02163	517.848	6.7784	538.246	24.9613	513.233	6.02163	95.3528
151PL02-39	691.294	115453	1.2239	17.1767	1.2754	0.677566	2.25533	0.0844091	1.86007	0.824744	522.387	9.33348	525.302	9.24962	538.001	27.9207	522.387	9.33348	97.0978
151PL02-43	113.91	83683.6	1.29823	11.0434	1.52662	3.22353	2.15115	0.258186	1.51554	0.704528	1480.55	20.0482	1462.83	16.6723	1437.18	29.1111	1437.18	29.1111	103.018
151PL02-88	184.232	120527	1.10454	10.9959	1.59225	3.17726	2.64941	0.253385	2.11757	0.799263	1455.91	27.5966	1451.65	20.4644	1445.39	30.329	1445.39	30.329	100.728
151PL02-55	154.06	70776.9	1.90585	10.9087	1.96138	3.33544	2.14565	0.263891	0.869952	0.405449	1509.72	11.7092	1489.39	16.7629	1460.54	37.2852	1460.54	37.2852	103.367
151PL02-37	206.362	120357	1.715	10.8808	0.534714	3.33073	1.92638	0.262844	1.85068	0.960704	1504.38	24.8314	1488.28	15.0447	1465.41	10.1572	1465.41	10.1572	102.659
151PL02-53	507.309	84165.7	1.45243	10.634	0.435207	3.55949	1.88916	0.274526	1.83835	0.973103	1563.73	25.526	1540.55	14.9762	1508.86	8.2191	1508.86	8.2191	103.637
151PL02-97	123.692	75087.8	0.735048	10.0728	1.73125	3.89974	2.27222	0.284894	1.47165	0.64767	1615.96	21.0349	1613.63	18.365	1610.57	32.2627	1610.57	32.2627	100.335
151PL02-12	333.727	182585	1.97314	9.95147	0.374083	4.0133	1.36574	0.289659	1.31351	0.961757	1639.83	19.018	1636.89	11.1018	1633.11	6.95084	1633.11	6.95084	100.411
151PL02-65	270.203	404298	0.834607	9.78073	0.761543	4.26235	1.52997	0.302356	1.32698	0.867321	1702.98	19.8597	1686.12	12.5836	1665.2	14.0906	1665.2	14.0906	102.269
151PL02-1	413.4	119068	1.76934	9.71757	0.628675	4.09354	1.60633	0.288506	1.4782	0.920232	1634.06	21.3364	1653.02	13.109	1677.18	11.6158	1677.18	11.6158	97.4294
151PL02-15	97.2831	74480.1	1.40766	9.63196	1.25786	4.31007	2.35158	0.301091	1.98689	0.844916	1696.71	29.6404	1695.29	19.3833	1693.51	23.1919	1693.51	23.1919	100.189
151PL02-90	455.138	21894.9	4.31707	9.61897	0.802915	4.03667	1.59526	0.281611	1.37847	0.864103	1599.47	19.5258	1641.62	12.9827	1696	14.7982	1696	14.7982	94.3087
151PL02-61	59.7787	10628.7	1.38816	9.61536	4.56719	4.54143	5.69583	0.316706	3.40342	0.597528	1773.62	52.7729	1738.59	47.4322	1696.69	84.2132	1696.69	84.2132	104.534
151PL02-21	153.673	87096.8	1.44116	9.61041	0.853461	4.46658	0.951427	0.311326	0.420496	0.441964	1747.23	6.43555	1724.78	7.89357	1697.64	15.7266	1697.64	15.7266	102.921
151PL02-25	161.131	110748	1.27217	9.6076	0.99931	4.54491	2.6093	0.316693	2.41036	0.923757	1773.56	37.3731	1739.23	21.7195	1698.18	18.4134	1698.18	18.4134	104.439
151PL02-70	123.629	72470.4	1.43494	9.58171	1.41016	4.39409	1.88163	0.305359	1.24578	0.662076	1717.83	18.7863	1711.23	15.565	1703.15	25.9688	1703.15	25.9688	100.862
151PL02-6	225.393	104264	2.38621	9.57507	0.50872	4.36996	1.28229	0.303472	1.17706	0.917936	1708.5	17.6658	1706.68	10.5959	1704.42	9.3653	1704.42	9.3653	100.24
151PL02-85	179.111	94814.7	2.16329	9.5722	0.947117	4.3108	1.48917	0.299273	1.14917	0.771686	1687.7	17.0636	1695.43	12.2742	1704.97	17.4365	1704.97	17.4365	98.9872
151PL02-75	403.605	197877	4.44737	9.55881	0.371106	4.45069	0.841279	0.308553	0.755004	0.897448	1733.58	11.4764	1721.83	6.97513	1707.55	6.82872	1707.55	6.82872	101.525
151PL02-20	261.741	151544	2.04966	9.55341	0.554248	4.58055	1.46398	0.317376	1.35501	0.925565	1776.9	21.0439	1745.73	12.2019	1708.59	10.1983	1708.59	10.1983	103.998
151PL02-48	97.4367	76082.7	1.23171	9.55092	1.93692	4.62166	2.47647	0.320141	1.54312	0.623115	1790.42	24.1236	1753.19	20.6755	1709.07	35.6432	1709.07	35.6432	104.76
151PL02-23	228.433	110630	2.56999	9.53158	0.454431	4.52297	2.27642	0.312671	2.2306	0.979872	1753.84	34.2512	1735.2	18.9315	1712.8	8.35861	1712.8	8.35861	102.396
151PL02-91	201.242	162533	3.19988	9.5194	0.990369	4.49598	1.28092	0.310407	0.812364	0.634202	1742.71	12.405	1730.23	10.6402	1715.15	18.2096	1715.15	18.2096	101.607
151PL02-93	143.966	83897.2	2.08631	9.5139	0.472928	4.54059	2.53974	0.313307	2.49532	0.98251	1756.96	38.3755	1738.44	21.1368	1716.21	8.69509	1716.21	8.69509	102.374
151PL02-82	291.304	126143	3.74632	9.5134	0.429072	4.4477	1.63258	0.306881	1.57519	0.964845	1725.34	23.8444	1721.27	13.5348	1716.31	7.88866	1716.31	7.88866	100.526
151PL02-96	191.322	100373	2.37131	9.51236	0.755693	4.47266	1.58972	0.308569	1.39863	0.879791	1733.66	21.2607	1725.91	13.193	1716.51	13.8918	1716.51	13.8918	100.999
151PL02-84	125.699	148482	1.5271	9.51131	1.07188	4.48611	2.89209	0.309463	2.68612	0.928782	1738.06	40.9228	1728.4	24.0175	1716.71	19.7047	1716.71	19.7047	101.244
151PL02-38	144.586	80735.4	2.04431	9.50109	0.987978	4.44075	1.20073	0.306005	0.682394	0.568314	1721.02	10.3071	1719.97	9.95149	1718.69	18.1575	1718.69	18.1575	100.135
151PL02-36	275.777	130193	1.26923	9.49544	0.835737	4.49986	1.26042	0.309894	0.943508	0.748565	1740.18	14.3894	1730.95	10.4715	1719.78	15.3588	1719.78	15.3588	101.186
151PL02-16	184.188	99857.6	2.2153	9.49038	0.841448	4.46932	2.12985	0.307626	1.95658	0.918649	1729.02	29.6729	1725.29	17.6738	1720.76	15.4619	1720.76	15.4619	100.48
151PL02-42	143.084	78898.5	2.21698	9.48731	1.04152	4.53626	2.15171	0.312133	1.88284	0.875043	1751.2	28.8732	1737.64	17.9036	1721.36	19.1353	1721.36	19.1353	101.733
151PL02-5	170.268	41600.7	2.54708	9.48576	0.889055	4.57346	1.61377	0.314641	1.34678	0.834558	1763.51	20.779	1744.44	13.4467	1721.66	16.3349	1721.66	16.3349	102.431
151PL02-72	371.378	195287	2.18953	9.4836	0.405401	4.66108	3.11495	0.320596	3.08846	0.991495	1792.64	48.3344	1760.28	26.0474	1722.07	7.44805	1722.07	7.44805	104.098
151PL02-56	144.829	97878.5	2.41588	9.4825	1.0915	4.5564	1.40306	0.31336	0.881593	0.628335	1757.22	13.5596	1741.33	11.683	1722.29	20.0496	1722.29	20.0496	102.028
151PL02-19	252.222	41768.8	2.16957	9.48103	0.436702	4.02612	0.76033	0.276847	0.62241	0.818604	1575.47	8.69954	1639.49	6.18431	1722.57	8.0226	1722.57	8.0226	91.46
151PL02-47	169.529	411327	1.21955	9.46823	0.980627	4.55562	1.86522	0.312835	1.58664	0.850643	1754.64	24.3727	1741.19	15.5313	1725.05	18.008	1725.05	18.008	101.715
151PL02-46	127.771	82601	1.50799	9.46138	1.38058	4.48841	2.12642	0.307997	1.6173	0.760575	1730.84	24.55	1728.83	17.6591	1726.38	25.348	1726.38	25.348	100.258
151PL02-34	309.452	228300	1.19934	9.45425	0.471659	4.55612	0.864327	0.312407	0.724292	0.837984	1752.54	11.1144	1741.28	7.19679	1727.77	8.65914	1727.77	8.65914	101.434
151PL02-64	174.082	120991	1.37979	9.4512	0.48919	4.72565	1.16318	0.323927	1.05531	0.907263	1808.88	16.6449	1771.8	9.74822	1728.36	8.98033	1728.36	8.98033	104.659
151PL02-74	237.429	179724	2.92494	9.45116	0.913491	4.71907	3.16263	0.323475	3.02784	0.957378	1806.68	47.7071	1770.63	26.5038	1728.37	16.7679	1728.37	16.7679	104.531
151PL02-13	135.772	96542.3	1.84149	9.44623	1.16706	4.47698	2.00309	0.30672	1.62799	0.81274	1724.55	24.6339	1726.71	16.627	1729.32	21.4206	1729.32	21.4206	99.7236
151PL02-79	317.171	158375	3.4058	9.43309	0.479848	4.39343	1.47597	0.300577	1.3958	0.945678	1694.17	20.7951	1711.1	12.2087	1731.88	8.80494	1731.88	8.80494	97.8227
151PL02-26	194.39	179363	1.22231	9.43296	0.677444	4.60621	1.73411	0.315131	1.59632	0.920536	1765.91	24.6582	1750.39	14.4681	1731.91	12.429	1731.91	12.429	101.963
151PL02-45	230.518	190399	4.33378	9.4232	0.687214	4.66411	1.3136	0.318761	1.1195	0.852238	1783.68	17.4438	1760.83	10.9836	1733.8	12.6053	1733.8	12.6053	102.877
151PL02-44	150.897	93474.2	1.53408	9.41888	0.894919	4.53939	1.95746	0.310096	1.74091	0.889373	1741.18	26.5638	1738.22	16.2891	1734.64	16.4141	1734.64	16.4141	100.377
151PL02-14	54.7008	31421.7	1.55582	9.38851	3.46873	4.45783	4.07833	0.303542	2.14492	0.525931	1708.85	32.1978	1723.16	33.8358	1740.57	63.5943	1740.57	63.5943	98.1778
151PL02-57	194.587	74311.4	0.895516	9.38568	0.694894	4.77678	1.46599	0.325162	1.29083	0.880519	1814.89	20.4183	1780.83	12.3092	1741.12	12.7345	1741.12	12.7345	104.237
151PL02-83	121.535	59438.4	0.844991	9.3524	1.89035	4.58997	2.36805	0.311338	1.42627	0.602298	1747.29	21.8293	1747.45	19.7458	1747.62	34.6181	1747.62	34.6181	99.9806
151PL02-50	211.129	87627.6	1.51542	9.31889	0.676643	4.7887	1.98317	0.323653	1.86416	0.939993	1807.55	29.384	1782.92	16.6596	1754.2	12.3799	1754.2	12.3799	103.041
151PL02-71	222.206	25046	1.40805	9.29631	0.82793	4.6781	1.70804	0.315412	1.49397	0.874667	1767.29	23.0929	1763.33	14.2897	1758.63	15.1417	1758.63	15.1417	100.492
151PL02-86	377.721	20716.5	2.1658	9.2939	0.549704	3.92678	0.933358	0.264687	0.75431	0.808168	1513.78	10.177	1619.22	7.5537	1759.11	10.0526	1759.11	10.0526	86.0538
151PL02-80	85.2947	55832.3	4.19469	9.28189	1.07094	4.63794	1.95036	0.31222	1.63003	0.835759	1751.62	25.0017	1756.12	16.2925	1761.47	19.5756	1761.47	19.5756	99.4408
151PL02-4	212.097	122545	3.14702	9.14543	0.738043	4.8493	1.43275	0.321649	1.22804	0.857117	1797.78	19.2662	1793.49	12.0614	1788.5	13.4461	1788.5	13.4461	100.519
151PL02-11	257.997	93621.1	4.97951	9.14425	1.00021	4.92857	2.60158	0.326865	2.40162	0.923141	1823.17	38.139	1807.16	21.9637	1788.73	18.2227	1788.73	18.2227	101.925
151PL02-49	720.09	436825	4.14686	9.1062	0.244767	5.00976	2.1302	0.330867	2.11609	0.993377	1842.58	33.9136	1820.97	18.0325	1796.33	4.45556	1796.33	4.45556	102.575
151PL02-17	154.055	57478.4	3.08975	9.10428	1.4123	4.84147	2.16334	0.319685	1.63873	0.757502	1788.19	25.5906	1792.13	18.2077	1796.71	25.7048	1796.71	25.7048	99.5256
151PL02-8	321.373	246033	3.1071	9.04206	0.40283	4.96917	1.48552	0.325874	1.42986	0.962531	1818.35	22.6549	1814.09	12.5574	1809.18	7.32125	1809.18	7.32125	100.507
151PL02-89	152.143	120669	1.59114	8.85512	1.07982	5.0136	2.95705	0.32199	2.75284	0.930942	1799.44	43.2236	1821.62	25.0375	1847.06	19.5335	1847.06	19.5335	97.4218
151PL02-24	314.288	178047	1.9396	8.67923	0.472469	5.54219	1.2577	0.348868	1.16559	0.926757	1929.19	19.4337	1907.17	10.8189	1883.27	8.50822	1883.27	8.50822	102.438
151PL02-92	214.954	171451	1.81091	5.74916	0.185014	11.9498	2.07406	0.498271	2.06579	0.996013	2606.36	44.2881	2600.48	19.4358	2595.89	3.08246	2595.89	3.08246	100.403
151PL02-30	238.629	519276	1.01826	5.38888	0.161641	13.6637	0.942336	0.53403	0.928369	0.985179	2758.41	20.834	2726.68	8.91603	2703.25	2.66845	2703.25	2.66845	102.04
151PL02-69	33.7338	24352.4	2.00362	4.64185	1.20514	17.9992	2.30716	0.605957	1.96739	0.852731	3053.8	47.8546	2989.69	22.197	2946.84	19.4609	2946.84	19.4609	103.63
151PL02-31	225.484	159147	1.20999	4.60849	0.27333	17.6261	1.54406	0.589132	1.51968	0.984207	2985.9	36.3184	2969.55	14.8375	2958.48	4.41007	2958.48	4.41007	100.927
Table 1PL13. U-Pb geochronologic analyses.
							Isotope ratios						Apparent ages (Ma)
Analysis	U	206Pb	U/Th	206Pb*	±	207Pb*	±	206Pb*	±	error	206Pb*	±	207Pb*	±	206Pb*	±	Best age	±	Conc
	(ppm)	204Pb		207Pb*	(%)	235U*	(%)	238U	(%)	corr.	238U*	(Ma)	235U	(Ma)	207Pb*	(Ma)	(Ma)	(Ma)	(%)
1PL13-61 <>	74.1215	159147	2.58655	9.2633	0.935736	4.87676	2.02964	0.327639	1.80107	0.887382	1826.93	28.6528	1798.25	17.1035	1765.13	17.0977	1765.13	17.0977	86.6005
1PL13-61 <>	74.1215	159147	2.58655	9.2633	0.935736	4.87676	2.02964	0.327639	1.80107	0.887382	1826.93	28.6528	1798.25	17.1035	1765.13	17.0977	1765.13	17.0977	96.8379
1PL13-67 <>	98.1756	117115	1.24679	9.24895	0.70135	4.84347	1.54322	0.324899	1.37465	0.890762	1813.61	21.7308	1792.48	12.9888	1767.97	12.8099	1767.97	12.8099	102.385
1PL13-67 <>	98.1756	117115	1.24679	9.24895	0.70135	4.84347	1.54322	0.324899	1.37465	0.890762	1813.61	21.7308	1792.48	12.9888	1767.97	12.8099	1767.97	12.8099	98.8178
1PL13-65 <>	33.7913	75202.3	0.890232	9.23943	1.92833	4.78931	3.13949	0.320935	2.47749	0.789136	1794.29	38.8035	1783.03	26.3775	1769.85	35.2166	1769.85	35.2166	98.4726
1PL13-65 <>	33.7913	75202.3	0.890232	9.23943	1.92833	4.78931	3.13949	0.320935	2.47749	0.789136	1794.29	38.8035	1783.03	26.3775	1769.85	35.2166	1769.85	35.2166	96.3531
1PL13-79 <>	135.595	115060	1.48783	9.21141	0.569585	4.78366	1.35688	0.319584	1.23154	0.907628	1787.7	19.2272	1782.04	11.3958	1775.39	10.3934	1775.39	10.3934	93.1636
1PL13-79 <>	135.595	115060	1.48783	9.21141	0.569585	4.78366	1.35688	0.319584	1.23154	0.907628	1787.7	19.2272	1782.04	11.3958	1775.39	10.3934	1775.39	10.3934	99.9627
1PL13-81 <>	35.399	89738.9	1.24467	9.19921	1.78526	4.9111	3.0794	0.327663	2.5091	0.8148	1827.04	39.9191	1804.16	25.9837	1777.81	32.5727	1777.81	32.5727	99.1175
1PL13-81 <>	35.399	89738.9	1.24467	9.19921	1.78526	4.9111	3.0794	0.327663	2.5091	0.8148	1827.04	39.9191	1804.16	25.9837	1777.81	32.5727	1777.81	32.5727	93.007
1PL13-30 <>	411.192	40227.2	2.03756	9.19774	0.241303	4.38401	3.00897	0.29245	2.99928	0.996779	1653.76	43.7502	1709.33	24.8829	1778.1	4.40056	1778.1	4.40056	95.9619
1PL13-30 <>	411.192	40227.2	2.03756	9.19774	0.241303	4.38401	3.00897	0.29245	2.99928	0.996779	1653.76	43.7502	1709.33	24.8829	1778.1	4.40056	1778.1	4.40056	98.1356
1PL13-84 <>	75.1059	52010.4	1.55045	9.19314	0.975469	4.86935	2.07708	0.324664	1.83377	0.88286	1812.46	28.973	1796.97	17.4987	1779.02	17.7933	1779.02	17.7933	99.966
1PL13-84 <>	75.1059	52010.4	1.55045	9.19314	0.975469	4.86935	2.07708	0.324664	1.83377	0.88286	1812.46	28.973	1796.97	17.4987	1779.02	17.7933	1779.02	17.7933	100.544
1PL13-74 <>	176.514	35552.2	0.906493	9.18543	0.522649	4.04075	6.78892	0.269191	6.76877	0.997032	1536.69	92.5531	1642.44	55.3129	1780.54	9.53068	1780.54	9.53068	91.4752
1PL13-74 <>	176.514	35552.2	0.906493	9.18543	0.522649	4.04075	6.78892	0.269191	6.76877	0.997032	1536.69	92.5531	1642.44	55.3129	1780.54	9.53068	1780.54	9.53068	87.604
1PL13-36 <>	191.83	216486	0.845356	9.18536	0.501396	4.67367	3.84416	0.311353	3.81132	0.991457	1747.36	58.3363	1762.54	32.164	1780.56	9.14303	1780.56	9.14303	101.691
1PL13-36 <>	191.83	216486	0.845356	9.18536	0.501396	4.67367	3.84416	0.311353	3.81132	0.991457	1747.36	58.3363	1762.54	32.164	1780.56	9.14303	1780.56	9.14303	101.872
1PL13-83 <>	220.478	21920.8	1.82919	9.18311	0.508873	4.14267	5.38217	0.275911	5.35806	0.99552	1570.74	74.6953	1662.76	44.0505	1781	9.27889	1781	9.27889	101.025
1PL13-83 <>	220.478	21920.8	1.82919	9.18311	0.508873	4.14267	5.38217	0.275911	5.35806	0.99552	1570.74	74.6953	1662.76	44.0505	1781	9.27889	1781	9.27889	95.4367
1PL13-46 <>	177.492	515569	1.39324	9.18216	0.4886	4.88154	1.97453	0.325088	1.91312	0.9689	1814.53	30.2566	1799.08	16.6417	1781.19	8.90894	1781.19	8.90894	100.752
1PL13-46 <>	177.492	515569	1.39324	9.18216	0.4886	4.88154	1.97453	0.325088	1.91312	0.9689	1814.53	30.2566	1799.08	16.6417	1781.19	8.90894	1781.19	8.90894	93.6543
1PL13-72 <>	251.388	522828	1.72563	9.17996	0.141095	4.85648	1.15759	0.323341	1.14896	0.992544	1806.03	18.0973	1794.74	9.74728	1781.63	2.57124	1781.63	2.57124	99.0397
1PL13-72 <>	251.388	522828	1.72563	9.17996	0.141095	4.85648	1.15759	0.323341	1.14896	0.992544	1806.03	18.0973	1794.74	9.74728	1781.63	2.57124	1781.63	2.57124	101.33
1PL13-3 <>	267.874	80573.8	1.32105	9.17927	0.283883	4.60986	4.49024	0.306898	4.48126	0.997999	1725.42	67.8401	1751.05	37.4828	1781.77	5.17508	1781.77	5.17508	101.48
1PL13-3 <>	267.874	80573.8	1.32105	9.17927	0.283883	4.60986	4.49024	0.306898	4.48126	0.997999	1725.42	67.8401	1751.05	37.4828	1781.77	5.17508	1781.77	5.17508	103.501
1PL13-40 <>	385.124	14985.4	1.31267	9.17847	0.342398	4.32184	7.86301	0.287699	7.85556	0.999051	1630.02	113.152	1697.54	64.9258	1781.93	6.24203	1781.93	6.24203	100.988
1PL13-40 <>	385.124	14985.4	1.31267	9.17847	0.342398	4.32184	7.86301	0.287699	7.85556	0.999051	1630.02	113.152	1697.54	64.9258	1781.93	6.24203	1781.93	6.24203	89.2812
1PL13-57 <>	243.264	139677	2.86562	9.174	0.337565	4.86118	1.39554	0.323444	1.35409	0.970304	1806.53	21.3335	1795.55	11.7529	1782.81	6.15324	1782.81	6.15324	101.381
1PL13-57 <>	243.264	139677	2.86562	9.174	0.337565	4.86118	1.39554	0.323444	1.35409	0.970304	1806.53	21.3335	1795.55	11.7529	1782.81	6.15324	1782.81	6.15324	102.581
1PL13-39 <>	146.78	101768	3.02937	9.17192	0.515831	4.82037	1.72139	0.320656	1.64229	0.954046	1792.93	25.7051	1788.46	14.4767	1783.23	9.40322	1783.23	9.40322	101.369
1PL13-39 <>	146.78	101768	3.02937	9.17192	0.515831	4.82037	1.72139	0.320656	1.64229	0.954046	1792.93	25.7051	1788.46	14.4767	1783.23	9.40322	1783.23	9.40322	86.3048
1PL13-15 <>	147.194	218338	0.707637	9.17129	0.480735	4.72649	1.06135	0.314389	0.946234	0.891538	1762.27	14.5902	1771.95	8.89509	1783.35	8.76319	1783.35	8.76319	103.718
1PL13-15 <>	147.194	218338	0.707637	9.17129	0.480735	4.72649	1.06135	0.314389	0.946234	0.891538	1762.27	14.5902	1771.95	8.89509	1783.35	8.76319	1783.35	8.76319	100.693
1PL13-37 <>	175.155	192496	1.49993	9.16853	0.390311	4.79249	0.946008	0.318683	0.861736	0.910918	1783.3	13.4249	1783.58	7.94748	1783.9	7.11404	1783.9	7.11404	102.769
1PL13-37 <>	175.155	192496	1.49993	9.16853	0.390311	4.79249	0.946008	0.318683	0.861736	0.910918	1783.3	13.4249	1783.58	7.94748	1783.9	7.11404	1783.9	7.11404	88.1938
1PL13-63 <>	232.18	24748.3	1.60126	9.1673	0.339838	4.85005	2.7753	0.322468	2.75442	0.992475	1801.77	43.2968	1793.62	23.367	1784.15	6.19367	1784.15	6.19367	101.88
1PL13-63 <>	232.18	24748.3	1.60126	9.1673	0.339838	4.85005	2.7753	0.322468	2.75442	0.992475	1801.77	43.2968	1793.62	23.367	1784.15	6.19367	1784.15	6.19367	94.7473
1PL13-45 <>	179.072	242319	1.69422	9.16708	0.316768	4.88906	1.97691	0.325054	1.95137	0.987079	1814.36	30.859	1800.37	16.6662	1784.19	5.77306	1784.19	5.77306	102.224
1PL13-45 <>	179.072	242319	1.69422	9.16708	0.316768	4.88906	1.97691	0.325054	1.95137	0.987079	1814.36	30.859	1800.37	16.6662	1784.19	5.77306	1784.19	5.77306	93.6975
1PL13-95 <>	142.788	145366	1.92998	9.16667	0.335903	4.86791	0.787855	0.323633	0.71266	0.904557	1807.45	11.2328	1796.72	6.63653	1784.27	6.12185	1784.27	6.12185	101.387
1PL13-95 <>	142.788	145366	1.92998	9.16667	0.335903	4.86791	0.787855	0.323633	0.71266	0.904557	1807.45	11.2328	1796.72	6.63653	1784.27	6.12185	1784.27	6.12185	102.487
1PL13-7 <>	69.9113	151041	2.76497	9.16447	1.07305	4.93043	1.58526	0.327711	1.16688	0.736081	1827.28	18.5666	1807.48	13.383	1784.71	19.5597	1784.71	19.5597	101.698
1PL13-7 <>	69.9113	151041	2.76497	9.16447	1.07305	4.93043	1.58526	0.327711	1.16688	0.736081	1827.28	18.5666	1807.48	13.383	1784.71	19.5597	1784.71	19.5597	104.626
1PL13-49 <>	121.545	151935	1.07079	9.16385	0.774483	4.84101	1.81881	0.321746	1.64567	0.904808	1798.25	25.8243	1792.05	15.3073	1784.83	14.1165	1784.83	14.1165	101.299
1PL13-49 <>	121.545	151935	1.07079	9.16385	0.774483	4.84101	1.81881	0.321746	1.64567	0.904808	1798.25	25.8243	1792.05	15.3073	1784.83	14.1165	1784.83	14.1165	99.4783
1PL13-52 <>	72.218	50461.5	1.33493	9.15949	0.966604	4.45861	3.70158	0.296189	3.57314	0.965303	1672.39	52.6355	1723.3	30.7091	1785.7	17.617	1785.7	17.617	102.922
1PL13-52 <>	72.218	50461.5	1.33493	9.15949	0.966604	4.45861	3.70158	0.296189	3.57314	0.965303	1672.39	52.6355	1723.3	30.7091	1785.7	17.617	1785.7	17.617	100.428
1PL13-29 <>	182.045	324227	1.51077	9.15799	0.265834	4.75782	1.08134	0.316015	1.04815	0.969311	1770.24	16.2252	1777.49	9.07304	1786	4.84524	1786	4.84524	103.501
1PL13-29 <>	182.045	324227	1.51077	9.15799	0.265834	4.75782	1.08134	0.316015	1.04815	0.969311	1770.24	16.2252	1777.49	9.07304	1786	4.84524	1786	4.84524	102.581
1PL13-48 <>	268.578	234234	2.01829	9.15743	0.362063	4.5574	1.87663	0.302684	1.84137	0.981212	1704.6	27.5812	1741.51	15.6275	1786.11	6.59727	1786.11	6.59727	101.381
1PL13-48 <>	268.578	234234	2.01829	9.15743	0.362063	4.5574	1.87663	0.302684	1.84137	0.981212	1704.6	27.5812	1741.51	15.6275	1786.11	6.59727	1786.11	6.59727	100.693
1PL13-93 <>	254.104	79453.3	1.62215	9.15633	0.441679	5.06454	9.07363	0.336326	9.06288	0.998815	1868.97	147.064	1830.19	77.0879	1786.33	8.04815	1786.33	8.04815	102.769
1PL13-93 <>	254.104	79453.3	1.62215	9.15633	0.441679	5.06454	9.07363	0.336326	9.06288	0.998815	1868.97	147.064	1830.19	77.0879	1786.33	8.04815	1786.33	8.04815	93.007
1PL13-32 <>	115.409	27807.4	1.03783	9.15345	0.778555	4.59027	2.99845	0.304735	2.89561	0.965702	1714.74	43.5978	1747.5	25.0046	1786.9	14.1871	1786.9	14.1871	101.88
1PL13-32 <>	115.409	27807.4	1.03783	9.15345	0.778555	4.59027	2.99845	0.304735	2.89561	0.965702	1714.74	43.5978	1747.5	25.0046	1786.9	14.1871	1786.9	14.1871	86.3048
1PL13-100 <>	174.135	104097	1.55399	9.1532	0.584193	4.83539	1.36617	0.320999	1.23497	0.903962	1794.61	19.3453	1791.08	11.4952	1786.95	10.6448	1786.95	10.6448	98.1356
1PL13-100 <>	174.135	104097	1.55399	9.1532	0.584193	4.83539	1.36617	0.320999	1.23497	0.903962	1794.61	19.3453	1791.08	11.4952	1786.95	10.6448	1786.95	10.6448	88.1938
1PL13-91 <>	143.584	184155	1.50737	9.15275	0.846428	4.9498	1.48396	0.328578	1.21889	0.821378	1831.49	19.4328	1810.79	12.536	1787.04	15.4238	1787.04	15.4238	101.872
1PL13-91 <>	143.584	184155	1.50737	9.15275	0.846428	4.9498	1.48396	0.328578	1.21889	0.821378	1831.49	19.4328	1810.79	12.536	1787.04	15.4238	1787.04	15.4238	101.369
1PL13-97 <>	202.1	216825	2.69174	9.15111	0.391394	4.78543	1.25542	0.317609	1.19285	0.95016	1778.04	18.5358	1782.35	10.5443	1787.37	7.13258	1787.37	7.13258	96.8379
1PL13-97 <>	202.1	216825	2.69174	9.15111	0.391394	4.78543	1.25542	0.317609	1.19285	0.95016	1778.04	18.5358	1782.35	10.5443	1787.37	7.13258	1787.37	7.13258	91.4752
1PL13-19 <>	231.661	58661.4	1.43445	9.14775	0.352488	4.61781	3.8055	0.306372	3.78914	0.995701	1722.83	57.2866	1752.49	31.7726	1788.04	6.42303	1788.04	6.42303	101.33
1PL13-19 <>	231.661	58661.4	1.43445	9.14775	0.352488	4.61781	3.8055	0.306372	3.78914	0.995701	1722.83	57.2866	1752.49	31.7726	1788.04	6.42303	1788.04	6.42303	100.544
1PL13-85 <>	253.683	61597.2	1.82627	9.14686	0.264989	4.53125	3.04785	0.3006	3.03631	0.996213	1694.28	45.2394	1736.73	25.3576	1788.21	4.82853	1788.21	4.82853	98.8178
1PL13-85 <>	253.683	61597.2	1.82627	9.14686	0.264989	4.53125	3.04785	0.3006	3.03631	0.996213	1694.28	45.2394	1736.73	25.3576	1788.21	4.82853	1788.21	4.82853	99.966
1PL13-59 <>	238.358	505188	1.67551	9.14643	0.320727	4.90137	1.28932	0.325138	1.24879	0.968566	1814.77	19.7523	1802.49	10.8736	1788.3	5.84409	1788.3	5.84409	100.988
1PL13-59 <>	238.358	505188	1.67551	9.14643	0.320727	4.90137	1.28932	0.325138	1.24879	0.968566	1814.77	19.7523	1802.49	10.8736	1788.3	5.84409	1788.3	5.84409	101.691
1PL13-92 <>	227.772	158894	0.72606	9.14127	0.385673	4.91948	2.53018	0.326155	2.50062	0.988314	1819.72	39.6461	1805.6	21.3541	1789.33	7.02661	1789.33	7.02661	101.299
1PL13-92 <>	227.772	158894	0.72606	9.14127	0.385673	4.91948	2.53018	0.326155	2.50062	0.988314	1819.72	39.6461	1805.6	21.3541	1789.33	7.02661	1789.33	7.02661	102.385
1PL13-90 <>	100.693	175358	1.24818	9.12487	0.724835	4.92132	1.60128	0.325692	1.42784	0.891684	1817.47	22.6133	1805.92	13.5141	1792.6	13.1988	1792.6	13.1988	100.752
1PL13-90 <>	100.693	175358	1.24818	9.12487	0.724835	4.92132	1.60128	0.325692	1.42784	0.891684	1817.47	22.6133	1805.92	13.5141	1792.6	13.1988	1792.6	13.1988	93.6543
1PL13-17 <>	63.2732	76486.7	0.522839	9.11104	0.751511	4.77524	2.46374	0.315546	2.34633	0.952343	1767.94	36.28	1780.56	20.6876	1795.36	13.6818	1795.36	13.6818	99.1175
1PL13-17 <>	63.2732	76486.7	0.522839	9.11104	0.751511	4.77524	2.46374	0.315546	2.34633	0.952343	1767.94	36.28	1780.56	20.6876	1795.36	13.6818	1795.36	13.6818	95.4367
1PL13-56 <>	138.291	126029	1.06852	9.1046	0.791914	4.81405	1.35901	0.317885	1.10444	0.812678	1779.39	17.1733	1787.36	11.4262	1796.65	14.4151	1796.65	14.4151	104.626
1PL13-56 <>	138.291	126029	1.06852	9.1046	0.791914	4.81405	1.35901	0.317885	1.10444	0.812678	1779.39	17.1733	1787.36	11.4262	1796.65	14.4151	1796.65	14.4151	95.9619
1PL13-64 <>	176.24	15825.9	1.51554	9.06737	1.0301	4.31628	4.44142	0.28385	4.32032	0.972732	1610.72	61.5775	1696.48	36.6304	1804.1	18.732	1804.1	18.732	100.428
1PL13-64 <>	176.24	15825.9	1.51554	9.06737	1.0301	4.31628	4.44142	0.28385	4.32032	0.972732	1610.72	61.5775	1696.48	36.6304	1804.1	18.732	1804.1	18.732	102.487
1PL13-99 <>	173.245	180248	5.57697	8.86272	0.291751	5.3308	1.76548	0.342656	1.74121	0.986251	1899.43	28.6461	1873.82	15.0959	1845.51	5.27901	1845.51	5.27901	99.4783
1PL13-99 <>	173.245	180248	5.57697	8.86272	0.291751	5.3308	1.76548	0.342656	1.74121	0.986251	1899.43	28.6461	1873.82	15.0959	1845.51	5.27901	1845.51	5.27901	96.3531
1PL13-41 <>	272.609	22466.5	0.647019	8.84637	0.402308	4.45189	1.85624	0.285633	1.81212	0.976231	1619.67	25.9536	1722.05	15.392	1848.85	7.27462	1848.85	7.27462	94.7473
1PL13-41 <>	272.609	22466.5	0.647019	8.84637	0.402308	4.45189	1.85624	0.285633	1.81212	0.976231	1619.67	25.9536	1722.05	15.392	1848.85	7.27462	1848.85	7.27462	101.48
1PL13-89 <>	110.699	87681.9	1.44468	8.83165	0.694142	4.82211	2.82038	0.308871	2.73362	0.96924	1735.15	41.5856	1788.76	23.7232	1851.86	12.5486	1851.86	12.5486	101.698
1PL13-89 <>	110.699	87681.9	1.44468	8.83165	0.694142	4.82211	2.82038	0.308871	2.73362	0.96924	1735.15	41.5856	1788.76	23.7232	1851.86	12.5486	1851.86	12.5486	101.387
1PL13-21 <>	151.885	78588.1	1.43521	8.77713	0.463854	4.85375	1.81817	0.308979	1.758	0.966909	1735.68	26.7508	1794.27	15.3087	1863.05	8.37542	1863.05	8.37542	98.4726
1PL13-21 <>	151.885	78588.1	1.43521	8.77713	0.463854	4.85375	1.81817	0.308979	1.758	0.966909	1735.68	26.7508	1794.27	15.3087	1863.05	8.37542	1863.05	8.37542	99.0397
1PL13-24 <>	41.1474	82117.5	3.06113	8.68258	1.03452	5.38341	3.04225	0.339004	2.86095	0.940407	1881.88	46.6937	1882.22	26.057	1882.58	18.634	1882.58	18.634	89.2812
1PL13-24 <>	41.1474	82117.5	3.06113	8.68258	1.03452	5.38341	3.04225	0.339004	2.86095	0.940407	1881.88	46.6937	1882.22	26.057	1882.58	18.634	1882.58	18.634	102.922
1PL13-1 <>	238.566	14020.5	1.10658	5.91521	1.42385	9.5157	9.33969	0.408234	9.23052	0.988311	2206.84	172.537	2389.06	86.0205	2548.31	23.855	2548.31	23.855	87.604
1PL13-1 <>	238.566	14020.5	1.10658	5.91521	1.42385	9.5157	9.33969	0.408234	9.23052	0.988311	2206.84	172.537	2389.06	86.0205	2548.31	23.855	2548.31	23.855	93.6975
1PL13-88 <>	140.618	27991.7	1.40756	5.41962	0.233692	13.5581	1.34637	0.532924	1.32593	0.984821	2753.76	29.7158	2719.34	12.7324	2693.86	3.86136	2693.86	3.86136	93.1636
1PL13-88 <>	140.618	27991.7	1.40756	5.41962	0.233692	13.5581	1.34637	0.532924	1.32593	0.984821	2753.76	29.7158	2719.34	12.7324	2693.86	3.86136	2693.86	3.86136	99.9627
1PL13-77 <>	34.5499	140031	1.3072	5.37369	0.643565	14.01	1.48253	0.546021	1.33556	0.900865	2808.6	30.4074	2750.38	14.0514	2707.91	10.6197	2707.91	10.6197	86.6005
1PL13-77 <>	34.5499	140031	1.3072	5.37369	0.643565	14.01	1.48253	0.546021	1.33556	0.900865	2808.6	30.4074	2750.38	14.0514	2707.91	10.6197	2707.91	10.6197	102.224
1PL13-47 <>	52.9075	82081.2	1.09194	5.33645	0.681968	13.7295	1.40633	0.531381	1.22992	0.874555	2747.27	27.5118	2731.23	13.311	2719.38	11.2412	2719.38	11.2412	103.718
1PL13-47 <>	52.9075	82081.2	1.09194	5.33645	0.681968	13.7295	1.40633	0.531381	1.22992	0.874555	2747.27	27.5118	2731.23	13.311	2719.38	11.2412	2719.38	11.2412	101.025
Table 05-MKT-12. U-Pb geochronologic analyses.
							Isotope ratios						Apparent ages (Ma)
Analysis	U	206Pb	U/Th	206Pb*	±	207Pb*	±	206Pb*	±	error	206Pb*	±	207Pb*	±	206Pb*	±	Best age	±	Conc
	(ppm)	204Pb		207Pb*	(%)	235U*	(%)	238U	(%)	corr.	238U*	(Ma)	235U	(Ma)	207Pb*	(Ma)	(Ma)	(Ma)	(%)
5MKT12-011	44.5743	6040.66	1.35851	15.7825	13.9412	0.669925	14.661	0.0766834	4.53736	0.309484	476.296	20.8323	520.667	59.7896	720.356	297.222	476.296	20.8323	66.1195
5MKT12-017	645.113	62200	1.65605	17.3833	0.747882	0.620946	1.52329	0.078286	1.32706	0.87118	485.884	6.21097	490.44	5.92521	511.783	16.4471	485.884	6.21097	94.9395
5MKT12-018	175.391	109742	1.46488	17.784	2.54778	0.608001	3.57328	0.0784209	2.50542	0.701155	486.69	11.7447	482.299	13.7196	461.458	56.486	486.69	11.7447	105.468
5MKT12-004	81.0939	27773.5	1.49044	18.0919	6.93029	0.600886	7.16109	0.0788453	1.8034	0.251833	489.227	8.49623	477.796	27.2989	423.272	154.835	489.227	8.49623	115.582
5MKT12-021	186.56	67945.7	2.07177	17.1702	2.50808	0.634285	2.80043	0.0789875	1.24577	0.444849	490.077	5.87892	498.761	11.0364	538.821	54.8737	490.077	5.87892	90.9535
5MKT12-029	99.8699	32855.8	1.36224	18.3123	6.24561	0.594756	6.78823	0.0789917	2.6594	0.391767	490.101	12.5506	473.9	25.7113	396.187	140.132	490.101	12.5506	123.705
5MKT12-026	96.7209	27351.4	1.55684	18.0785	3.51858	0.603386	3.74059	0.0791145	1.26949	0.339383	490.835	5.9998	479.38	14.2941	424.929	78.5291	490.835	5.9998	115.51
5MKT12-002	173.007	90829.3	1.91515	17.3641	2.60486	0.628656	3.615	0.0791706	2.50658	0.693383	491.17	11.8542	495.259	14.1694	514.207	57.2219	491.17	11.8542	95.5199
5MKT12-038	58.3905	31445.9	0.901962	17.5631	9.05195	0.624748	11.4851	0.0795802	7.0689	0.615485	493.617	33.5911	492.819	44.871	489.127	200.057	493.617	33.5911	100.918
5MKT12-039	79.3063	33066.5	1.04472	17.821	6.05319	0.615739	6.24543	0.0795841	1.53763	0.246201	493.64	7.30702	487.173	24.1713	456.87	134.422	493.64	7.30702	108.048
5MKT12-005	80.8325	40350.2	1.2352	17.2879	3.84159	0.634743	4.31349	0.0795863	1.96173	0.45479	493.653	9.32264	499.046	17.0078	523.838	84.2793	493.653	9.32264	94.2377
5MKT12-036	51.9295	16294.6	2.09652	17.5036	6.30371	0.627415	6.77529	0.0796491	2.48351	0.366555	494.028	11.8109	494.484	26.5285	496.619	139.04	494.028	11.8109	99.4782
5MKT12-010R	187.386	157773	1.59633	17.4364	2.14379	0.629921	2.52427	0.0796601	1.33271	0.527958	494.094	6.3388	496.047	9.906	505.079	47.1617	494.094	6.3388	97.825
5MKT12-015	206.385	81970.5	1.54137	17.5675	2.6144	0.625291	2.66567	0.0796693	0.520267	0.195173	494.149	2.47483	493.159	10.4136	488.565	57.6942	494.149	2.47483	101.143
5MKT12-013	166.487	89049.2	1.42211	17.491	1.62114	0.628359	1.82834	0.0797114	0.845402	0.462389	494.4	4.02341	495.073	7.16392	498.168	35.6976	494.4	4.02341	99.2435
5MKT12-007	129.547	22660.3	1.5432	17.643	2.68965	0.623347	2.83655	0.0797628	0.901015	0.317645	494.707	4.29064	491.943	11.06	479.076	59.4522	494.707	4.29064	103.263
5MKT12-032	147.716	85582.7	1.32226	17.4269	2.57399	0.631842	3.02735	0.0798595	1.59355	0.526385	495.284	7.59702	497.243	11.9026	506.284	56.63	495.284	7.59702	97.8273
5MKT12-003R	70.891	37220.1	1.82551	17.5986	7.35329	0.626875	7.50593	0.0800125	1.50605	0.200648	496.198	7.19262	494.147	29.3753	484.677	162.543	496.198	7.19262	102.377
5MKT12-025	102.332	30759	1.54818	17.6995	3.51011	0.625028	4.12548	0.0802341	2.16764	0.525427	497.52	10.3788	492.994	16.1131	472.036	77.6911	497.52	10.3788	105.399
5MKT12-031	117.187	54926.7	1.56381	17.6244	3.05996	0.628586	3.34895	0.0803484	1.36094	0.406377	498.202	6.52483	495.215	13.1255	481.407	67.6263	498.202	6.52483	103.489
5MKT12-024	64.1674	25884.5	1.78499	18.3157	7.75101	0.605871	7.83345	0.0804827	1.13345	0.144693	499.003	5.44258	480.953	30.0178	395.773	174.016	499.003	5.44258	126.083
5MKT12-016	87.3011	23919.5	1.2526	17.6915	4.25726	0.627716	4.6336	0.0805428	1.82919	0.394767	499.362	8.78947	494.672	18.1459	473.019	94.2442	499.362	8.78947	105.569
5MKT12-028	85.2242	43073.1	1.57401	17.3634	4.7927	0.639683	5.31683	0.0805561	2.30188	0.432943	499.441	11.0625	502.11	21.0644	514.311	105.337	499.441	11.0625	97.1088
5MKT12-030	226.396	108876	2.09649	17.5527	2.79922	0.633523	4.48727	0.0806502	3.50714	0.781574	500.003	16.873	498.288	17.6723	490.421	61.7653	500.003	16.873	101.954
5MKT12-014	116.34	32960	1.81152	17.2646	3.27489	0.644504	3.49689	0.0807013	1.22608	0.350621	500.307	5.90219	505.091	13.9165	526.837	71.8013	500.307	5.90219	94.9644
5MKT12-009	54.2279	28155.7	1.63826	17.9113	7.01826	0.622984	7.4331	0.0809286	2.44845	0.329399	501.663	11.8172	491.716	28.9788	445.626	156.159	501.663	11.8172	112.575
5MKT12-002R	195.964	59272	1.63398	17.4948	3.59355	0.638599	4.35098	0.0810281	2.45303	0.563789	502.256	11.8528	501.439	17.2192	497.707	79.1971	502.256	11.8528	100.914
5MKT12-027	60.6359	29833.9	1.73199	17.9438	7.10725	0.622652	7.20366	0.0810323	1.17466	0.163064	502.281	5.67609	491.508	28.0746	441.59	158.26	502.281	5.67609	113.744
5MKT12-035	122.353	55976.5	1.5928	17.4702	3.10383	0.639727	3.29144	0.0810571	1.09538	0.332798	502.429	5.29453	502.137	13.0396	500.825	68.3752	502.429	5.29453	100.32
5MKT12-033	76.1525	28779.3	1.34267	17.7873	7.26884	0.628819	7.4812	0.0811214	1.76981	0.236567	502.813	8.56063	495.36	29.3342	461.036	161.329	502.813	8.56063	109.061
5MKT12-020	78.6962	33395.9	1.57685	17.9977	3.57836	0.621581	3.69756	0.0811362	0.93128	0.251864	502.901	4.50539	490.838	14.3924	434.908	79.6929	502.901	4.50539	115.634
5MKT12-008	28.8875	17078	1.45705	18.5402	11.5253	0.604206	12.1129	0.0812453	3.72679	0.307672	503.551	18.0521	479.899	46.3558	368.391	260.443	503.551	18.0521	136.689
5MKT12-037	59.1769	19722.9	1.56687	17.7911	6.32608	0.631781	6.45826	0.0815208	1.29998	0.201289	505.194	6.31666	497.205	25.3946	460.567	140.359	505.194	6.31666	109.69
5MKT12-022	123.078	37241.8	1.08571	17.1873	1.62812	0.654591	4.46557	0.0815975	4.15819	0.931166	505.651	20.2225	511.3	17.9404	536.63	35.6266	505.651	20.2225	94.227
5MKT12-034	145.885	67329.2	1.65258	17.7137	2.96221	0.635355	3.28144	0.0816254	1.41181	0.43024	505.817	6.8682	499.426	12.9456	470.22	65.5842	505.817	6.8682	107.57
5MKT12-012	57.3787	109738	1.70947	17.57	5.58075	0.642138	5.83304	0.0818275	1.69695	0.29092	507.021	8.27424	503.629	23.1643	488.27	123.228	507.021	8.27424	103.84
5MKT12-023	136.548	6685.7	1.08066	16.6912	5.03886	0.676353	5.59762	0.0818768	2.43787	0.43552	507.316	11.8936	524.568	22.9359	600.364	109.156	507.316	11.8936	84.5013
5MKT12-040	74.7335	20183.7	1.4402	17.765	5.27381	0.641576	5.93882	0.082663	2.73066	0.459798	511.999	13.4402	503.282	23.5719	463.869	116.914	511.999	13.4402	110.376
5MKT12-001	47.5292	14973.4	1.75289	18.0672	8.55365	0.642858	8.98774	0.0842376	2.75944	0.307023	521.367	13.8204	504.074	35.7252	426.318	191.069	521.367	13.8204	122.295
5MKT12-006R	93.2069	28354	1.1553	16.2387	8.42082	0.750944	9.24018	0.0884415	3.80404	0.411684	546.314	19.9258	568.772	40.2599	659.61	180.8	546.314	19.9258	82.8237
Table 06-MKT-12. U-Pb geochronologic analyses.
							Isotope ratios						Apparent ages (Ma)
Analysis	U	206Pb	U/Th	206Pb*	±	207Pb*	±	206Pb*	±	error	206Pb*	±	207Pb*	±	206Pb*	±	Best age	±	Conc
	(ppm)	204Pb		207Pb*	(%)	235U*	(%)	238U	(%)	corr.	238U*	(Ma)	235U	(Ma)	207Pb*	(Ma)	(Ma)	(Ma)	(%)
6MKT12-001R	156.968	17759.2	1.85896	18.1478	4.65967	0.431674	5.35151	0.0568171	2.63174	0.491776	356.239	9.12096	364.364	16.3853	416.385	104.143	356.239	9.12096	NA
6MKT12-001C	203.218	4260.38	1.06059	17.0596	2.91816	0.517944	6.75496	0.0640844	6.09212	0.901872	400.417	23.6518	423.777	23.4076	552.923	63.6848	400.417	23.6518	72.4181
6MKT12-008	176.508	38789.2	0.925631	17.4274	3.58358	0.53339	4.33224	0.067418	2.4344	0.561927	420.581	9.9118	434.057	15.3027	506.202	78.8744	420.581	9.9118	83.0857
6MKT12-020	154.023	28813.2	1.066	16.6561	4.18713	0.647396	5.84488	0.0782064	4.07807	0.697716	485.408	19.0684	506.875	23.3268	604.925	90.6355	485.408	19.0684	80.2427
6MKT12-003	149.251	85268.6	1.74429	17.1616	3.03237	0.633078	3.27878	0.0787976	1.24706	0.380344	488.942	5.87192	498.011	12.9067	539.939	66.3154	488.942	5.87192	90.5549
6MKT12-031	70.1389	30418.7	1.66022	17.8801	8.64048	0.613827	8.92923	0.0796003	2.25237	0.252247	493.737	10.7056	485.971	34.4985	449.493	192.262	493.737	10.7056	109.843
6MKT12-026	68.6888	16489.9	1.37703	17.7743	8.78768	0.618257	9.01479	0.0797002	2.01072	0.223047	494.333	9.56813	488.754	34.9848	462.71	195.096	494.333	9.56813	106.834
6MKT12-034	49.3351	27188.7	1.91987	17.3298	9.213	0.63461	9.67243	0.0797626	2.94559	0.304535	494.705	14.0269	498.963	38.1472	518.523	202.601	494.705	14.0269	95.4067
6MKT12-013	65.5377	43294.1	1.94425	17.35	4.38737	0.634245	5.0007	0.0798095	2.39959	0.479851	494.985	11.4331	498.737	19.7086	515.97	96.3927	494.985	11.4331	95.9329
6MKT12-002	77.6139	41240	1.52868	17.5877	4.61931	0.626428	5.07969	0.0799058	2.11311	0.415991	495.56	10.0793	493.868	19.8682	486.036	102.015	495.56	10.0793	101.96
6MKT12-028	86.8316	61613.3	1.92135	17.6573	6.03457	0.626492	6.29891	0.0802301	1.80561	0.286654	497.496	8.64497	493.908	24.6402	477.286	133.494	497.496	8.64497	104.234
6MKT12-025	105.177	46006.9	1.60015	17.803	4.04121	0.621528	4.36368	0.0802513	1.64631	0.377275	497.623	7.88418	490.804	16.9847	459.125	89.6679	497.623	7.88418	108.385
6MKT12-035	137.956	14205.8	1.23405	16.378	4.94436	0.67576	8.91181	0.0802698	7.41443	0.831977	497.733	35.5157	524.209	36.506	641.28	106.36	497.733	35.5157	77.6155
6MKT12-017	90.4204	43307.8	1.87851	17.6791	7.47381	0.626518	7.56847	0.0803326	1.19329	0.157666	498.108	5.72004	493.925	29.6098	474.599	165.521	498.108	5.72004	104.953
6MKT12-021	125.329	72445	1.60055	17.8288	4.0896	0.621319	4.77821	0.0803407	2.47114	0.517168	498.156	11.8465	490.674	18.5947	455.886	90.7777	498.156	11.8465	109.272
6MKT12-006	177.629	114020	1.42682	17.7782	1.63022	0.623141	1.87462	0.0803478	0.925519	0.49371	498.198	4.43725	491.814	7.30771	462.171	36.1356	498.198	4.43725	107.795
6MKT12-028R	90.2767	33471.2	1.57564	17.3711	2.55488	0.638887	5.18796	0.0804916	4.51525	0.870333	499.057	21.6836	501.617	20.5381	513.326	56.1406	499.057	21.6836	97.2202
6MKT12-033	108.669	44155.4	1.62919	17.0985	5.56471	0.650663	5.85094	0.0806884	1.80762	0.308945	500.231	8.70036	508.886	23.4223	547.992	121.648	500.231	8.70036	91.2842
6MKT12-004	47.3667	21263.8	1.58299	17.9677	13.6397	0.619337	13.7301	0.0807082	1.57297	0.114564	500.349	7.57268	489.432	53.3694	438.63	304.797	500.349	7.57268	114.071
6MKT12-018	88.7541	31863	0.961971	18.0985	2.84893	0.614868	3.10758	0.0807095	1.24125	0.399426	500.356	5.97576	486.626	12.0148	422.455	63.5961	500.356	5.97576	118.44
6MKT12-005	31.7144	38057.1	1.85225	17.551	14.5362	0.634456	14.8594	0.080761	3.08231	0.207432	500.664	14.848	498.868	58.633	490.618	322.144	500.664	14.848	102.047
6MKT12-023	83.1667	42953.5	1.66352	17.9128	4.65104	0.624332	5.24229	0.0811106	2.41856	0.461356	502.749	11.6972	492.559	20.4621	445.434	103.42	502.749	11.6972	112.867
6MKT12-009	68.582	22681.3	0.934669	17.5898	7.24277	0.636671	7.34309	0.0812221	1.20966	0.164734	503.413	5.85789	500.243	29.0122	485.768	160.076	503.413	5.85789	103.632
6MKT12-019	133.356	49011.1	1.73491	17.4548	2.93967	0.642231	3.79208	0.0813025	2.39546	0.631701	503.892	11.6109	503.687	15.059	502.76	64.7379	503.892	11.6109	100.225
6MKT12-022	49.5181	28804.3	1.59837	17.6136	10.7821	0.636531	10.9899	0.0813142	2.12683	0.193526	503.963	10.3102	500.156	43.4294	482.797	238.756	503.963	10.3102	104.384
6MKT12-029	81.4302	39389.2	1.41438	17.3756	5.23537	0.645294	5.35774	0.0813198	1.13855	0.212506	503.996	5.51969	505.579	21.3398	512.767	115.107	503.996	5.51969	98.2894
6MKT12-010	124.883	95338	1.55335	18.0526	4.51433	0.621105	4.58271	0.081321	0.788723	0.172108	504.003	3.82376	490.54	17.83	428.131	100.708	504.003	3.82376	117.722
6MKT12-027	102.38	45977	1.06616	17.4947	3.50535	0.641476	3.66254	0.0813927	1.06148	0.289821	504.43	5.15031	503.22	14.5341	497.723	77.2567	504.43	5.15031	101.348
6MKT12-012	96.9408	33420	1.60696	17.3327	4.05128	0.647522	4.42906	0.0813993	1.78989	0.404123	504.469	8.68518	506.952	17.677	518.15	88.9694	504.469	8.68518	97.3597
6MKT12-016	82.809	35557.6	1.32035	17.4011	6.61447	0.646124	7.91403	0.0815436	4.3452	0.54905	505.33	21.1191	506.091	31.5516	509.551	145.562	505.33	21.1191	99.1716
6MKT12-036	74.0303	33569.9	1.75	17.4704	3.74789	0.645477	4.93276	0.0817866	3.20709	0.650161	506.778	15.6304	505.692	19.65	500.803	82.5472	506.778	15.6304	101.193
6MKT12-011	123.194	17011.7	1.24736	17.7264	3.02478	0.639169	3.49615	0.0821741	1.75321	0.501468	509.086	8.58202	501.792	13.8433	468.659	67.0037	509.086	8.58202	108.626
6MKT12-014	85.4622	40837.8	1.5962	16.9802	3.74196	0.66734	4.41883	0.0821844	2.35028	0.531878	509.148	11.506	519.094	17.96	563.086	81.5472	509.148	11.506	90.421
6MKT12-007	52.1263	21921.4	1.62452	18.2596	6.38755	0.621552	6.6134	0.0823127	1.71354	0.259101	509.912	8.4009	490.819	25.7451	402.651	143.181	509.912	8.4009	126.639
6MKT12-032	144.675	33051.3	1.33645	17.4434	4.59176	0.655512	4.94406	0.0829296	1.83288	0.370724	513.586	9.0482	511.865	19.88	504.165	101.09	513.586	9.0482	101.869
6MKT12-030	60.0047	24848.4	1.75347	17.5143	5.69893	0.66134	5.82068	0.0840071	1.18425	0.203456	519.996	5.91625	515.433	23.5314	495.272	125.69	519.996	5.91625	104.992
6MKT12-030C	49.696	30029.3	1.83383	18.1588	9.38765	0.640913	9.6139	0.0844083	2.07343	0.21567	522.382	10.404	502.871	38.1459	415.031	210.206	522.382	10.404	125.866
6MKT12-015	21.5517	16624.9	1.99074	16.1922	23.9271	0.735765	24.2655	0.0864058	4.03828	0.166421	534.245	20.7046	559.931	104.811	665.745	519.304	534.245	20.7046	80.2478
6MKT12-024	91.7771	41827.9	2.18986	10.0997	0.964033	3.39408	3.3402	0.248616	3.19806	0.957445	1431.33	41.0497	1503.03	26.2031	1605.59	17.9751	1605.59	17.9751	89.1468
Table 01-LKB-12. U-Pb geochronologic analyses.
							Isotope ratios						Apparent ages (Ma)
Analysis	U	206Pb	U/Th	206Pb*	±	207Pb*	±	206Pb*	±	error	206Pb*	±	207Pb*	±	206Pb*	±	Best age	±	Conc
	(ppm)	204Pb		207Pb*	(%)	235U*	(%)	238U	(%)	corr.	238U*	(Ma)	235U	(Ma)	207Pb*	(Ma)	(Ma)	(Ma)	(%)
1LKB12-005	23.7122	11863.2	1.20518	19.296	22.5856	0.553057	22.973	0.0773991	4.20117	0.182874	480.579	19.4558	446.997	83.2534	277.682	523.035	480.579	19.4558	173.068
1LKB12-017C	31.7089	15155.9	1.37754	18.6129	16.8163	0.574374	17.3369	0.0775367	4.21684	0.243228	481.403	19.5606	460.839	64.3087	359.568	381.841	481.403	19.5606	133.884
1LKB12-010	21.4601	9365.86	1.25575	19.795	14.8408	0.540668	15.7563	0.0776222	5.29275	0.335912	481.915	24.5766	438.865	56.2018	218.89	345.094	481.915	24.5766	220.163
1LKB12-021	25.9879	7630.32	1.21369	16.1742	11.2975	0.664719	11.4314	0.0779757	1.74433	0.152591	484.028	8.13387	517.496	46.3797	668.106	242.571	484.028	8.13387	72.4478
1LKB12-008	30.5864	11007.3	2.00588	18.0222	11.8953	0.596652	12.1172	0.077988	2.30833	0.190501	484.102	10.7654	475.107	46.0085	431.882	265.902	484.102	10.7654	112.091
1LKB12-006R	24.9206	13854.7	1.50209	18.1235	10.3573	0.595283	10.9563	0.0782464	3.57307	0.326121	485.647	16.715	474.236	41.5356	419.38	231.809	485.647	16.715	115.801
1LKB12-015	16.2717	9569.15	1.81058	26.4492	35.258	0.408297	35.4354	0.0783226	3.54192	0.0999543	486.103	16.5843	347.648	104.685	-498.646	963.18	486.103	16.5843	NA
1LKB12-036	22.8905	20842.6	1.33749	18.7843	15.4916	0.574969	15.9267	0.078332	3.69762	0.232164	486.159	17.3152	461.223	59.1043	338.841	352.729	486.159	17.3152	143.477
1LKB12-031	26.4321	10392.8	1.20418	18.9649	14.1525	0.569591	14.5603	0.0783452	3.42168	0.235001	486.238	16.0256	457.75	53.7008	317.13	323.206	486.238	16.0256	153.324
1LKB12-001	25.1759	10089.8	1.32589	19.2203	13.0791	0.562316	13.4253	0.0783861	3.02927	0.225638	486.482	14.1945	453.033	49.1026	286.657	300.103	486.482	14.1945	169.709
1LKB12-013C	29.5764	10009.9	1.32567	17.3186	7.7819	0.625583	8.30938	0.0785772	2.91339	0.350615	487.624	13.6824	493.341	32.4805	519.942	171.01	487.624	13.6824	93.7843
1LKB12-007	25.1855	15505.7	1.31451	20.3789	16.083	0.532161	16.6336	0.0786544	4.24434	0.255167	488.086	19.9513	433.243	58.7271	151.207	378.935	488.086	19.9513	322.794
1LKB12-019	20.8356	10274.4	1.58297	18.1017	18.288	0.599213	18.6645	0.0786683	3.72999	0.199844	488.169	17.5363	476.734	71.1264	422.064	411.239	488.169	17.5363	115.662
1LKB12-012	16.5472	5744.59	1.60813	19.8568	30.685	0.546671	31.0191	0.0787289	4.5409	0.14639	488.531	21.364	442.814	111.773	211.647	726.249	488.531	21.364	230.823
1LKB12-032	20.1241	8717.85	1.37328	18.1538	30.0194	0.598154	30.2444	0.0787554	3.68257	0.12176	488.689	17.3311	476.062	115.434	415.646	684.807	488.689	17.3311	117.573
1LKB12-002C	26.9167	22576.2	1.25884	18.6826	13.8573	0.581474	14.0634	0.0787891	2.39926	0.170603	488.891	11.296	465.408	52.5505	351.151	314.477	488.891	11.296	139.225
1LKB12-020	27.4435	12782	1.46435	18.2153	21.8285	0.598465	22.1208	0.0790631	3.58457	0.162045	490.528	16.931	476.259	84.2875	408.085	493.661	490.528	16.931	120.203
1LKB12-016	22.9997	15481.5	1.35609	15.6749	7.82036	0.696377	8.32697	0.0791675	2.86015	0.34348	491.152	13.5259	536.625	34.7223	734.906	165.801	491.152	13.5259	66.832
1LKB12-011	24.3785	10154.4	1.54206	20.0824	24.3162	0.544224	24.518	0.0792671	3.13921	0.128037	491.746	14.8629	441.206	87.9561	185.401	573.586	491.746	14.8629	265.234
1LKB12-014	71.1386	35649.3	1.38232	17.1119	6.06044	0.638737	7.13117	0.079272	3.75827	0.527021	491.776	17.7949	501.524	28.2303	546.23	132.518	491.776	17.7949	90.031
1LKB12-033	24.4561	12523.6	1.28336	16.1149	13.769	0.678519	14.223	0.0793028	3.56518	0.250663	491.96	16.8868	525.879	58.4437	675.969	295.654	491.96	16.8868	72.7785
1LKB12-006C	31.0568	25667.2	1.3025	19.4571	15.5445	0.562438	15.9529	0.0793691	3.58676	0.224834	492.356	17.0021	453.112	58.3741	258.608	359.05	492.356	17.0021	190.387
1LKB12-026	31.0456	10196	1.31491	19.735	12.4459	0.555143	13.0384	0.0794587	3.88575	0.298024	492.891	18.4387	448.36	47.2935	225.904	288.609	492.891	18.4387	218.186
1LKB12-013R	20.2945	11445.8	1.42966	17.6032	10.6238	0.622884	10.9327	0.0795241	2.58018	0.236007	493.281	12.2528	491.653	42.6315	484.097	235.17	493.281	12.2528	101.897
1LKB12-017R	40.0023	46665.3	2.23222	18.6349	8.76335	0.58925	9.13196	0.0796388	2.56834	0.281247	493.966	12.2129	470.389	34.3928	356.906	198.202	493.966	12.2129	138.402
1LKB12-025	25.7325	6535.34	1.25833	17.4566	12.4454	0.629251	13.6106	0.0796675	5.50982	0.40482	494.138	26.2089	495.629	53.4247	502.504	274.879	494.138	26.2089	98.3351
1LKB12-037	22.4747	11286.5	1.48939	21.098	18.3277	0.520956	18.6575	0.0797153	3.49243	0.187187	494.423	16.6219	425.79	64.9771	69.2926	439.185	494.423	16.6219	713.529
1LKB12-009R	81.9118	50341.9	1.85491	17.8787	6.12893	0.614862	6.19404	0.0797284	0.895739	0.144613	494.501	4.26381	486.622	23.9512	449.666	136.267	494.501	4.26381	109.971
1LKB12-023	24.3646	11600.2	2.72105	18.2689	13.2427	0.60175	13.5997	0.0797308	3.09555	0.227619	494.516	14.7356	478.344	51.9229	401.514	297.791	494.516	14.7356	123.163
1LKB12-003	23.6434	13091.3	1.17507	23.2083	12.0403	0.473746	12.5214	0.0797422	3.43767	0.274543	494.584	16.3663	393.773	40.8922	-162.502	300.362	494.584	16.3663	NA
1LKB12-024	19.8855	17629.4	1.62175	16.9882	18.391	0.647713	18.6424	0.0798047	3.05124	0.163672	494.957	14.5371	507.07	74.5438	562.063	403.834	494.957	14.5371	88.0608
1LKB12-022	25.0118	14638.4	1.30256	17.4236	10.139	0.63204	10.9826	0.0798694	4.22136	0.384367	495.343	20.1271	497.366	43.2128	506.691	223.531	495.343	20.1271	97.7603
1LKB12-038	18.2658	8232.5	1.54489	19.4462	31.8303	0.56646	32.2326	0.0798919	5.07689	0.157508	495.478	24.2125	455.723	118.892	259.855	748.167	495.478	24.2125	190.675
1LKB12-018	28.9401	18497.6	1.25556	19.8795	13.5604	0.554119	14.0753	0.0798927	3.77245	0.268019	495.482	17.9916	447.692	51.0002	209.024	315.629	495.482	17.9916	237.046
1LKB12-030	25.1639	10677.3	1.25936	18.6144	15.9764	0.592364	16.3871	0.0799719	3.64587	0.222484	495.955	17.4038	472.376	61.9751	359.38	362.56	495.955	17.4038	138.003
1LKB12-034	30.0982	19680.6	1.33372	15.7044	12.466	0.7022	12.8619	0.0799796	3.16677	0.246213	496.001	15.1182	540.104	53.9256	730.926	265.064	496.001	15.1182	67.8593
1LKB12-029	23.4879	16223.8	1.4969	18.3688	11.9758	0.600456	12.7545	0.0799945	4.38844	0.34407	496.09	20.9541	477.523	48.6254	389.284	269.698	496.09	20.9541	127.436
1LKB12-004	23.9755	9384.03	1.25151	17.3061	11.7445	0.640339	11.9979	0.0803728	2.45267	0.204425	498.348	11.7623	502.516	47.5914	521.522	258.476	498.348	11.7623	95.5564
1LKB12-027	17.2898	5638.45	1.72195	20.7768	37.3453	0.53606	37.6098	0.0807778	4.45237	0.118383	500.764	21.452	435.824	134.045	105.666	910.84	500.764	21.452	473.91
1LKB12-002R	34.1744	24051.6	2.01885	19.8002	15.4206	0.567456	15.7768	0.0814894	3.3332	0.211272	505.007	16.1904	456.368	58.0574	218.295	358.763	505.007	16.1904	231.341
1LKB12-035	16.6497	11131.4	1.60547	18.797	17.2869	0.598268	17.8177	0.081561	4.31659	0.242264	505.434	20.9842	476.134	67.8224	337.332	394.212	505.434	20.9842	149.833
1LKB12-028	19.3196	6783.54	1.35295	19.5134	21.5154	0.577065	22.055	0.0816687	4.84893	0.219856	506.075	23.6008	462.573	82.1215	251.972	500.005	506.075	23.6008	200.846
1LKB12-009C	134.917	90010.1	2.79235	13.0553	9.46349	0.997005	12.2354	0.094402	7.7555	0.633857	581.519	43.126	702.288	62.1023	1110.71	189.424	581.519	43.126	52.3556
Table 02-LKB-12. U-Pb geochronologic analyses.
							Isotope ratios						Apparent ages (Ma)
Analysis	U	206Pb	U/Th	206Pb*	±	207Pb*	±	206Pb*	±	error	206Pb*	±	207Pb*	±	206Pb*	±	Best age	±	Conc
	(ppm)	204Pb		207Pb*	(%)	235U*	(%)	238U	(%)	corr.	238U*	(Ma)	235U	(Ma)	207Pb*	(Ma)	(Ma)	(Ma)	(%)
2LKB12-003C	108.969	44409.7	1.07803	17.878	4.16121	0.601443	4.35371	0.0779851	1.2803	0.29407	484.085	5.97073	478.149	16.6039	449.756	92.4797	484.085	5.97073	107.633
2LKB12-005	31.4519	17736.9	1.26119	19.8625	19.7432	0.541652	20.0067	0.0780285	3.23607	0.161749	484.344	15.0994	439.513	71.4918	211.008	461.477	484.344	15.0994	229.538
2LKB12-025	36.3085	23750.4	1.00825	18.4739	9.73424	0.583388	10.163	0.0781654	2.92093	0.287407	485.163	13.6511	466.636	38.0388	376.461	219.467	485.163	13.6511	128.875
2LKB12-001	63.9095	22350.6	0.950115	18.7021	8.33378	0.576961	8.39111	0.0782592	0.979219	0.116697	485.724	4.58153	462.507	31.1825	348.813	188.713	485.724	4.58153	139.251
2LKB12-031	104.037	48790.7	1.55178	18.2658	5.08753	0.590849	5.25843	0.0782735	1.32973	0.252877	485.809	6.22256	471.41	19.833	401.886	114.016	485.809	6.22256	120.882
2LKB12-023	70.7677	33396.3	0.846518	17.3523	4.63575	0.622209	5.01529	0.0783057	1.91389	0.381611	486.002	8.95958	491.231	19.5348	515.67	101.86	486.002	8.95958	94.2466
2LKB12-008	57.8983	28852.1	0.96357	17.9741	6.72604	0.600746	7.03078	0.0783138	2.0475	0.291219	486.05	9.58595	477.707	26.798	437.828	149.883	486.05	9.58595	111.014
2LKB12-007	90.9582	45971.7	1.36533	17.5425	3.45865	0.615753	3.72677	0.0783424	1.388	0.372441	486.221	6.50053	487.182	14.4219	491.724	76.3123	486.221	6.50053	98.8809
2LKB12-020	50.4185	19809.6	0.910579	18.1169	8.47771	0.596642	8.84588	0.0783964	2.52547	0.285497	486.544	11.8353	475.101	33.5765	420.196	189.561	486.544	11.8353	115.79
2LKB12-022	47.6686	16908.8	0.919477	18.2267	16.202	0.593191	16.3373	0.0784156	2.09813	0.128425	486.659	9.83483	472.903	61.8407	406.681	364.726	486.659	9.83483	119.666
2LKB12-002	48.2436	20060.9	0.960695	18.0744	8.27597	0.598512	8.91193	0.0784579	3.30616	0.370982	486.911	15.5052	476.289	33.8938	425.431	184.887	486.911	15.5052	114.451
2LKB12-009C	45.1268	27553.4	0.97423	16.8386	9.40346	0.643526	9.75931	0.0785904	2.61134	0.267574	487.704	12.2658	504.487	38.8195	581.314	204.642	487.704	12.2658	83.8967
2LKB12-030	47.6016	23109.8	0.933402	18.0093	14.8924	0.601748	15.0786	0.0785979	2.36229	0.156665	487.748	11.0969	478.343	57.5807	433.476	333.359	487.748	11.0969	112.52
2LKB12-019	35.123	25573.1	1.2009	18.162	13.034	0.597053	13.6183	0.0786456	3.94608	0.289764	488.033	18.5473	475.362	51.7393	414.643	292.379	488.033	18.5473	117.7
2LKB12-010C	53.4423	22762.9	0.904547	18.7834	7.37097	0.577865	7.69907	0.0787224	2.22362	0.288817	488.492	10.4609	463.088	28.6378	338.958	167.161	488.492	10.4609	144.116
2LKB12-038	35.7644	21364.4	1.3242	19.6953	12.841	0.551526	13.2154	0.0787821	3.12327	0.236336	488.849	14.7036	445.996	47.7349	230.537	297.586	488.849	14.7036	212.048
2LKB12-035	41.8149	21854.1	1.00115	17.4011	6.55996	0.625249	7.75742	0.0789092	4.14058	0.533758	489.609	19.522	493.132	30.3116	509.55	144.377	489.609	19.522	96.0865
2LKB12-024	68.2548	18087.5	0.946107	17.3655	5.05534	0.626591	5.19933	0.0789168	1.21515	0.233713	489.654	5.72968	493.97	20.3395	514.023	111.12	489.654	5.72968	95.2591
2LKB12-036	56.1213	19837.1	1.20594	17.878	5.41996	0.609093	5.48616	0.0789773	0.849758	0.154891	490.015	4.00962	482.988	21.0894	449.749	120.469	490.015	4.00962	108.953
2LKB12-010R	58.6785	18500.8	1.35603	18.6691	7.70241	0.584302	7.91183	0.0791151	1.80832	0.228559	490.839	8.54645	467.222	29.6367	352.804	174.27	490.839	8.54645	139.125
2LKB12-017	47.3913	48716.5	1.64469	18.7337	9.54545	0.582658	9.72134	0.0791654	1.84087	0.189364	491.139	8.70541	466.168	36.3554	344.972	216.414	491.139	8.70541	142.371
2LKB12-014	38.1743	17863.7	1.294	17.53	12.5706	0.622886	13.1453	0.0791935	3.8443	0.292446	491.307	18.1856	491.655	51.2732	493.273	278.114	491.307	18.1856	99.6015
2LKB12-004	435.993	122648	1.37234	17.5322	1.37398	0.622949	1.59842	0.0792113	0.816777	0.51099	491.413	3.86458	491.694	6.2298	492.982	30.2724	491.413	3.86458	99.6818
2LKB12-013R	81.9494	57470.2	1.02086	18.0061	4.44822	0.606735	5.08846	0.0792349	2.47098	0.485605	491.554	11.6947	481.499	19.513	433.877	99.1015	491.554	11.6947	113.294
2LKB12-037	129.509	63570.8	0.990288	17.7868	3.31757	0.614231	3.67819	0.0792368	1.58834	0.431826	491.566	7.51747	486.225	14.2121	461.109	73.5798	491.566	7.51747	106.605
2LKB12-013C	90.7874	32319	1.42748	16.7339	3.50514	0.652891	3.8096	0.0792384	1.49234	0.391731	491.575	7.06324	510.256	15.2805	594.862	75.9958	491.575	7.06324	82.6368
2LKB12-034	147.096	36820.3	1.01149	17.6714	1.71965	0.619602	3.15237	0.0794114	2.64202	0.838105	492.609	12.53	489.598	12.246	475.535	38.0437	492.609	12.53	103.59
2LKB12-009R	54.0113	20181.1	1.46934	17.8716	9.33173	0.614693	9.55092	0.0796749	2.03443	0.213009	494.182	9.6781	486.516	36.9347	450.546	207.662	494.182	9.6781	109.685
2LKB12-016	47.4471	30147.9	1.07137	16.4281	8.27092	0.669519	8.39456	0.0797715	1.43546	0.170999	494.759	6.83638	520.42	34.1951	634.716	178.335	494.759	6.83638	77.9497
2LKB12-027	39.9505	13180	1.25953	16.9829	8.08824	0.648351	8.24061	0.0798586	1.57732	0.191408	495.279	7.51956	507.463	32.9232	562.739	176.479	495.279	7.51956	88.0122
2LKB12-021	91.4475	34833.1	0.976479	17.6829	7.4937	0.622705	7.73167	0.079861	1.90344	0.246187	495.293	9.07454	491.542	30.1352	474.119	165.982	495.293	9.07454	104.466
2LKB12-011	44.6088	25539.2	1.31185	16.7071	8.02723	0.659615	8.49391	0.0799264	2.77672	0.326907	495.683	13.2479	514.379	34.2915	598.351	174.099	495.683	13.2479	82.8416
2LKB12-018	55.9013	21214.7	0.950765	17.8541	8.08234	0.61783	8.15911	0.0800028	1.11656	0.136848	496.139	5.33188	488.486	31.6482	452.729	179.697	496.139	5.33188	109.589
2LKB12-012	95.2269	32724.9	1.01874	17.7139	4.11313	0.623204	4.21992	0.0800651	0.943365	0.22355	496.511	4.50807	491.854	16.4524	470.203	91.0753	496.511	4.50807	105.595
2LKB12-029C	137.151	119705	0.974934	17.3203	2.49087	0.63819	2.7799	0.0801685	1.23426	0.443996	497.129	5.90526	501.185	10.9967	519.729	54.6655	497.129	5.90526	95.6515
2LKB12-003R	69.5372	23449.5	1.26452	18.1804	6.67418	0.608493	6.8706	0.0802337	1.63113	0.237406	497.518	7.80989	482.609	26.3973	412.381	149.354	497.518	7.80989	120.645
2LKB12-026	52.2357	19642.3	1.16889	18.0797	4.5557	0.612343	5.30922	0.0802944	2.72644	0.513529	497.88	13.0634	485.037	20.4766	424.779	101.7	497.88	13.0634	117.209
2LKB12-006	55.4514	11437.9	0.936342	17.9685	7.84229	0.616283	8.28866	0.0803139	2.68335	0.323737	497.996	12.8599	487.515	32.1012	438.527	174.775	497.996	12.8599	113.561
2LKB12-029R	70.7532	24032.4	1.42684	17.6561	3.90313	0.630619	4.37206	0.0807535	1.96989	0.450563	500.619	9.48845	496.481	17.1701	477.426	86.3141	500.619	9.48845	104.858
2LKB12-015	524.214	241510	0.748228	17.5455	0.749095	0.635489	2.11798	0.0808671	1.98108	0.935365	501.296	9.55477	499.509	8.35644	491.31	16.5202	501.296	9.55477	102.033
2LKB12-032	153.149	120686	0.992391	17.4309	2.44008	0.640702	3.11274	0.0809981	1.93266	0.620887	502.078	9.3352	502.741	12.343	505.779	53.6914	502.078	9.3352	99.2683
2LKB12-033	257.869	349302	4.65578	11.3095	1.0569	2.80946	8.09313	0.230443	8.02382	0.991436	1336.82	96.8801	1358.06	60.6768	1391.64	20.2785	1391.64	20.2785	96.0607

## Sheet: Table DR3
Link, P.K., Todt, M.K., Pearson, D.M., and Thomas, R.C., 2017, 500–490 Ma detrital zircons in Upper Cambrian Worm Creek and correlative sandstones, Idaho, Montana, and Wyoming: Magmatism and tectonism within the passive margin: Lithosphere, doi:10.1130/L671.1
GSA Data Repository Item 2017339
Table DR3. Lu-Hf isotope data on dated zircon grains
Order	Sample	(176Yb + 176Lu) / 176Hf (%)	Volts Hf	176Hf/177Hf	± (1s)	176Lu/177Hf	176Hf/177Hf (T)	E-Hf (0)	E-Hf (0) ± (1s)	E-Hf (T)	Age (Ma)
26	01MKT12-058	11.5529	5.34689	0.28235	2.6092e-05	0.000664799	0.282344	-15.3711	0.922679	-4.51879	497
27	01MKT12-001	8.58933	5.32215	0.282323	3.38504e-05	0.00050073	0.282318	-16.3452	1.19704	-5.31189	502.8
28	01MKT12-012	18.3432	4.35413	0.282395	3.2837e-05	0.000995644	0.282386	-13.7833	1.1612	-3.00586	498.5
29	01MKT12-052	36.0669	4.88761	0.282516	1.9833e-05	0.00204853	0.282497	-9.513	0.701344	0.952267	500
30	01MKT12-082	10.2316	4.70717	0.282342	2.96e-05	0.000580555	0.282337	-15.6689	1.04673	-5.05327	485
61	01MKT12-32	37.4929	5.1786	0.282506	2.95027e-05	0.00225311	0.282485	-9.87966	1.04329	0.45453	497
62	01MKT12-038	32.2128	3.57134	0.282448	2.92135e-05	0.00182004	0.282431	-11.9339	1.03307	-1.45905	497
63	01MKT12-034	34.5399	3.23507	0.282376	2.96284e-05	0.00193505	0.282358	-14.4546	1.04774	-3.97825	499
64	01MKT12-030	24.0717	4.9186	0.282399	3.24608e-05	0.00130516	0.282387	-13.6469	1.1479	-2.96097	499
65	01MKT12-047	34.148	5.09194	0.282513	2.33921e-05	0.00195086	0.282495	-9.60232	0.827203	0.853038	498
66	01MKT12-029	14.5226	4.58399	0.282482	3.33463e-05	0.000824611	0.282475	-10.6998	1.17921	0.0612108	495
67	01MKT12-028	35.5642	4.82307	0.282497	2.82703e-05	0.0019709	0.282479	-10.173	0.999711	0.127373	491
68	01MKT12-090	12.2809	6.89657	0.282394	2.31014e-05	0.000740045	0.282387	-13.8143	0.816924	-2.96322	498
69	01MKT12-095	13.3778	5.03641	0.28248	2.75271e-05	0.000856824	0.282472	-10.7691	0.973429	0.00305725	496
70	01MKT12-093	32.4217	4.56142	0.282408	3.11686e-05	0.00181833	0.282391	-13.349	1.1022	-2.85398	498
71	01MKT12-050	42.7109	4.20231	0.282436	2.52807e-05	0.00233327	0.282414	-12.3418	0.89399	-2.01593	498
72	01MKT12-061	27.6215	4.15022	0.282486	3.0678e-05	0.0015599	0.282471	-10.5774	1.08485	0.0489097	500
73	01MKT12-097	15.4194	4.34864	0.282379	2.9272e-05	0.00083343	0.282371	-14.3691	1.03513	-3.63688	494
74	01MKT12-006	15.743	3.60149	0.282533	2.64517e-05	0.000861261	0.282525	-8.89694	0.935401	1.87583	496
75	01MKT12-100	27.7744	3.75287	0.282407	3.21046e-05	0.00151279	0.282393	-13.3821	1.1353	-2.87168	494
Table 02-MKT-12. Hf isotopic data.
Order	Sample	(176Yb + 176Lu) / 176Hf (%)	Volts Hf	176Hf/177Hf	± (1s)	176Lu/177Hf	176Hf/177Hf (T)	E-Hf (0)	E-Hf (0) ± (1s)	E-Hf (T)	Age (Ma)
31	02MKT12-053	9.56487	3.80951	0.28226	3.37451e-05	0.000586932	0.282254	-18.5752	1.19331	-7.48072	507
32	02MKT12-040	11.9513	5.21706	0.282474	3.53038e-05	0.000704293	0.282468	-10.9966	1.24843	-0.240306	493
33	02MKT12-001	12.6204	6.11194	0.282397	2.06361e-05	0.000786708	0.282389	-13.7283	0.729746	-2.95817	495
34	02MKT12-081	33.1047	4.20972	0.282485	2.02101e-05	0.00183883	0.282468	-10.6204	0.71468	-0.213868	494
35	02MKT12-082	41.5774	3.3754	0.282502	3.45806e-05	0.00213305	0.282481	-10.0235	1.22286	0.518118	505
36	02MKT12-010	15.8593	3.81811	0.282386	3.17811e-05	0.000939459	0.282377	-14.1194	1.12386	-3.13857	507
37	02MKT12-097	22.6155	5.14583	0.282466	2.51158e-05	0.00126672	0.282454	-11.2783	0.88816	-0.490722	503
38	02MKT12-016	16.5239	8.65514	0.282519	1.97554e-05	0.000683572	0.282512	-9.41233	0.698602	1.59411	504
39	02MKT12-018	12.0116	5.36983	0.282556	2.53004e-05	0.000673616	0.28255	-8.08879	0.894686	2.87852	502
40	02MKT12-019	41.4708	4.28679	0.282562	2.61962e-05	0.00239306	0.28254	-7.87498	0.926365	2.60268	506
41	02MKT12-035	15.8744	3.87238	0.282509	2.71881e-05	0.000892767	0.282501	-9.76468	0.96144	0.844019	489
42	02MKT12-100	62.3454	3.80454	0.282356	3.53786e-05	0.00351218	0.282322	-15.1726	1.25108	-5.03913	508
43	02MKT12-034	24.6336	3.46249	0.282579	3.83368e-05	0.00138682	0.282566	-7.28593	1.35569	3.22955	492
44	02MKT12-014	12.3784	4.9741	0.282631	3.29742e-05	0.000775291	0.282623	-5.46192	1.16605	5.43061	500
45	02MKT12-066	11.466	5.68395	0.282327	2.98878e-05	0.000676132	0.282321	-16.1825	1.05691	-5.18114	504
46	02MKT12-074	10.3385	4.48334	0.282565	2.72907e-05	0.000609944	0.282559	-7.78868	0.965067	2.95802	491
47	02MKT12-056	13.3869	4.47471	0.282324	2.32027e-05	0.000883285	0.282315	-16.3111	0.820507	-5.4665	500
48	02MKT12-091	10.9878	3.48171	0.282417	3.41255e-05	0.000690245	0.28241	-13.0213	1.20677	-2.08702	501
49	02MKT12-063	15.8852	3.84099	0.282378	4.01518e-05	0.00102869	0.282369	-14.3922	1.41987	-3.76756	492
50	02MKT12-069	15.2764	2.2138	0.28225	5.32166e-05	0.000960945	0.282241	-18.9134	1.88187	-7.98877	505
Table 03-MKT-12 . Hf isotopic data.
Order	Sample	(176Yb + 176Lu) / 176Hf (%)	Volts Hf	176Hf/177Hf	± (1s)	176Lu/177Hf	176Hf/177Hf (T)	E-Hf (0)	E-Hf (0) ± (1s)	E-Hf (T)	Age (Ma)
51	03MKT12-089	11.8293	5.17114	0.282324	3.01939e-05	0.000700855	0.282317	-16.3028	1.06773	-5.20016	509
52	03MKT12-093	21.3153	5.72419	0.282603	3.14012e-05	0.00126556	0.282591	-6.42609	1.11043	4.34575	502
53	03MKT12-097	17.8426	3.08511	0.282393	3.4767e-05	0.00106277	0.282383	-13.8557	1.22945	-3.00286	503
54	03MKT12-050	16.1994	3.03887	0.282463	3.15389e-05	0.000964938	0.282454	-11.3761	1.1153	-0.531341	501
55	03MKT12-047	8.98446	2.76778	0.282362	3.00181e-05	0.000681092	0.282356	-14.9484	1.06152	-4.12303	496
56	03MKT12-059	24.4815	2.40925	0.282499	3.68277e-05	0.00163134	0.282484	-10.1095	1.30232	0.386996	495
57	03MKT12-060	11.9827	3.16486	0.282343	3.03612e-05	0.000822223	0.282335	-15.6479	1.07365	-4.78234	500
58	03MKT12-045	14.009	2.89995	0.282427	2.85847e-05	0.000866928	0.282418	-12.6742	1.01083	-1.86378	498
59	03MKT12-007	26.5883	1.87477	0.282332	4.39931e-05	0.00157285	0.282317	-16.0294	1.55571	-5.41347	500
60	03MKT12-014	38.0687	2.7236	0.28259	3.74165e-05	0.00226695	0.282568	-6.90472	1.32314	3.49093	500
141	03MKT12-080	31.4419	2.57832	0.282617	4.676e-05	0.00189786	0.282599	-5.9481	1.65355	4.44421	494
142	03MKT12-023	21.5342	3.20029	0.282412	2.89243e-05	0.0012541	0.2824	-13.1973	1.02284	-2.60177	494
143	03MKT12-015	41.5575	2.27612	0.282553	4.21783e-05	0.00256191	0.282529	-8.21993	1.49153	2.01419	497
144	03MKT12-022	13.6678	2.80202	0.282306	3.86287e-05	0.000853315	0.282298	-16.9303	1.36601	-6.07646	500
145	03MKT12-031	30.6484	4.31289	0.282592	2.65966e-05	0.00175044	0.282576	-6.81851	0.940522	3.79125	502
146	03MKT12-018	19.3451	2.92675	0.282319	2.94228e-05	0.00115678	0.282308	-16.4957	1.04046	-5.74216	500
147	03MKT12-026	14.7194	3.85965	0.282327	2.83961e-05	0.000916272	0.282318	-16.2049	1.00416	-5.26222	505
148	03MKT12-054	18.4889	2.13934	0.282421	3.9373e-05	0.00122411	0.282409	-12.8722	1.39233	-2.029	505
149	03MKT12-062	6.95088	3.45941	0.28252	2.90525e-05	0.000519337	0.282515	-9.38856	1.02737	1.58457	500
150	03MKT12-061	31.9313	3.0332	0.282385	3.22266e-05	0.00198377	0.282366	-14.1587	1.13961	-3.78254	495
Table 07-MKT-12. Hf isotopic data.
Order	Sample	(176Yb + 176Lu) / 176Hf (%)	Volts Hf	176Hf/177Hf	± (1s)	176Lu/177Hf	176Hf/177Hf (T)	E-Hf (0)	E-Hf (0) ± (1s)	E-Hf (T)	Age (Ma)
101	07MKT12-051	31.7155	4.8673	0.282508	2.35754e-05	0.0018204	0.282491	-9.80047	0.833685	0.78263	502
102	07MKT12-100	28.6807	4.62171	0.282435	2.068e-05	0.00178728	0.282418	-12.3666	0.731297	-1.77536	502
103	07MKT12-98	40.2582	4.65301	0.282539	2.0355e-05	0.00228944	0.282518	-8.69076	0.719804	1.71632	501
104	07MKT12-97	38.578	4.59367	0.282517	2.68785e-05	0.00225595	0.282496	-9.48656	0.950494	0.930779	501
105	07MKT12-64	24.2554	4.70005	0.282499	2.40888e-05	0.00138594	0.282486	-10.1289	0.851841	0.577174	501
106	07MKT12-61	48.7018	2.75607	0.282566	2.42604e-05	0.00301689	0.282537	-7.75072	0.85791	2.41541	501
107	07MKT12-65	27.1832	4.80201	0.282518	2.44948e-05	0.00157404	0.282504	-9.43115	0.866198	1.19175	500
108	07MKT12-68	104.25	3.21128	0.282576	5.14677e-05	0.00567912	0.282522	-7.40256	1.82003	1.87824	501
109	07MKT12-67	55.7689	3.92645	0.282501	2.50552e-05	0.00304731	0.282473	-10.0272	0.886018	0.0855169	499
110	07MKT12-59	47.8117	4.80251	0.282501	2.97111e-05	0.00277661	0.282475	-10.0314	1.05066	0.191587	500
111	07MKT12-56	25.3002	4.85833	0.282531	2.23152e-05	0.00149212	0.282517	-8.99035	0.789121	1.70309	502
112	07MKT12-11	36.8596	4.73764	0.282492	2.94737e-05	0.00214955	0.282472	-10.354	1.04226	0.0767744	500
113	07MKT12-80	27.3989	4.9605	0.282511	2.85042e-05	0.00152828	0.282497	-9.68641	1.00798	0.951393	500
114	07MKT12-71	22.3019	3.53113	0.282355	2.7869e-05	0.00125205	0.282343	-15.2065	0.98552	-4.48309	500
115	07MKT12-36	31.4576	4.9769	0.282548	2.27356e-05	0.0018609	0.28253	-8.39675	0.803988	2.13206	500
116	07MKT12-90	17.9147	5.03398	0.282517	2.49824e-05	0.00104782	0.282507	-9.46639	0.883441	1.35291	501
117	07MKT12-48	41.5449	4.76514	0.282523	2.68502e-05	0.00238957	0.282501	-9.25151	0.949491	1.10082	500
118	07MKT12-81	38.2124	4.72572	0.282497	2.36084e-05	0.00220515	0.282477	-10.1748	0.834853	0.258669	501
119	07MKT12-84	21.6633	3.66542	0.282436	2.45148e-05	0.00118277	0.282425	-12.3431	0.866906	-1.59355	500
120	07MKT12-009	36.7042	4.80984	0.282556	2.93248e-05	0.00210669	0.282536	-8.11	1.037	2.35854	501
Table 08-MKT-12. Hf isotopic data.
Order	Sample	(176Yb + 176Lu) / 176Hf (%)	Volts Hf	176Hf/177Hf	± (1s)	176Lu/177Hf	176Hf/177Hf (T)	E-Hf (0)	E-Hf (0) ± (1s)	E-Hf (T)	Age (Ma)
126	08MKT12-63	15.8732	5.49867	0.2824	2.50235e-05	0.000897547	0.282392	-13.6044	0.884895	-2.8488	496
127	08MKT12-096	28.4528	3.8636	0.282521	2.89906e-05	0.00145338	0.282507	-9.3404	1.02518	1.15108	492
128	08MKT12-093	11.7808	5.16327	0.282473	3.10612e-05	0.000689555	0.282466	-11.0388	1.0984	-0.0800845	502
129	08MKT12-028	17.1482	5.61904	0.28228	2.18032e-05	0.00105237	0.28227	-17.8479	0.771016	-7.148	496
130	08MKT12-026	20.3191	5.27237	0.282394	2.68989e-05	0.00114581	0.282384	-13.8216	0.951214	-3.29943	489
131	08MKT12-027	9.62495	5.26697	0.282477	2.74655e-05	0.000586802	0.282471	-10.9011	0.97125	0.180108	506
132	08MKT12-066	17.9138	5.27384	0.282407	2.66325e-05	0.000988206	0.282398	-13.3751	0.941793	-2.60559	498
133	08MKT12-067	18.0402	4.8956	0.282502	3.00095e-05	0.00121113	0.282491	-10.015	1.06121	0.554887	492
134	08MKT12-025	17.8017	5.38048	0.282342	2.61445e-05	0.00100727	0.282333	-15.6514	0.924538	-5.08628	489
135	08MKT12-022	23.5951	4.09087	0.282491	2.81746e-05	0.00126896	0.282479	-10.397	0.996325	0.304515	499
136	08MKT12-021	21.5381	5.02355	0.282371	2.67286e-05	0.00129649	0.282359	-14.6396	0.945192	-4.05961	494
137	08MKT12-013	19.594	5.90867	0.282342	2.58456e-05	0.00114124	0.282332	-15.6588	0.913965	-5.00735	495
138	08MKT12-083	15.4784	5.60895	0.282498	2.33623e-05	0.000897335	0.282489	-10.1588	0.826149	0.491631	491
139	08MKT12-073	15.8842	6.17762	0.282389	2.40345e-05	0.00094413	0.28238	-14.0049	0.849923	-3.33038	493
140	08MKT12-008	20.532	5.38086	0.282362	2.91489e-05	0.00121148	0.282351	-14.9565	1.03078	-4.34894	494
171	08MKT12-043	16.9364	5.16255	0.282415	2.89418e-05	0.000975495	0.282406	-13.068	1.02346	-2.35924	495
172	08MKT12-086	27.0377	5.94063	0.282394	2.92103e-05	0.00160582	0.282379	-13.8403	1.03295	-3.23292	500
173	08MKT12-041	27.4838	7.19132	0.282365	2.33789e-05	0.00176269	0.282348	-14.8566	0.826738	-4.28111	501
174	08MKT12-057	76.3762	7.98826	0.282557	2.76223e-05	0.00278967	0.282532	-8.04822	0.976795	2.06981	495
175	08MKT12-034	61.4757	3.90316	0.282514	2.88268e-05	0.00319674	0.282484	-9.57132	1.01939	0.573508	503
Table 08-MKT-12. Hf isotopic data.
Order	Sample	(176Yb + 176Lu) / 176Hf (%)	Volts Hf	176Hf/177Hf	± (1s)	176Lu/177Hf	176Hf/177Hf (T)	E-Hf (0)	E-Hf (0) ± (1s)	E-Hf (T)	Age (Ma)
126	08MKT12-63	15.8732	5.49867	0.2824	2.50235e-05	0.000897547	0.282392	-13.6044	0.884895	-2.8488	496
127	08MKT12-096	28.4528	3.8636	0.282521	2.89906e-05	0.00145338	0.282507	-9.3404	1.02518	1.15108	492
128	08MKT12-093	11.7808	5.16327	0.282473	3.10612e-05	0.000689555	0.282466	-11.0388	1.0984	-0.0800845	502
129	08MKT12-028	17.1482	5.61904	0.28228	2.18032e-05	0.00105237	0.28227	-17.8479	0.771016	-7.148	496
130	08MKT12-026	20.3191	5.27237	0.282394	2.68989e-05	0.00114581	0.282384	-13.8216	0.951214	-3.29943	489
131	08MKT12-027	9.62495	5.26697	0.282477	2.74655e-05	0.000586802	0.282471	-10.9011	0.97125	0.180108	506
132	08MKT12-066	17.9138	5.27384	0.282407	2.66325e-05	0.000988206	0.282398	-13.3751	0.941793	-2.60559	498
133	08MKT12-067	18.0402	4.8956	0.282502	3.00095e-05	0.00121113	0.282491	-10.015	1.06121	0.554887	492
134	08MKT12-025	17.8017	5.38048	0.282342	2.61445e-05	0.00100727	0.282333	-15.6514	0.924538	-5.08628	489
135	08MKT12-022	23.5951	4.09087	0.282491	2.81746e-05	0.00126896	0.282479	-10.397	0.996325	0.304515	499
136	08MKT12-021	21.5381	5.02355	0.282371	2.67286e-05	0.00129649	0.282359	-14.6396	0.945192	-4.05961	494
137	08MKT12-013	19.594	5.90867	0.282342	2.58456e-05	0.00114124	0.282332	-15.6588	0.913965	-5.00735	495
138	08MKT12-083	15.4784	5.60895	0.282498	2.33623e-05	0.000897335	0.282489	-10.1588	0.826149	0.491631	491
139	08MKT12-073	15.8842	6.17762	0.282389	2.40345e-05	0.00094413	0.28238	-14.0049	0.849923	-3.33038	493
140	08MKT12-008	20.532	5.38086	0.282362	2.91489e-05	0.00121148	0.282351	-14.9565	1.03078	-4.34894	494
171	08MKT12-043	16.9364	5.16255	0.282415	2.89418e-05	0.000975495	0.282406	-13.068	1.02346	-2.35924	495
172	08MKT12-086	27.0377	5.94063	0.282394	2.92103e-05	0.00160582	0.282379	-13.8403	1.03295	-3.23292	500
173	08MKT12-041	27.4838	7.19132	0.282365	2.33789e-05	0.00176269	0.282348	-14.8566	0.826738	-4.28111	501
174	08MKT12-057	76.3762	7.98826	0.282557	2.76223e-05	0.00278967	0.282532	-8.04822	0.976795	2.06981	495
175	08MKT12-034	61.4757	3.90316	0.282514	2.88268e-05	0.00319674	0.282484	-9.57132	1.01939	0.573508	503
Table 09-MKT-12. Hf isotopic data.
Order	Sample	(176Yb + 176Lu) / 176Hf (%)	Volts Hf	176Hf/177Hf	± (1s)	176Lu/177Hf	176Hf/177Hf (T)	E-Hf (0)	E-Hf (0) ± (1s)	E-Hf (T)	Age (Ma)
151	09MKT12-066	9.61923	5.24824	0.282386	3.10321e-05	0.00059465	0.282381	-14.1031	1.09738	-3.38029	490
152	09MKT12-068	11.6108	1.71352	0.282441	6.89818e-05	0.000740078	0.282434	-12.1621	2.43937	-1.41878	493
153	09MKT12-019	24.974	2.49248	0.282282	4.16802e-05	0.00164897	0.282267	-17.786	1.47392	-7.4316	489
154	09MKT12-002	11.599	3.52795	0.282383	2.98221e-05	0.000698042	0.282376	-14.2242	1.05459	-3.42552	495
155	09MKT12-051	12.4153	1.53061	0.282294	4.28939e-05	0.000805431	0.282286	-17.3779	1.51684	-6.39933	505
156	09MKT12-047	29.6311	2.01362	0.282341	4.99387e-05	0.00152224	0.282327	-15.7011	1.76596	-5.36744	486
157	09MKT12-014	8.264	3.27553	0.282344	2.63586e-05	0.000504016	0.282339	-15.593	0.932109	-4.71	496
158	09MKT12-023	17.2602	2.3374	0.282349	3.83749e-05	0.00095062	0.28234	-15.4224	1.35704	-4.66452	497
159	09MKT12-025	18.9535	3.55344	0.281897	3.23847e-05	0.00117894	0.281886	-31.4157	1.14521	-20.7941	495
160	09MKT12-054	12.5157	4.98197	0.282335	2.8686e-05	0.000726583	0.282328	-15.9116	1.01441	-5.34335	485
161	09MKT12-010	23.8389	4.1681	0.282551	3.10477e-05	0.00140107	0.282538	-8.26943	1.09793	2.30476	495
162	09MKT12-058	15.0952	2.47714	0.282317	3.45016e-05	0.000899108	0.282308	-16.5618	1.22007	-5.80998	496
163	09MKT12-060	20.1232	5.02993	0.282351	3.049e-05	0.0011183	0.28234	-15.3627	1.07821	-4.59506	500
164	09MKT12-071	10.2801	2.98151	0.282415	3.37785e-05	0.000620481	0.282409	-13.0785	1.19449	-2.31904	492
165	09MKT12-080	12.8355	5.4639	0.282378	2.73149e-05	0.000749483	0.282371	-14.4084	0.965925	-3.58301	497
166	09MKT12-097	8.64041	3.32815	0.28239	2.75436e-05	0.000535179	0.282385	-13.9661	0.974014	-3.31205	486
167	09MKT12-062	14.5775	2.84736	0.282404	4.16111e-05	0.000835214	0.282396	-13.4868	1.47147	-2.71056	496
168	09MKT12-040	15.6904	4.1962	0.282358	3.84572e-05	0.000930709	0.282349	-15.0989	1.35994	-4.22511	502
169	09MKT12-042	8.70306	5.34892	0.282367	2.65698e-05	0.000510249	0.282362	-14.7858	0.939576	-3.92595	495
170	09MKT12-032	8.6297	4.76251	0.282327	3.17371e-05	0.000506683	0.282322	-16.2119	1.1223	-5.1098	506
Table 05-MKT-12 . Hf isotopic data.
Order	Sample	(176Yb + 176Lu) / 176Hf (%)	Volts Hf	176Hf/177Hf	± (1s)	176Lu/177Hf	176Hf/177Hf (T)	E-Hf (0)	E-Hf (0) ± (1s)	E-Hf (T)	Age (Ma)
76	05MKT12-004	13.5643	5.65791	0.282436	2.07348e-05	0.000793734	0.282429	-12.3273	0.733235	-1.68488	489.2
77	05MKT12-005	16.5678	2.89967	0.282489	3.21306e-05	0.00102602	0.28248	-10.4619	1.13622	0.204865	493.7
78	05MKT12-003	10.4988	3.56225	0.282418	3.31595e-05	0.000643018	0.282412	-12.9926	1.17261	-2.14809	496.2
79	05MKT12-012	11.6566	2.89022	0.282466	2.73582e-05	0.000726344	0.282459	-11.2693	0.967457	-0.213458	507
80	05MKT12-016	16.7076	3.42364	0.282301	2.99969e-05	0.000995808	0.282292	-17.1016	1.06077	-6.30833	499.4
81	05MKT12-018	10.7192	3.39125	0.282362	3.28841e-05	0.000647466	0.282356	-14.9705	1.16287	-4.3384	486.7
82	05MKT12-020	15.0195	5.68648	0.282495	3.34459e-05	0.000989257	0.282485	-10.2705	1.18273	0.608737	502.9
83	05MKT12-021	11.9497	6.31295	0.282345	2.29746e-05	0.00071529	0.282338	-15.5569	0.81244	-4.87281	490.1
84	05MKT12-024	14.0772	4.33702	0.282499	3.07615e-05	0.000846578	0.282492	-10.0971	1.08781	0.744773	499
85	05MKT12-034	12.5136	6.21252	0.282421	2.92006e-05	0.0007362	0.282414	-12.8699	1.03261	-1.84546	505.8
86	05MKT12-039	19.4698	5.29277	0.282391	3.04502e-05	0.001131	0.28238	-13.9497	1.0768	-3.32329	493.6
87	05MKT12-025	11.2592	5.64506	0.282431	3.3203e-05	0.000667981	0.282425	-12.5017	1.17414	-1.63629	497.5
88	05MKT12-028	11.2383	5.47935	0.282449	2.16975e-05	0.000723695	0.282442	-11.8734	0.767278	-0.984087	499.4
Table 06-MKT-12. Hf isotopic data.
Order	Sample	(176Yb + 176Lu) / 176Hf (%)	Volts Hf	176Hf/177Hf	± (1s)	176Lu/177Hf	176Hf/177Hf (T)	E-Hf (0)	E-Hf (0) ± (1s)	E-Hf (T)	Age (Ma)
89	06MKT12-002	10.7823	5.49569	0.282493	3.04925e-05	0.000633248	0.282487	-10.3292	1.07829	0.50829	495.6
90	06MKT12-006	13.1484	5.67002	0.282444	2.21225e-05	0.000730126	0.282437	-12.0507	0.782309	-1.18996	498.2
91	06MKT12-012	10.7223	5.88268	0.282423	2.94668e-05	0.000642658	0.282417	-12.7893	1.04202	-1.76199	504.5
92	06MKT12-018	29.6128	4.94592	0.28256	3.83879e-05	0.0015359	0.282546	-7.95673	1.35749	2.68904	500.4
93	06MKT12-026	8.12016	5.87458	0.282379	2.53079e-05	0.000581252	0.282373	-14.3664	0.89495	-3.54486	494.3
94	06MKT12-027	23.0745	4.90918	0.282442	2.51675e-05	0.00132073	0.282429	-12.1427	0.889989	-1.34394	504.4
95	06MKT12-022	17.2054	5.25098	0.282457	2.9913e-05	0.00138115	0.282444	-11.5859	1.0578	-0.815381	504
96	06MKT12-033	12.3703	5.85478	0.282449	3.07525e-05	0.000739745	0.282442	-11.8993	1.08749	-0.997797	500.2
97	06MKT12-031	10.4353	4.68539	0.282487	3.02446e-05	0.000625766	0.282481	-10.5461	1.06953	0.251823	493.7
98	06MKT12-029	20.447	5.05672	0.282438	2.70377e-05	0.00117944	0.282427	-12.2773	0.956121	-1.44006	504
99	06MKT12-034	11.838	4.72775	0.282497	2.15789e-05	0.000710116	0.28249	-10.201	0.763083	0.591589	494.7
100	06MKT12-025	10.777	5.79278	0.282432	3.04471e-05	0.000643594	0.282426	-12.4805	1.07669	-1.60485	497.6
Table 01-LKB-12 . Hf isotopic data.
Order	Sample	(176Yb + 176Lu) / 176Hf (%)	Volts Hf	176Hf/177Hf	± (1s)	176Lu/177Hf	176Hf/177Hf (T)	E-Hf (0)	E-Hf (0) ± (1s)	E-Hf (T)	Age (Ma)
1	1LKB12-006	12.4507	4.09181	0.282381	3.02814e-05	0.000736101	0.282374	-14.3024	1.07083	-3.5733	492.4
2	1LKB12-015	5.69883	4.32677	0.282375	2.68811e-05	0.000346861	0.282372	-14.498	0.950585	-3.7815	486.1
3	1LKB12-017	4.87371	4.36409	0.282371	2.4702e-05	0.000304327	0.282369	-14.6246	0.873526	-3.99881	481.4
4	1LKB12-018	4.90053	4.19254	0.282388	2.51348e-05	0.000301914	0.282385	-14.0426	0.888829	-3.10239	495.5
5	1LKB12-019	6.0418	4.07014	0.28237	2.87906e-05	0.000370975	0.282367	-14.6728	1.01811	-3.91774	488.2
6	1LKB12-021	5.09083	4.38972	0.282347	2.31494e-05	0.000316126	0.282344	-15.4917	0.81862	-4.81301	484
7	1LKB12-033	7.94557	3.91388	0.282406	3.17594e-05	0.000483063	0.282402	-13.3963	1.12309	-2.59228	492
121	01LKB12-001	5.39272	4.63599	0.282358	2.27537e-05	0.000342321	0.282355	-15.11	0.804628	-4.38382	486.5
122	01LKB12-003	5.14539	4.06602	0.282352	2.58119e-05	0.000316315	0.282349	-15.3013	0.912774	-4.38718	494.6
123	01LKB12-004	5.60864	4.40507	0.282409	3.04917e-05	0.00034705	0.282405	-13.3128	1.07826	-2.32456	498.3
124	01LKB12-007	7.57496	3.69693	0.282378	3.07995e-05	0.000491228	0.282373	-14.3929	1.08915	-3.67874	488.1
125	01LKB12-008	5.53236	4.40291	0.282347	2.59252e-05	0.000348493	0.282344	-15.4949	0.916781	-4.82438	484.1
Table 02-LKB-12 . Hf isotopic data.
Order	Sample	(176Yb + 176Lu) / 176Hf (%)	Volts Hf	176Hf/177Hf	± (1s)	176Lu/177Hf	176Hf/177Hf (T)	E-Hf (0)	E-Hf (0) ± (1s)	E-Hf (T)	Age (Ma)
8	02LKB12-001	7.19907	4.57074	0.282376	2.6187e-05	0.000436259	0.282372	-14.4709	0.926038	-3.79207	485.7
9	02LKB12-002	12.0103	4.40722	0.282405	2.88495e-05	0.000733996	0.282399	-13.4251	1.02019	-2.81488	486.9
10	02LKB12-003	11.7069	5.35671	0.28237	2.48401e-05	0.000699915	0.282364	-14.6728	0.87841	-4.11436	484.1
11	02LKB12-009	4.7831	5.00536	0.282386	2.60706e-05	0.000299359	0.282384	-14.0994	0.921925	-3.3316	487.7
12	02LKB12-005	3.39986	4.6592	0.282376	2.39149e-05	0.000213702	0.282374	-14.4554	0.845691	-3.73595	484.3
13	02LKB12-006	6.14501	4.82177	0.282412	2.57641e-05	0.00037868	0.282408	-13.1966	0.911083	-2.2253	498
14	02LKB12-008	4.99498	5.39655	0.282376	2.59617e-05	0.000313764	0.282373	-14.4683	0.91807	-3.7433	486
15	02LKB12-011	6.47739	5.56165	0.282364	3.32468e-05	0.000402777	0.28236	-14.8895	1.17569	-3.97902	495.7
16	02LKB12-013	18.7003	5.33903	0.282391	2.2474e-05	0.00110066	0.282381	-13.9198	0.794737	-3.32677	491.6
17	02LKB12-017	7.28249	5.29449	0.282413	2.33136e-05	0.000460365	0.282409	-13.1601	0.824427	-2.36826	491.1
18	02LKB12-021	11.343	5.09263	0.282358	2.55796e-05	0.000683735	0.282352	-15.1003	0.904561	-4.29129	495.3
19	02LKB12-025	5.5677	5.04457	0.282329	3.03358e-05	0.0003436	0.282326	-16.1317	1.07275	-5.43584	485.2
20	02LKB12-029	13.8863	5.29419	0.282402	3.03035e-05	0.000824337	0.282394	-13.5382	1.07161	-2.73436	497.1

## Sheet: Table DR4
Link, P.K., Todt, M.K., Pearson, D.M., and Thomas, R.C., 2017, 500–490 Ma detrital zircons in Upper Cambrian Worm Creek and correlative sandstones, Idaho, Montana, and Wyoming: Magmatism and tectonism within the passive margin: Lithosphere, doi:10.1130/L671.1
GSA Data Repository Item 2017339
Table DR4. Results of Kolmogorov-Smirnov tests on detrital zircon samples
K-S P-values for Cambrian grains using error in the CDF
	Cycle 2	Cycle 3	Cycle 4	Cycle 1
Cycle 2		1	0.951	0.753
Cycle 3	1		0.994	0.88
Cycle 4	0.951	0.994		1
Cycle 1	0.753	0.883	1
